# Supplementary material for: Ligand architectural effect on coordination, bonding, interaction, and selectivity of Am(iii) and Ln(iii) ions with bitopic ligands: synthesis, solvent extraction, and DFT studies
Source: Royal Society of Chemistry journal article supplement (doi:10.1039/d0cp01615b), 2020-01-01
Supplement: d0cp01615b1.pdf [file d0cp01615b1.pdf]

## Electronic Supplementary Information

### Ligand Architectural Effect on Coordination, Bonding, Interaction and Selectivity of Am(III) and Ln(III) Ions with Bitopic Ligands: Synthesis, Solvent Extraction and DFT Studies

P. Sinharoy<sup>a,d</sup>, A.K. Singha Deb<sup>b,d</sup>, Sk. M. Ali<sup>b,d\*</sup>, J.N. Sharma<sup>a\*</sup>, C.P. Kaushik<sup>c</sup>

<sup>a</sup>Process Development Division, <sup>b</sup>Homi Bhabha National Institute, Mumbai

<sup>c</sup>Chemical Engineering Division, <sup>d</sup>Waste Management Division

Bhabha Atomic Research Centre, India, Mumbai 400085

#### Calculations of Gibbs free energy

The gas phase interaction energy ( $\Delta E$ ) between the  $M^{3+}$  ion and ligand (L) was calculated from energy of the optimized geometrics of individual reactant and products as in equation 1.

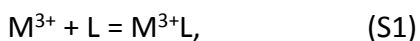

$$\Delta E = E_{M^{3+}L} - (E_{M^{3+}} + E_L) \quad (S2)$$

where,  $E_{M^{3+}L}$ ,  $E_{M^{3+}}$  and  $E_L$  refer to the energy of optimized geometric structures of  $M^{3+}L$ ,  $M^{3+}$ , and L respectively. The thermal correction to the electronic energy ( $E_{el}$ ), enthalpy (H) and free energy (G) of the optimized structures has been performed to predict the thermodynamic parameters. The zero point energy (ZPE) corrected binding energy is,

$$\Delta U = U_{Hg^{2+}-L} - (U_{Hg^{2+}} + U_L) \quad (S3)$$

Where U represents the internal energy of the molecular system i.e.  $U = E + ZPE$ . The binding enthalpy ( $\Delta H$ ) and binding free energy ( $\Delta G$ ) for the metal ion-L complexation reaction in equation (1) are calculated using the following standard thermodynamic relation

$$\Delta H = \Delta U + \Delta nRT. \quad (S4)$$

$$\Delta G = \Delta H - T\Delta S. \quad (S5)$$

Where  $\Delta n$  is the change in the number of moles in reaction in equation (1), R is the universal gas constant (8.314 J/(mol.K), and T is temperature in Kelvin. Entropy, S of individual molecular structure is calculated from the partition functions which is evaluated using the Turbomole software package.

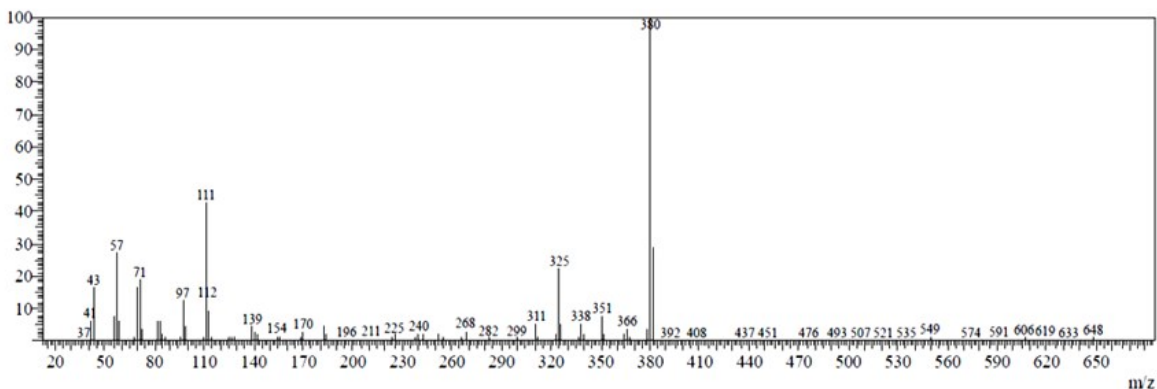

**Fig. S1.** MS spectrum of PIPDA (2-ethylhexyl)

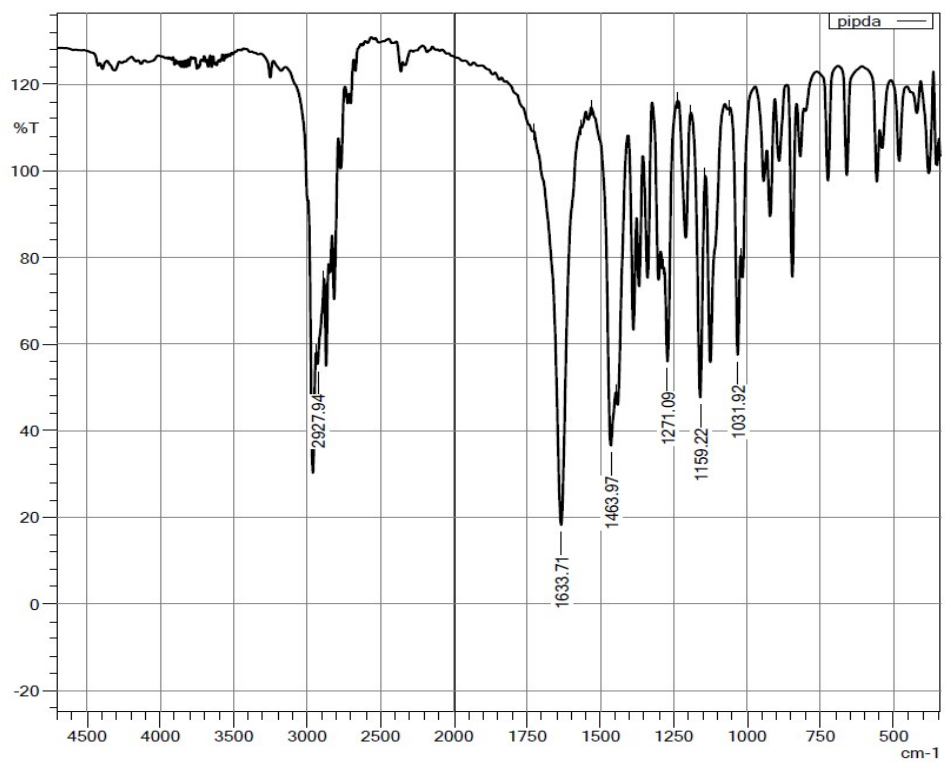

**Fig. S2.** FTIR spectrum of PIPDA (2-ethylhexyl)

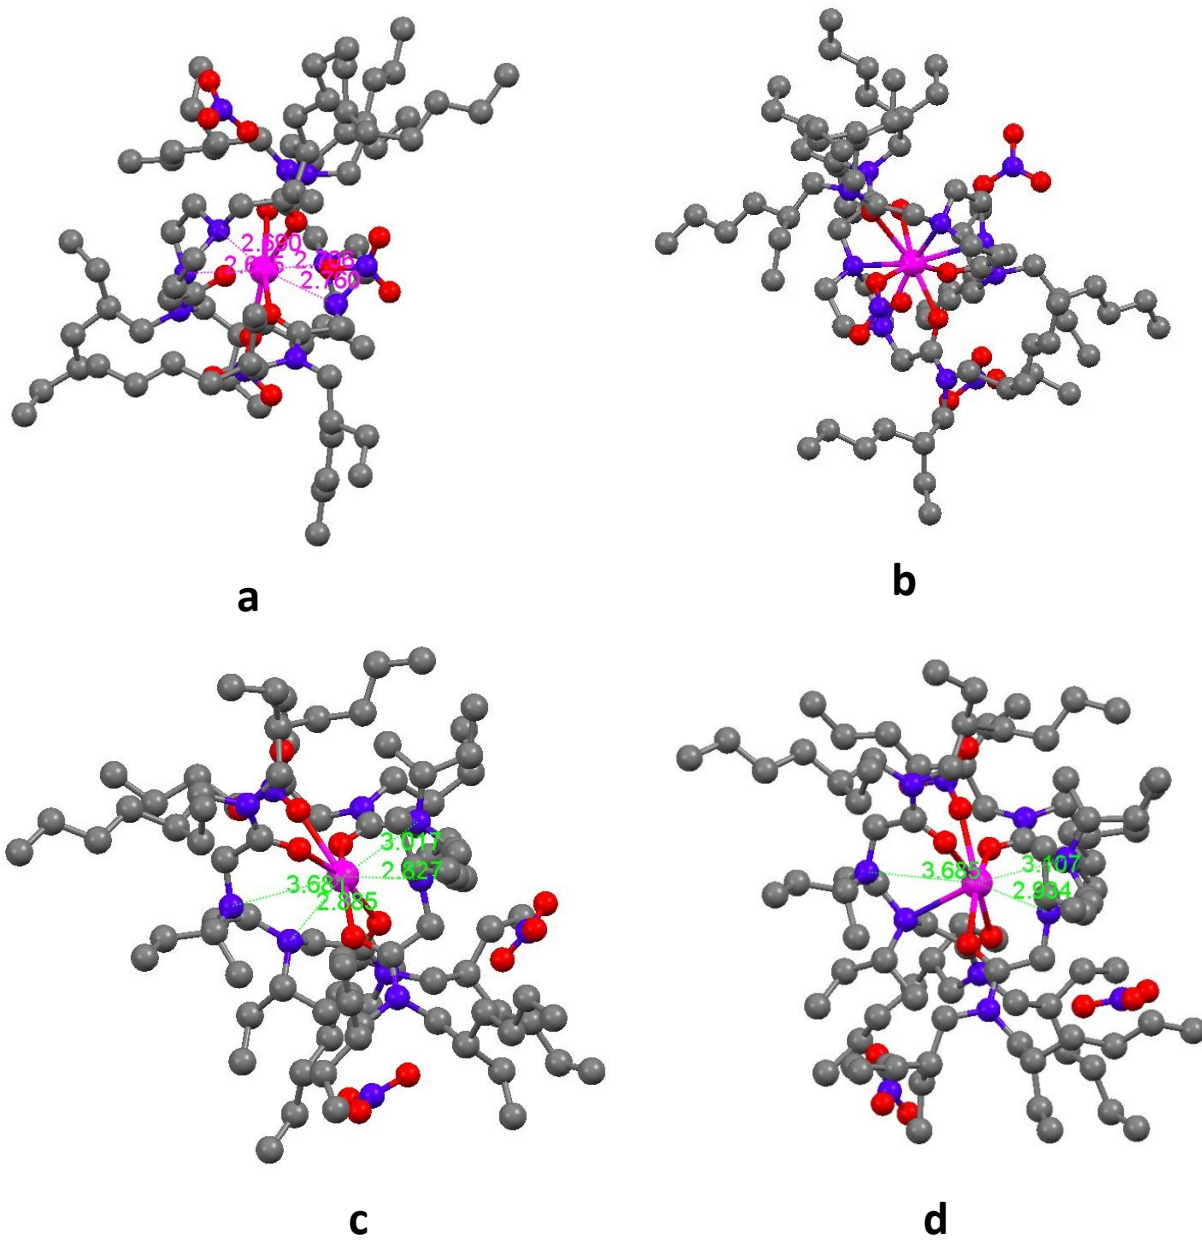

**Figure S3.** Optimized complexes PIPDA with (a) Am(III) and (b) Eu(III) and DADA with (c) Am(III) and (d) Eu(III) ions (H atoms were removed for better view of coordination).

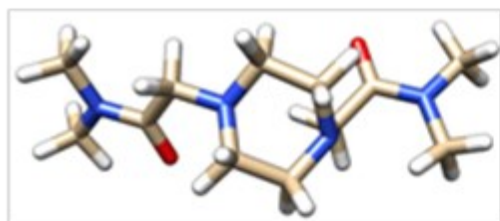

**a**

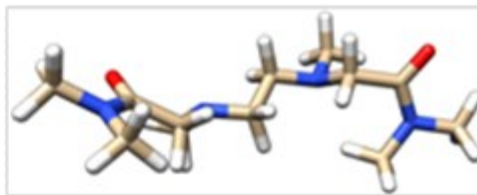

**b**

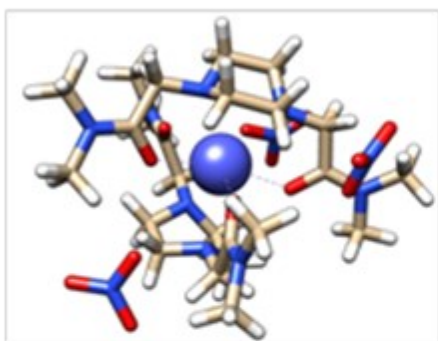

**c**

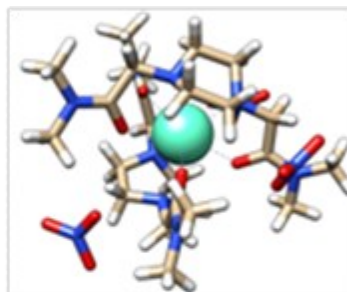

**d**

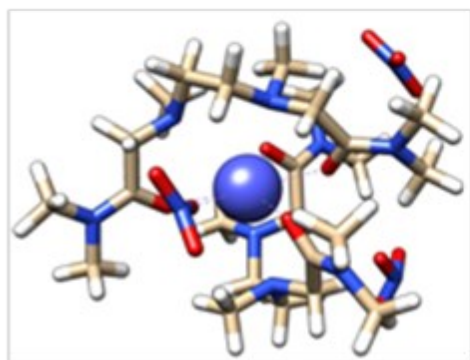

**e**

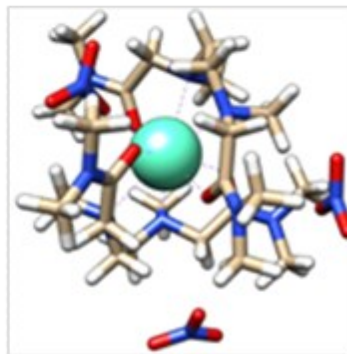

**f**

**Figure S4.** Optimized geometries of (a) methyl-PIPDA and (b) methyl-DADA and their complexes with (c) Am(III) and (d) Eu(III) and (e) Am(III) and (f) Eu(III) ions respectively.

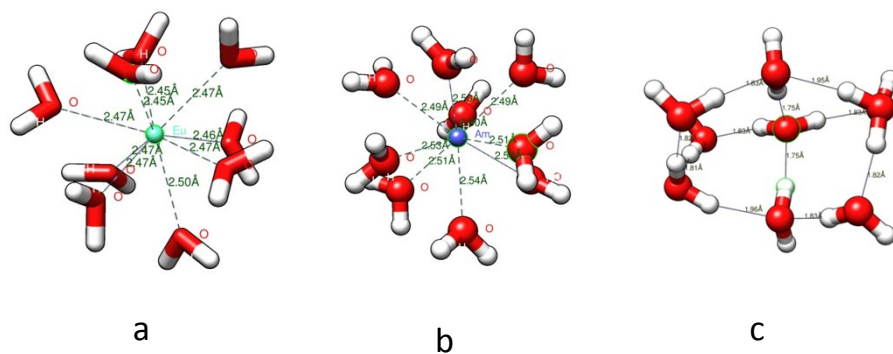

**Figure S5.** Optimized hydrated cluster of (a)  $\text{Eu}^{3+}(\text{H}_2\text{O})_9$  and (b)  $\text{Am}^{3+}(\text{H}_2\text{O})_9$  (c) 9-water cluster using COSMO approach.

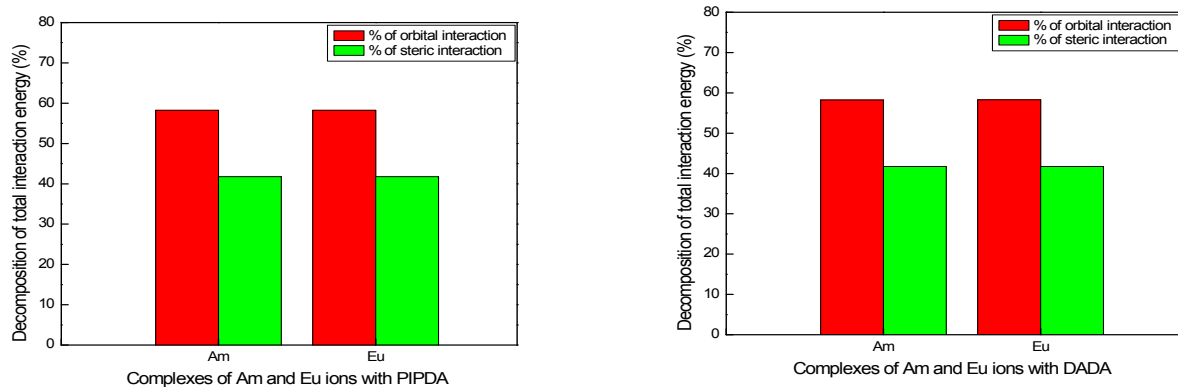

**Fig. S6.** Decomposition of total interaction energy in terms of orbital and steric contribution.

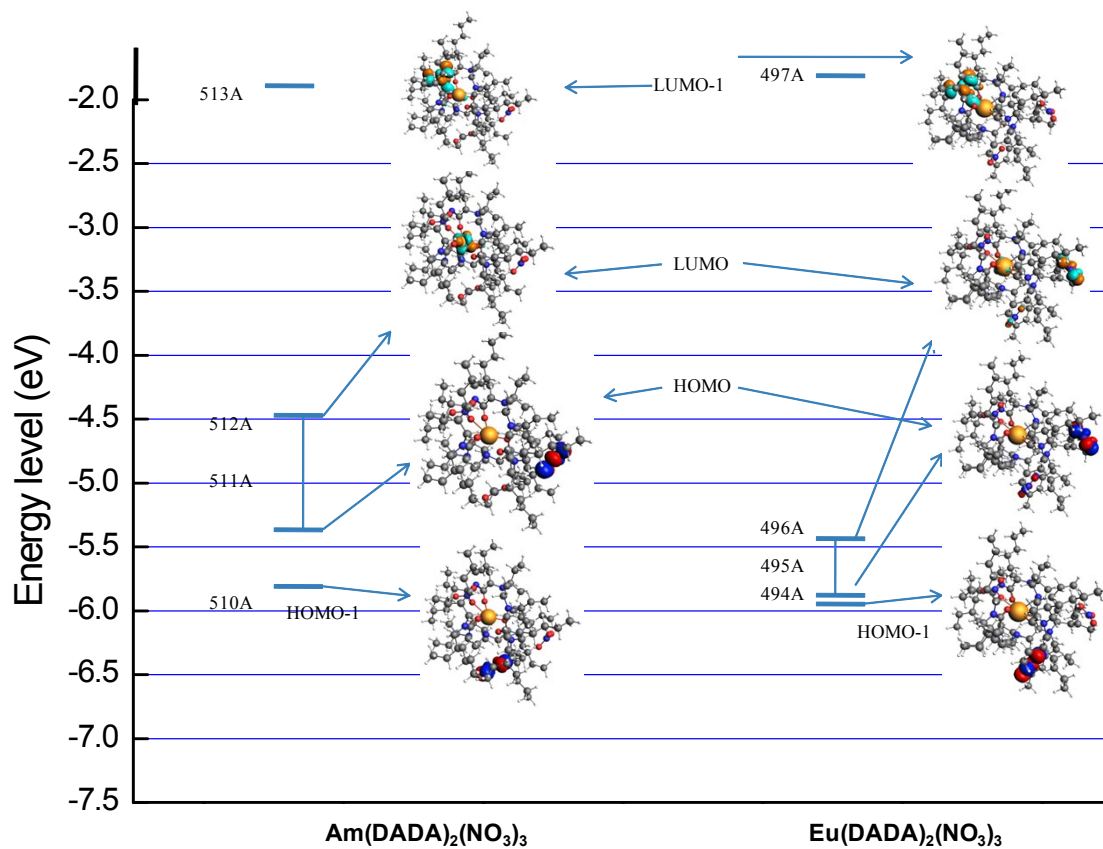

**Fig. S7.** The calculated energy levels (eV) of the  $\alpha$ -spin valence MOs of the  $[\text{M}(\text{DADA})_2(\text{NO}_3)_3]$  complexes using B3LYP/TZP/ZORA level of theory.

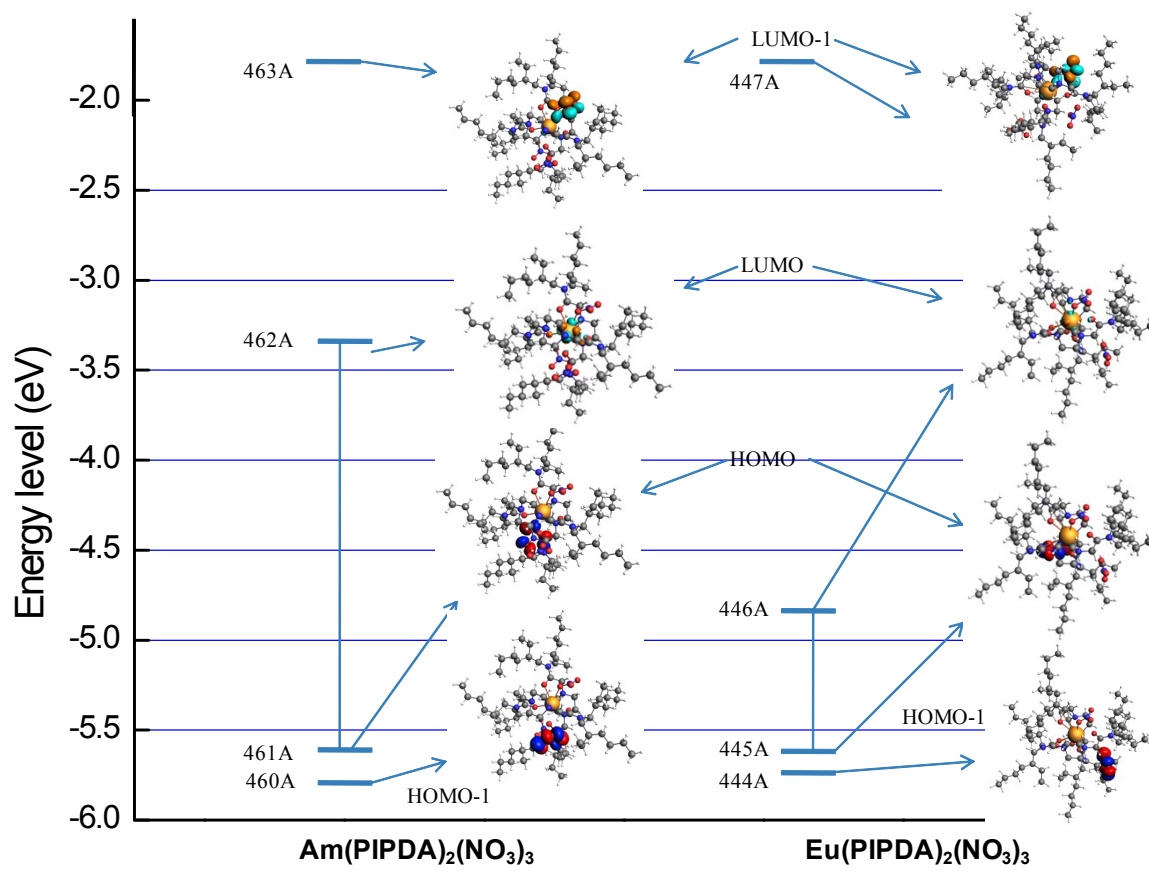

**Fig. S8.** The calculated energy levels (eV) of the  $\alpha$ -spin valence MOs of the  $[\text{M}(\text{PIPDA})_2(\text{NO}_3)_3]$  complexes using B3LYP/TZP/ZORA level of theory.



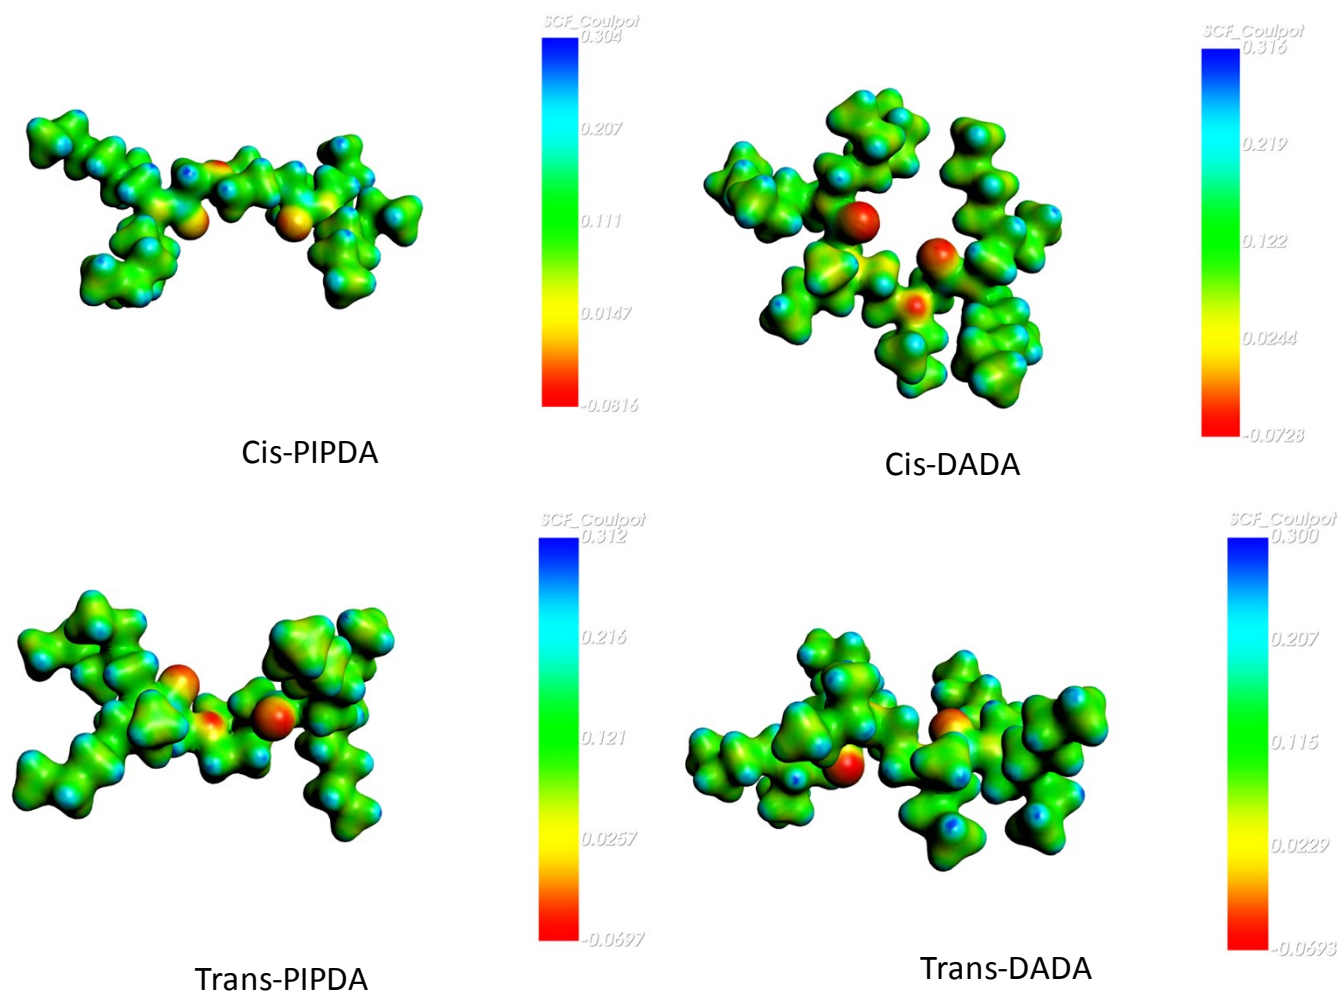

**Fig S9** Molecular electrostatic potential of (a) cis-PIPDA (b) trans-PIPDA, (c) cis-DADA and (d)trans-DADA at the B3LYP/TZP level of theory. Colour bar displays the electron density distribution. Red is the high electron density site.

**Table S1.** Calculated structural parameters ( Å) of complexes of  $\text{Eu}^{3+}$  and  $\text{Am}^{3+}$  ions at the B3LYP/TZVP level of theory.

| System                                                                     | M-O <sub>C=O</sub>           | M-N <sub>pip</sub>           | M-O <sub>NO<sub>3</sub></sub> |
|----------------------------------------------------------------------------|------------------------------|------------------------------|-------------------------------|
| [Am-(PIPDA) <sub>2</sub> -NO <sub>3</sub> ](NO <sub>3</sub> ) <sub>2</sub> | 2.388, 2.493<br>2.376, 2.683 | 2.685, 2.690<br>2.706, 2.760 | 2.463                         |
| [Eu-(PIPDA) <sub>2</sub> -NO <sub>3</sub> ](NO <sub>3</sub> ) <sub>2</sub> | 2.360, 2.465<br>2.347, 2.659 | 2.680, 2.747<br>2.655, 2.675 | 2.430                         |
| [Am-(DADA) <sub>2</sub> -NO <sub>3</sub> ](NO <sub>3</sub> ) <sub>2</sub>  | 2.467, 2.601<br>2.373, 2.556 | 2.827, 3.017<br>2.855        | 2.446                         |
| [Eu-(DADA) <sub>2</sub> -NO <sub>3</sub> ](NO <sub>3</sub> ) <sub>2</sub>  | 2.521, 2.735<br>2.499, 2.709 | 2.934, 3.107<br>2.903        | 2.412                         |

| System                                                                        | M-O <sub>C=O</sub>            | M-N <sub>pip</sub>             | M-O <sub>NO<sub>3</sub></sub> |
|-------------------------------------------------------------------------------|-------------------------------|--------------------------------|-------------------------------|
| [Am-(Me-PIPDA) <sub>2</sub> -NO <sub>3</sub> ](NO <sub>3</sub> ) <sub>2</sub> | 2.381, 2.631<br>2.468, 2.390  | 2.7134, 2.706,<br>2.718, 2.712 | 2.465                         |
| [Eu-(Me-PIPDA) <sub>2</sub> -NO <sub>3</sub> ](NO <sub>3</sub> ) <sub>2</sub> | 2.457, 2.362,<br>2.608, 2.351 | 2.679, 2.683,<br>2.687, 2.684  | 2.405                         |
| [Am-(Me-DADA) <sub>2</sub> -NO <sub>3</sub> ](NO <sub>3</sub> ) <sub>2</sub>  | 2.411, 2.388,<br>2.527, 2.563 | 2.757, 2.839,<br>2.930, 2.744  | 2.429                         |
| [Eu-(Me-DADA) <sub>2</sub> -NO <sub>3</sub> ](NO <sub>3</sub> ) <sub>2</sub>  | 2.444, 2.591,<br>2.410, 2.529 | 2.747, 2.799,<br>2.714, 2.899  | 2.453                         |

**Table S2.** Calculated structural parameters ( Å) of hydrated cluster of  $\text{Eu}^{3+}$  and  $\text{Am}^{3+}$  ions at the B3LYP/TZVP level of theory using COSMO phase.

| System                                  | M-O   |                    | deviation |
|-----------------------------------------|-------|--------------------|-----------|
|                                         | COSMO | Experiments        |           |
| $\text{Eu}^{3+}\text{-(H}_2\text{O)}_9$ | 2.467 | 2.457 <sup>1</sup> | 0.40%     |
| $\text{Am}^{3+}\text{-(H}_2\text{O)}_9$ | 2.515 | 2.503 <sup>2</sup> | 0.47%     |

<sup>1</sup> R. Gerkin, W. Reppart, *Acta. Crystallogr. Sect. C: Cryst. Struct. Commun.* 1984, **40**, 781.

<sup>2</sup> P. Lindqvist-Reis, C. Apostolidis, J. Rebizant, A. Morgenstern, R. Klenze, O. Walter, T. Fanghänel, R. Haire, *Angew. Chem. Int. Ed.*, 2007, **46**, 919.

**Table S3** Calculated values of binding energy using optimized geometry in solution phase.

| Chemical reaction                                                      | BE( kcal/mol) |
|------------------------------------------------------------------------|---------------|
| $Am^{3+} + 2L_I + 3NO_3^- \rightarrow [Am(L_I)_2(NO_3)](NO_3)_2$       | -93.4         |
| $Eu^{3+} + 2L_I + 3NO_3^- \rightarrow [Eu(L_I)_2(NO_3)](NO_3)_2$       | -79.9         |
| $Am^{3+} + 2L_{II} + 3NO_3^- \rightarrow [Am(L_{II})_2(NO_3)](NO_3)_2$ | -50.8         |
| $Eu^{3+} + 2L_{II} + 3NO_3^- \rightarrow [Eu(L_{II})_2(NO_3)](NO_3)_2$ | -35.75        |

The metal ion solvation energy was determined by placing bare gas phase metal ion in cluster of water molecules ( 9 water units) as:

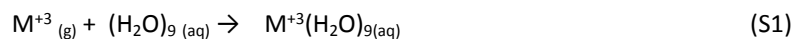**Table S4** Calculated free energy of hydration ( kcal/mol) for the Ln/An ions at the B3LYP/TZVP level of theory using COSMO solvation model.

| Metal ion        | COSMO   | Exp                   | Deviation | CCSD                  | Deviation |
|------------------|---------|-----------------------|-----------|-----------------------|-----------|
| Eu <sup>3</sup>  | -801.08 | -803.82 <sup>51</sup> | 0.34%     | -804.78 <sup>52</sup> | 0.45%     |
| Am <sup>3+</sup> | -782.35 | -                     | -         | -786.60 <sup>53</sup> | 0.54%     |

**Table S5** Quantum chemical descriptors of L<sub>I</sub> and L<sub>II</sub> using the value of HOMO and LUMO at the B3LYP/TZVP level of theory.

| S.No          | Complex         | E <sub>HOMO</sub><br>(eV) | E <sub>LUMO</sub><br>(eV) | ΔE<br>(eV) | χ<br>(eV) | η<br>(eV) | ΔN<br>Am/Eu |
|---------------|-----------------|---------------------------|---------------------------|------------|-----------|-----------|-------------|
| Gas Phase     |                 |                           |                           |            |           |           |             |
| 1             | L <sub>I</sub>  | -5.26                     | 0.55                      | 5.82       | 2.34      | 2.91      | 1.51/1.78   |
| 2             | L <sub>II</sub> | -4.78                     | 0.34                      | 5.13       | 2.22      | 2.56      | 1.60/1.89   |
| Solvent Phase |                 |                           |                           |            |           |           |             |
| 1             | L <sub>I</sub>  | -5.36                     | 0.24                      | 5.61       | 2.56      | 2.80      | 0.39/0.59   |
| 2             | L <sub>II</sub> | -4.89                     | 0.31                      | 5.21       | 2.28      | 2.60      | 0.44/0.66   |

**Table S6** Partial atomic charge on nitrogen and oxygen atoms of free conformers of PIPDA and DADA and their complexes with Am and Eu ions.

| Molecular system                                                          | N                              | O                              | Dipole moment (Debye) |
|---------------------------------------------------------------------------|--------------------------------|--------------------------------|-----------------------|
| Cis -PIPDA                                                                | -0.42, -0.42, -0.43, -0.41     | -0.61, -0.61                   | 3.69                  |
| Trans-PIPDA                                                               | -0.42, -0.42, -0.42, -0.41     | -0.61, -0.63                   | 2.60                  |
| Cis-DADA                                                                  | -0.43, -0.43, -0.44, -0.42     | -0.61, -0.62                   | 3.46                  |
| Trans-DADA                                                                | -0.44, -0.44, -0.42, -0.42     | -0.63, -0.62                   | 2.28                  |
| [Am(PIPDA) <sub>2</sub> -NO <sub>3</sub> ](NO <sub>3</sub> ) <sub>2</sub> | -0.437, -0.444, -0.443, -0.445 | -0.657, -0.728, -0.648, -0.719 |                       |
| [Eu(PIPDA) <sub>2</sub> -NO <sub>3</sub> ](NO <sub>3</sub> ) <sub>2</sub> | -0.427, -0.430, -0.426, -0.435 | -0.656, -0.720, -0.645, -0.709 |                       |
| [Am(DADA) <sub>2</sub> -NO <sub>3</sub> ](NO <sub>3</sub> ) <sub>2</sub>  | -0.471, -0.455, -0.432, -0.475 | -0.743, -0.688, -0.690, -0.755 |                       |
| [Eu(DADA) <sub>2</sub> -NO <sub>3</sub> ](NO <sub>3</sub> ) <sub>2</sub>  | -0.462, -0.449, -0.435, -0.462 | -0.719, -0.685, -0.679, -0.731 |                       |

**Table S7** Contribution (%) of metal, oxygen atoms and nitrogen atoms to the delocalized canonical MOs for complexes [Am(PIPDA)<sub>2</sub>-(NO<sub>3</sub>)<sub>3</sub>] and [Eu(PIPDA)<sub>2</sub>-(NO<sub>3</sub>)<sub>3</sub>].

|       |          |          |        |        |          |          |          |          |
|-------|----------|----------|--------|--------|----------|----------|----------|----------|
| Atoms | 463A     | 462 A    | 461 A  | 460 A  | 459 A    | 458 A    | 457 A    | 456 A    |
| Am    | -        | 100(f)   | -      | -      | 48.96(f) | 53.58(f) | 18.91(f) | 7.46     |
| O     | 50.70(p) | -        | 100(p) | 100(p) | 13.59(p) | 17.71(p) | 68.75(p) | 76.56(p) |
| N     | 49.3(p)  | -        | -      | -      | 37.45(p) | 28.71(p) | -        | 1.29(d)  |
|       |          |          |        |        |          |          |          |          |
|       | 447 A    | 446 A    | 445 A  | 444 A  | 443 A    | 442 A    | 441 A    | 440 A    |
| Eu    | 3.86(d)  | 90.58(f) | -      | -      | -        | -        | -        | -        |
| O     | 57.37(p) | 9.42(p)  | 100(p) | 100(p) | 87.58(p) | 92.76(p) | 79.8(p)  | 92.74(p) |
| N     | 36.67(p) | -        | -      | -      | 12.42(p) | 1.34(p)  | 3.15(p)  | 1.46(p)  |

**Table S8** Contribution (%) of metal, oxygen, and nitrogen atoms to the delocalized canonical MOs for complexes [Am(DADA)<sub>2</sub>-(NO<sub>3</sub>)<sub>3</sub>] and [Eu(DADA)<sub>2</sub>-(NO<sub>3</sub>)<sub>3</sub>].

|       |          |          |          |          |          |          |                    |                    |
|-------|----------|----------|----------|----------|----------|----------|--------------------|--------------------|
| Atoms | 513A     | 512 A    | 511 A    | 510 A    | 509 A    | 508 A    | 507 A              | 506 A              |
| Am    |          | 98.83(f) |          | -        | -        | -        | -                  | -                  |
| O     | 50.48(p) | 1.17(p)  | 100(p)   | 100(p)   | 100(p)   | 98.52(p) | 77.74(p)           | 80.84(p)           |
| N     | 36.62(p) | -        | -        | -        |          | 1.47(d)  | 5.66(p)<br>1.08(d) | 4.46(p)<br>1.37(d) |
|       |          |          |          |          |          |          |                    |                    |
|       | 497 A    | 496 A    | 495 A    | 494 A    | 493 A    | 492 A    |                    |                    |
| Eu    |          | 56.69(f) | 27.12(f) | 10.75(f) | -        | -        |                    |                    |
| O     | 35.51(p) | 36.49(p) | 72.88(p) | 89.25(p) | -        | 45.1(p)  |                    |                    |
| N     | 64.49(p) | -        | -        | -        | 61.33(p) | 26.91(p) |                    |                    |

**Table S9.** Calculated electron density ( $\rho_c$ ), Laplacian ( $\nabla^2 \rho_c$ ), total energy density (H) and Mayer bond orders of complexes of Am(III)/Eu(III) with DADA at the B3LYP/TZP/ZORA level of theory.

| System | Bonds              | $\rho_c$ (e/au <sup>3</sup> ) | $\nabla^2 \rho_c$ (e/au <sup>5</sup> ) | H               | Mayer bond order |
|--------|--------------------|-------------------------------|----------------------------------------|-----------------|------------------|
| PIPDA  | M-O <sub>C=O</sub> | 0.047/0.032                   | 0.19/0.13                              | -0.0023 /0.0011 | 0.25/0.15        |
|        | M-O <sub>NO3</sub> | 0.048/0.044                   | 0.21/0.20                              | -0.0002 /0.001  | 0.26/0.21        |
|        | M-N                | 0.027/0.020                   | 0.07/0.05                              | -0.0007 /0.005  | 0.14/0.09        |

**Table S10.** Calculated values total electronic energy, E, zero point energy (ZPE), entropy (S) and RT in gas phase.

| Species                                                                               | E (Hartree)  | ZPE(kJ/mol) | S(kJ/mol.K) | RT(kcal/mol) |
|---------------------------------------------------------------------------------------|--------------|-------------|-------------|--------------|
| Am <sup>3+</sup>                                                                      | -593.8398269 | 0           | 0.1713      | 0.593        |
| Eu <sup>3+</sup>                                                                      | -708.7741891 | 0           | 0.1777      |              |
| NO <sub>3</sub> <sup>-</sup>                                                          | -280.3477601 | 38.08       | 0.26063     |              |
| H <sub>2</sub> O                                                                      | -76.42314431 | 55.23       | 0.1949      |              |
| [Am(H <sub>2</sub> O) <sub>9</sub> ] <sup>3+</sup>                                    | -1282.503924 | 577.4       | 0.72206     |              |
| [Eu(H <sub>2</sub> O) <sub>9</sub> ] <sup>3+</sup>                                    | -1397.458676 | 580.8       | 0.69683     |              |
| L1                                                                                    | -1941.24725  | 3021        | 1.40129     |              |
| LII                                                                                   | -2178.208831 | 3509        | 1.5824      |              |
| [Am(L <sub>1</sub> ) <sub>2</sub> (NO <sub>3</sub> )](NO <sub>3</sub> ) <sub>2</sub>  | -5319.016943 | 6190        | 2.90891     |              |
| [Eu(L <sub>1</sub> ) <sub>2</sub> (NO <sub>3</sub> )](NO <sub>3</sub> ) <sub>2</sub>  | -5433.972966 | 6184.76     | 2.8933      |              |
| [Am(L <sub>II</sub> ) <sub>2</sub> (NO <sub>3</sub> )](NO <sub>3</sub> ) <sub>2</sub> | -5792.860582 | 7172        | 3.27203     |              |
| [Eu(L <sub>II</sub> ) <sub>2</sub> (NO <sub>3</sub> )](NO <sub>3</sub> ) <sub>2</sub> | -5907.823673 | 7168        | 3.25453     |              |

Coordinates:

[Eu-(H<sub>2</sub>O)<sub>9</sub>]<sup>3+</sup>

|    |            |            |            |
|----|------------|------------|------------|
| O  | -1.4238689 | 1.9565707  | 0.4543462  |
| Eu | 0.0084031  | -0.0135609 | 0.0191154  |
| O  | 1.3959326  | 1.9490752  | -0.5440374 |
| O  | -0.7444411 | 1.0416165  | -2.1171583 |
| O  | 2.3993523  | -0.5350602 | 0.3367843  |
| O  | -1.5929777 | -0.5451866 | 1.8251677  |
| O  | 0.7673254  | 0.8993288  | 2.1641626  |
| O  | -1.9425757 | -1.2047325 | -0.8954465 |
| O  | 0.2896807  | -2.3384166 | 0.7473606  |
| O  | 0.8746059  | -1.2579393 | -1.9327736 |
| H  | -1.2022970 | 2.8843477  | 0.2993877  |
| H  | -2.2309501 | 1.9479132  | 0.9861434  |
| H  | -0.5072924 | 0.7704047  | -3.0135742 |
| H  | 3.1438933  | 0.0424649  | 0.1224264  |
| H  | 2.7645505  | -1.3483722 | 0.7095718  |
| H  | -1.3655306 | 1.7772796  | -2.1999454 |
| H  | -2.4686708 | -0.9433198 | 1.7345807  |
| H  | -1.4573936 | -0.3628929 | 2.7643342  |
| H  | 0.3882085  | 1.6560376  | 2.6305065  |
| H  | -2.2108206 | -2.1172797 | -0.7247955 |
| H  | 1.6268236  | 0.7190238  | 2.5681561  |
| H  | -2.4884979 | -0.8847748 | -1.6261161 |
| H  | 0.6356705  | -3.0717215 | 0.2213122  |
| H  | -0.1376417 | -2.7225302 | 1.5244599  |
| H  | 1.8103646  | -1.4444388 | -2.0853735 |
| H  | 0.3785172  | -1.7511872 | -2.5994713 |
| H  | 1.3650674  | 2.3852471  | -1.4060289 |
| H  | 1.9245626  | 2.5121034  | 0.0369052  |

[Am-(H<sub>2</sub>O)<sub>9</sub>]<sup>3+</sup>

|    |            |            |            |
|----|------------|------------|------------|
| O  | -1.4591333 | 1.9898220  | 0.4679395  |
| Am | 0.0083235  | -0.0185675 | 0.0256063  |
| O  | 0.9077510  | -1.2696377 | -1.9738771 |
| O  | 1.4209344  | 1.9748513  | -0.5629398 |
| O  | -0.7616648 | 1.0538183  | -2.1467204 |
| O  | 2.4173620  | -0.5621541 | 0.3934891  |
| O  | -1.5681151 | -0.5787220 | 1.8824013  |
| O  | 0.7720257  | 0.9670302  | 2.1836073  |
| O  | -1.9847261 | -1.2174544 | -0.9064986 |
| O  | 0.2726610  | -2.4014285 | 0.7064729  |

|   |            |            |            |
|---|------------|------------|------------|
| H | -1.2445313 | 2.9163456  | 0.2961889  |
| H | -2.2756026 | 1.9877146  | 0.9854289  |
| H | -0.5207294 | 0.7876067  | -3.0436945 |
| H | 3.1753726  | 0.0032720  | 0.1940620  |
| H | 2.7643783  | -1.3877075 | 0.7568579  |
| H | -1.3807279 | 1.7911815  | -2.2300381 |
| H | -2.4435750 | -0.9827373 | 1.8183716  |
| H | -1.4223547 | -0.3594217 | 2.8121929  |
| H | 0.3851390  | 1.7298690  | 2.6333943  |
| H | -2.2601088 | -2.1272549 | -0.7324264 |
| H | 1.6227540  | 0.7897546  | 2.6070419  |
| H | -2.5292354 | -0.8963984 | -1.6378714 |
| H | 0.6190958  | -3.1264687 | 0.1695920  |
| H | -0.1340397 | -2.7954825 | 1.4896351  |
| H | 1.8442521  | -1.4552727 | -2.1236939 |
| H | 0.4179905  | -1.7531145 | -2.6524136 |
| H | 1.3972711  | 2.4081789  | -1.4266703 |
| H | 1.9592342  | 2.5323768  | 0.0145592  |

[(H<sub>2</sub>O)<sub>9</sub>]

|   |            |            |            |
|---|------------|------------|------------|
| O | -2.5441743 | 2.1432899  | -0.4957474 |
| O | 1.7221857  | 1.0568523  | 0.3825589  |
| O | -0.4693809 | 0.4719097  | -1.1257226 |
| O | 2.5243666  | -1.3975120 | -0.9218577 |
| O | -2.1646397 | 0.8760474  | 1.9527358  |
| O | 0.4188006  | 1.4803091  | 2.8265108  |
| O | -1.4266760 | -1.5088584 | 0.4841914  |
| O | 0.8862669  | -3.0869095 | 0.5867468  |
| O | 0.9649258  | -0.7225829 | -3.1256301 |
| H | -2.4140718 | 3.0981873  | -0.4455995 |
| H | -2.4689198 | 1.8092680  | 0.4287723  |
| H | -0.1438133 | 0.2131891  | -2.0159001 |
| H | 2.4522371  | -0.5725831 | -0.4053262 |
| H | 2.0017341  | -2.0538222 | -0.4095681 |
| H | -1.1772754 | 1.1499885  | -1.1900211 |
| H | -2.0238366 | -0.0295635 | 1.6173118  |
| H | -1.2908887 | 1.1388891  | 2.3183997  |
| H | 0.5585007  | 2.3902754  | 3.1167287  |
| H | -2.1775472 | -1.9846516 | 0.1057420  |
| H | 0.9690966  | 1.3720470  | 2.0202416  |
| H | -1.1312740 | -0.8652679 | -0.2055947 |
| H | 0.7097010  | -3.9447442 | 0.1807620  |
| H | 0.0232337  | -2.6183785 | 0.6012397  |
| H | 1.6032960  | -1.0064634 | -2.4299390 |
| H | 1.4804305  | -0.2193867 | -3.7678419 |
| H | 0.9239773  | 0.9831956  | -0.1962976 |

H 2.2015078 1.8403997 0.0828776

Cis-DADA

C -2.0415070 -0.9780954 3.5848906  
C -2.4045437 0.4340250 3.0844792  
N -0.6100691 -1.2535585 3.6788270  
H -2.4843588 -1.0906127 4.5858359  
H -2.5624752 -1.7238042 2.9432651  
N -3.8417084 0.6647399 3.1917688  
H -1.8437926 1.1725096 3.6821504  
H -2.0505299 0.5913693 2.0562970  
C -4.3091875 1.4166133 4.3613212  
H -3.6029183 1.1493305 5.1683265  
C -4.2490200 2.9471463 4.1944833  
C -5.6948213 0.9286310 4.8363401  
C -0.1640999 -2.0111186 4.8588521  
H 0.9205398 -2.1624853 4.7234203  
C -0.3226123 -1.1860312 6.1432873  
C -0.8007217 -3.4188394 4.9667504  
C -4.6282119 0.6512498 1.9892625  
C 0.0550138 -1.5943054 2.4281856  
H 0.5924253 -2.5517690 2.5138064  
H -0.6960765 -1.7463599 1.6332066  
C -4.4270268 1.8419837 1.0136477  
O -3.4624618 2.5841485 1.1294212  
N -5.3190284 1.9976505 -0.0292536  
C -5.0199580 3.0581174 -1.0007395  
C -6.5466402 1.2276022 -0.2122224  
C 0.9396574 -0.4569880 1.8658489  
O 0.3757462 0.5385363 1.4293461  
N 2.3149215 -0.5838391 1.8018908  
C 3.0555298 0.5132849 1.1503939  
C 3.0949238 -1.6320716 2.4673048  
H -5.9521012 3.2861858 -1.5391177  
H -4.7295273 3.9609575 -0.4418819  
H -6.5708380 0.8452846 -1.2467467  
H -6.5154523 0.3375065 0.4295101  
C -7.8736089 1.9896441 0.0462142  
H 2.3962297 -2.3323367 2.9359136  
H 3.6537153 -2.2126466 1.7134569  
H 3.9921168 0.6643575 1.7068256  
H 2.4504063 1.4216068 1.2739452  
H -6.4721656 1.2506981 4.1201739  
H -5.6833871 -0.1744858 4.8077149  
C -6.0949455 1.4000616 6.2371388  
H -3.2625593 3.2600798 3.8241277  
H -4.4436702 3.4636056 5.1488075



|   |             |            |            |
|---|-------------|------------|------------|
| H | -4.9944896  | 3.2994134  | 3.4632833  |
| H | -5.3512028  | 1.0953630  | 6.9933351  |
| H | -7.0642983  | 0.9681416  | 6.5350590  |
| H | -6.1948904  | 2.4957569  | 6.2948378  |
| H | -1.8814450  | -3.3140217 | 5.1668928  |
| C | -0.1723780  | -4.3341971 | 6.0213430  |
| H | -0.7231590  | -3.9065035 | 3.9783618  |
| H | 0.1398814   | -0.1959269 | 6.0136697  |
| H | 0.1591596   | -1.6840263 | 6.9990916  |
| H | -1.3817763  | -1.0344745 | 6.4074290  |
| H | -0.3220350  | -3.9536922 | 7.0445356  |
| H | 0.9151241   | -4.4413681 | 5.8653453  |
| H | -0.6114634  | -5.3443328 | 5.9830312  |
| C | -7.9491569  | 2.5757117  | 1.4749313  |
| H | -7.9069784  | 2.8351947  | -0.6664291 |
| C | -9.0352098  | 1.0373717  | -0.3099892 |
| C | -10.4469324 | 1.6353798  | -0.2836667 |
| H | -9.0043895  | 0.1707560  | 0.3788780  |
| H | -8.8402543  | 0.6238902  | -1.3155318 |
| C | -11.5573364 | 0.6611897  | -0.7106372 |
| H | -10.6752528 | 1.9910280  | 0.7348669  |
| H | -10.4793572 | 2.5302252  | -0.9332323 |
| H | -12.5329086 | 1.1337572  | -0.4997462 |
| C | -11.5225053 | 0.2387400  | -2.1821917 |
| H | -11.5166061 | -0.2378616 | -0.0680568 |
| H | -8.4286770  | 1.8406246  | 2.1479452  |
| H | -6.9240241  | 2.7078050  | 1.8559340  |
| C | -8.6558790  | 3.9308827  | 1.5924448  |
| H | -9.7045218  | 3.8925299  | 1.2609587  |
| H | -8.6509493  | 4.2892658  | 2.6349267  |
| H | -8.1451932  | 4.6939594  | 0.9809823  |
| H | -12.3780053 | -0.4107983 | -2.4289074 |
| H | -11.5689534 | 1.1161909  | -2.8500762 |
| H | -10.6072810 | -0.3209657 | -2.4354632 |
| C | -3.8930650  | 2.7259766  | -2.0057679 |
| C | -4.2664411  | 1.5294536  | -2.9070662 |
| H | -3.0258055  | 2.4204617  | -1.3969287 |
| C | -3.1439320  | 0.9734295  | -3.8100524 |
| H | -4.5849715  | 0.7152266  | -2.2364726 |
| H | -5.1579848  | 1.7738898  | -3.5136307 |
| H | -3.2695719  | -0.1214850 | -3.8928137 |
| H | -2.1750867  | 1.1164302  | -3.2992220 |
| C | -3.0473022  | 1.5321477  | -5.2409645 |
| C | -4.2244672  | 1.1627549  | -6.1484257 |
| H | -2.1171369  | 1.1469885  | -5.6959039 |
| H | -2.9327813  | 2.6290292  | -5.2183358 |
| H | -4.0782400  | 1.5497651  | -7.1701873 |
| H | -4.3446426  | 0.0680564  | -6.2218719 |

|   |            |            |            |
|---|------------|------------|------------|
| H | -5.1790349 | 1.5730259  | -5.7788972 |
| C | -3.4572437 | 4.0046364  | -2.7546263 |
| C | -4.5153579 | 4.6795905  | -3.6348363 |
| H | -2.5714518 | 3.7698334  | -3.3682159 |
| H | -3.1030655 | 4.7308668  | -2.0015628 |
| H | -4.0930804 | 5.5613755  | -4.1438690 |
| H | -4.8999590 | 4.0057256  | -4.4178740 |
| H | -5.3806842 | 5.0313735  | -3.0493377 |
| C | 3.4075882  | 0.3537868  | -0.3493786 |
| C | 2.1760185  | 0.4524933  | -1.2906073 |
| H | 4.0423330  | 1.2387558  | -0.5519279 |
| C | 2.3574709  | 1.4304484  | -2.4601219 |
| H | 1.9275015  | -0.5492664 | -1.6879902 |
| H | 1.2967940  | 0.7669856  | -0.7087135 |
| C | 1.1400904  | 1.5159791  | -3.3847968 |
| H | 2.5699202  | 2.4370242  | -2.0525616 |
| H | 3.2472493  | 1.1585404  | -3.0568089 |
| C | 1.3097171  | 2.5166170  | -4.5296816 |
| H | 0.9260989  | 0.5133467  | -3.7994858 |
| H | 0.2523076  | 1.7863123  | -2.7848232 |
| H | 2.1691758  | 2.2538200  | -5.1700651 |
| H | 1.4861023  | 3.5364848  | -4.1472048 |
| H | 0.4152542  | 2.5534661  | -5.1728531 |
| C | 4.2821544  | -0.8872616 | -0.6229119 |
| C | 4.9103998  | -0.9514322 | -2.0175643 |
| H | 3.6726503  | -1.7950405 | -0.4641606 |
| H | 5.0926132  | -0.9255043 | 0.1279652  |
| H | 5.5538466  | -1.8407240 | -2.1187025 |
| H | 4.1488862  | -1.0089539 | -2.8117414 |
| H | 5.5350233  | -0.0648715 | -2.2196667 |
| C | 4.1068994  | -1.1544429 | 3.5397493  |
| C | 3.4542493  | -0.2726062 | 4.6182990  |
| H | 4.8635628  | -0.5319857 | 3.0288344  |
| C | 4.4315512  | 0.3784352  | 5.6031810  |
| H | 2.8777191  | 0.5231030  | 4.1161338  |
| H | 2.7071418  | -0.8599993 | 5.1808242  |
| C | 3.7575436  | 1.3592945  | 6.5687998  |
| H | 4.9569386  | -0.3964070 | 6.1909955  |
| H | 5.2203033  | 0.9112695  | 5.0382702  |
| C | 4.7252847  | 2.0048378  | 7.5618183  |
| H | 3.2460140  | 2.1468224  | 5.9859160  |
| H | 2.9583988  | 0.8316406  | 7.1210932  |
| H | 5.5170745  | 2.5699345  | 7.0409695  |
| H | 5.2232911  | 1.2467215  | 8.1904010  |
| H | 4.2060120  | 2.7054734  | 8.2355560  |
| C | 4.8947213  | -2.3654696 | 4.0938385  |
| C | 4.1188163  | -3.3550876 | 4.9701925  |
| H | 5.7571755  | -1.9866689 | 4.6677889  |

|   |            |            |           |
|---|------------|------------|-----------|
| H | 5.3326240  | -2.9099785 | 3.2378269 |
| H | 4.7766836  | -4.1756805 | 5.2991892 |
| H | 3.7166990  | -2.8773877 | 5.8782175 |
| H | 3.2718106  | -3.8169626 | 4.4366177 |
| H | -5.6896289 | 0.5495545  | 2.2549902 |
| H | -4.3896982 | -0.2593421 | 1.4050052 |

#### Trans DADA

|   |            |            |            |
|---|------------|------------|------------|
| C | -2.1960487 | -0.7744329 | 3.5040084  |
| C | -2.4899051 | 0.7275802  | 3.3008139  |
| N | -0.7716675 | -1.0729273 | 3.6396778  |
| H | -2.7234641 | -1.1111277 | 4.4109928  |
| H | -2.6572625 | -1.3343075 | 2.6697077  |
| N | -3.8984861 | 1.0381256  | 3.1632044  |
| H | -2.0446472 | 1.2839843  | 4.1500792  |
| H | -1.9414672 | 1.0726458  | 2.4100312  |
| C | -4.6977657 | 1.2319616  | 4.3704815  |
| H | -4.1325860 | 0.7381045  | 5.1809052  |
| C | -4.8280074 | 2.7207719  | 4.7511030  |
| C | -6.0604938 | 0.5108520  | 4.2961929  |
| C | -0.3253504 | -1.8003509 | 4.8321285  |
| H | 0.7650204  | -1.9266794 | 4.7160742  |
| C | -0.5275152 | -0.9622388 | 6.1022521  |
| C | -0.9286776 | -3.2225339 | 4.9504518  |
| C | -4.4200808 | 1.3943857  | 1.8809385  |
| H | -5.2457970 | 2.1213026  | 1.9875492  |
| H | -3.6460318 | 1.9152920  | 1.2877354  |
| C | -0.0433504 | -1.3355105 | 2.4121313  |
| H | 0.4715821  | -2.3088465 | 2.4523244  |
| H | -0.7544086 | -1.4106449 | 1.5716827  |
| C | -4.9526955 | 0.1984514  | 1.0389915  |
| O | -4.9002981 | -0.9473331 | 1.4657307  |
| N | -5.5037739 | 0.4659917  | -0.1947537 |
| C | -6.0390194 | -0.6742808 | -0.9488362 |
| C | -5.5137515 | 1.7775869  | -0.8376877 |
| C | 0.8857894  | -0.1700905 | 1.9928072  |
| O | 0.3556860  | 0.8816088  | 1.6487492  |
| N | 2.2593108  | -0.3124868 | 1.9698819  |
| C | 3.0430606  | 0.8496876  | 1.5096260  |
| C | 2.9881829  | -1.4972493 | 2.4404561  |
| H | -6.1473932 | -0.3533390 | -1.9953082 |
| H | -5.2925882 | -1.4845956 | -0.9269942 |
| H | -6.5433265 | 1.9999556  | -1.1686905 |
| H | -5.2668467 | 2.5446637  | -0.0926500 |
| C | -4.5692476 | 1.9446039  | -2.0569346 |
| H | 2.2602184  | -2.2017925 | 2.8532714  |
| H | 3.4599015  | -2.0086795 | 1.5840006  |

|   |             |            |            |
|---|-------------|------------|------------|
| H | 3.9634676   | 0.8874666  | 2.1088935  |
| H | 2.4548505   | 1.7437330  | 1.7571314  |
| H | -6.7057571  | 1.0206297  | 3.5562218  |
| H | -5.8753631  | -0.4966118 | 3.8923246  |
| C | -6.8078231  | 0.4133176  | 5.6284412  |
| H | -3.8332554  | 3.1884805  | 4.8244188  |
| H | -5.3369330  | 2.8566089  | 5.7190531  |
| H | -5.4070386  | 3.2772873  | 3.9938138  |
| H | -6.1956069  | -0.0927217 | 6.3951519  |
| H | -7.7376086  | -0.1678299 | 5.5162719  |
| H | -7.0882115  | 1.4011383  | 6.0291702  |
| H | -2.0085644  | -3.1419095 | 5.1660410  |
| C | -0.2627874  | -4.1220222 | 5.9956728  |
| H | -0.8552469  | -3.7084600 | 3.9610944  |
| H | -0.0520377  | 0.0233786  | 5.9841277  |
| H | -0.0883533  | -1.4544511 | 6.9842319  |
| H | -1.5968585  | -0.7994401 | 6.3153328  |
| H | -0.3762370  | -3.7277784 | 7.0184952  |
| H | 0.8186753   | -4.2304474 | 5.8024017  |
| H | -0.7016954  | -5.1329238 | 5.9871343  |
| C | -3.0976099  | 1.6186614  | -1.7134957 |
| H | -4.9015382  | 1.2251574  | -2.8287675 |
| C | -4.7905046  | 3.3629516  | -2.6235031 |
| C | -4.0551854  | 3.7066142  | -3.9244486 |
| H | -4.5023487  | 4.1001989  | -1.8490839 |
| H | -5.8756364  | 3.5030274  | -2.7774074 |
| C | -4.3774526  | 5.1025529  | -4.4824819 |
| H | -2.9670564  | 3.6451496  | -3.7559944 |
| H | -4.2883204  | 2.9458331  | -4.6933394 |
| H | -3.6721541  | 5.3203083  | -5.3039205 |
| C | -5.8071790  | 5.2807842  | -5.0014879 |
| H | -4.1703627  | 5.8599140  | -3.7036950 |
| H | -2.5782074  | 2.5424887  | -1.3989071 |
| H | -3.0739367  | 0.9534693  | -0.8358004 |
| C | -2.3057026  | 0.9266368  | -2.8286314 |
| H | -2.2343063  | 1.5385877  | -3.7405365 |
| H | -1.2790286  | 0.7032650  | -2.4976639 |
| H | -2.7779545  | -0.0297971 | -3.1105407 |
| H | -5.9515535  | 6.2853943  | -5.4312968 |
| H | -6.0385305  | 4.5458312  | -5.7915880 |
| H | -6.5597902  | 5.1575181  | -4.2056494 |
| C | -7.3795903  | -1.2391199 | -0.4282721 |
| C | -8.5071679  | -0.1877409 | -0.4860348 |
| H | -7.2132794  | -1.4801927 | 0.6346828  |
| C | -9.8308930  | -0.5737522 | 0.2108909  |
| H | -8.1196916  | 0.7190421  | 0.0061296  |
| H | -8.6993218  | 0.1087767  | -1.5336268 |
| H | -10.2682320 | 0.3325999  | 0.6676059  |

|   |             |            |            |
|---|-------------|------------|------------|
| H | -9.6008630  | -1.2449629 | 1.0580402  |
| C | -10.9211712 | -1.2191255 | -0.6628479 |
| C | -11.5363215 | -0.2786726 | -1.7029337 |
| H | -11.7244943 | -1.5832893 | 0.0023655  |
| H | -10.5260799 | -2.1166587 | -1.1681064 |
| H | -12.3296791 | -0.7829925 | -2.2783441 |
| H | -11.9856568 | 0.6080197  | -1.2233285 |
| H | -10.7889588 | 0.0841591  | -2.4281218 |
| C | -7.6916649  | -2.5816951 | -1.1261836 |
| C | -7.9023635  | -2.5369579 | -2.6443130 |
| H | -8.5801615  | -3.0290535 | -0.6500818 |
| H | -6.8637503  | -3.2779836 | -0.9018901 |
| H | -8.1435173  | -3.5399594 | -3.0327816 |
| H | -8.7311411  | -1.8694599 | -2.9316719 |
| H | -7.0018722  | -2.1935476 | -3.1796867 |
| C | 3.4436521   | 0.9233318  | 0.0141554  |
| C | 2.2618845   | 1.2613683  | -0.9354408 |
| H | 4.1348661   | 1.7892603  | -0.0119607 |
| C | 2.5534448   | 2.4114415  | -1.9104894 |
| H | 1.9725110   | 0.3610770  | -1.5091345 |
| H | 1.3785894   | 1.5252367  | -0.3353967 |
| C | 1.3826899   | 2.7475941  | -2.8390363 |
| H | 2.8193012   | 3.3140576  | -1.3278551 |
| H | 3.4449163   | 2.1809869  | -2.5214310 |
| C | 1.6733567   | 3.9059612  | -3.7958080 |
| H | 1.1104332   | 1.8483227  | -3.4218817 |
| H | 0.4939367   | 2.9860328  | -2.2266931 |
| H | 2.5327046   | 3.6797000  | -4.4499037 |
| H | 1.9161830   | 4.8305735  | -3.2444631 |
| H | 0.8101730   | 4.1240860  | -4.4457615 |
| C | 4.2601999   | -0.3027752 | -0.4430230 |
| C | 4.9426189   | -0.1636495 | -1.8063385 |
| H | 3.5967926   | -1.1861668 | -0.4645835 |
| H | 5.0344803   | -0.5189417 | 0.3151356  |
| H | 5.5430901   | -1.0582694 | -2.0388586 |
| H | 4.2134460   | -0.0389428 | -2.6224062 |
| H | 5.6198087   | 0.7068348  | -1.8311351 |
| C | 4.0835680   | -1.2536177 | 3.5068803  |
| C | 3.5442747   | -0.5322458 | 4.7546770  |
| H | 4.8496559   | -0.5973200 | 3.0572052  |
| C | 4.6161557   | -0.0745007 | 5.7499439  |
| H | 2.9658002   | 0.3482022  | 4.4269940  |
| H | 2.8153271   | -1.1795699 | 5.2741916  |
| C | 4.0530930   | 0.7187454  | 6.9348810  |
| H | 5.1735141   | -0.9461503 | 6.1380367  |
| H | 5.3639429   | 0.5465102  | 5.2205029  |
| C | 5.1252550   | 1.1937404  | 7.9169605  |
| H | 3.4894659   | 1.5897525  | 6.5536218  |

|   |           |            |           |
|---|-----------|------------|-----------|
| H | 3.3124558 | 0.0954294  | 7.4689065 |
| H | 5.8548780 | 1.8585085  | 7.4235154 |
| H | 5.6884846 | 0.3439351  | 8.3388356 |
| H | 4.6852112 | 1.7513971  | 8.7595274 |
| C | 4.8206382 | -2.5808755 | 3.8085978 |
| C | 4.0329568 | -3.6544161 | 4.5681858 |
| H | 5.7384375 | -2.3490299 | 4.3750015 |
| H | 5.1717085 | -3.0035844 | 2.8498012 |
| H | 4.6471776 | -4.5592628 | 4.7021978 |
| H | 3.7322546 | -3.3147487 | 5.5724626 |
| H | 3.1180548 | -3.9639540 | 4.0362253 |

#### Cis-PIPDA

|   |             |            |            |
|---|-------------|------------|------------|
| C | -3.5180228  | 1.6808969  | 0.5903896  |
| H | -4.2097658  | 1.4225019  | 1.4141579  |
| H | -3.5304115  | 2.7825119  | 0.5173425  |
| C | -4.0878882  | 1.0714509  | -0.7170571 |
| O | -3.4274158  | 0.2726834  | -1.3682271 |
| N | -5.3652443  | 1.4148131  | -1.1028201 |
| C | -5.9017339  | 0.7375850  | -2.2911043 |
| C | -6.1736526  | 2.4544771  | -0.4728665 |
| C | 2.0805644   | -1.7035961 | 1.1877371  |
| O | 1.2200733   | -2.4528883 | 0.7519223  |
| N | 3.3742088   | -2.1343908 | 1.4070379  |
| C | 3.7077169   | -3.5195764 | 1.0334308  |
| C | 4.4708958   | -1.2627564 | 1.8361766  |
| H | -6.7611786  | 1.3250540  | -2.6467471 |
| H | -5.1317563  | 0.7641556  | -3.0785945 |
| H | -7.1708764  | 2.0385518  | -0.2475156 |
| H | -5.7320715  | 2.7140834  | 0.4985454  |
| C | -6.3696438  | 3.7535490  | -1.2978898 |
| H | 4.0500861   | -0.3742775 | 2.3232182  |
| H | 5.0372135   | -1.7887666 | 2.6197495  |
| H | 4.7230862   | -3.5129865 | 0.6046477  |
| H | 3.0153470   | -3.8072281 | 0.2296152  |
| C | -5.0258166  | 4.4136458  | -1.6843425 |
| H | -6.8876419  | 3.4696652  | -2.2335149 |
| C | -7.3218006  | 4.6719936  | -0.5027138 |
| C | -7.8141313  | 5.9349375  | -1.2192714 |
| H | -6.8208456  | 4.9689234  | 0.4392712  |
| H | -8.1973216  | 4.0718122  | -0.1967228 |
| C | -8.8054057  | 6.7819758  | -0.4044538 |
| H | -6.9513936  | 6.5710170  | -1.4777891 |
| H | -8.2829655  | 5.6514396  | -2.1806278 |
| H | -8.9790247  | 7.7282921  | -0.9467168 |
| C | -10.1569232 | 6.1177461  | -0.1264498 |
| H | -8.3329801  | 7.0702428  | 0.5531345  |

|   |             |            |            |
|---|-------------|------------|------------|
| H | -4.7392156  | 5.1427642  | -0.9040028 |
| H | -4.2381834  | 3.6425479  | -1.6798686 |
| C | -4.9954281  | 5.0838944  | -3.0630947 |
| H | -5.7294310  | 5.8987406  | -3.1561002 |
| H | -4.0002618  | 5.5093423  | -3.2717930 |
| H | -5.2134720  | 4.3526400  | -3.8594343 |
| H | -10.8357050 | 6.8066739  | 0.4020600  |
| H | -10.6547993 | 5.8166615  | -1.0643162 |
| H | -10.0592146 | 5.2159585  | 0.4995979  |
| C | -6.3181664  | -0.7341155 | -2.0673619 |
| C | -7.4750314  | -0.8503978 | -1.0527157 |
| H | -5.4409955  | -1.2316715 | -1.6219746 |
| C | -7.8263286  | -2.2775599 | -0.5777590 |
| H | -7.1776095  | -0.2673049 | -0.1655835 |
| H | -8.3769873  | -0.3453740 | -1.4447653 |
| H | -8.1440598  | -2.2279864 | 0.4796419  |
| H | -6.9042796  | -2.8862013 | -0.5766230 |
| C | -8.9252898  | -3.0276308 | -1.3516885 |
| C | -10.3270630 | -2.4309331 | -1.1992783 |
| H | -8.9453709  | -4.0718767 | -0.9920103 |
| H | -8.6675876  | -3.0895535 | -2.4224221 |
| H | -11.0781229 | -3.0318626 | -1.7376397 |
| H | -10.6309668 | -2.3908302 | -0.1390399 |
| H | -10.3872028 | -1.4039077 | -1.5963499 |
| C | -6.5557716  | -1.4308049 | -3.4252240 |
| C | -7.6980807  | -0.8840362 | -4.2890451 |
| H | -6.7195092  | -2.5067159 | -3.2462548 |
| H | -5.6142954  | -1.3746551 | -3.9998440 |
| H | -7.7948563  | -1.4677255 | -5.2189623 |
| H | -8.6713336  | -0.9303801 | -3.7735699 |
| H | -7.5314075  | 0.1649794  | -4.5843516 |
| C | 3.6527574   | -4.6071173 | 2.1355297  |
| C | 2.2205784   | -4.8691718 | 2.6782462  |
| H | 3.9732671   | -5.5213117 | 1.5971061  |
| C | 1.7817436   | -6.3388479 | 2.6176151  |
| H | 2.1463481   | -4.5113433 | 3.7221230  |
| H | 1.4982831   | -4.2721842 | 2.1028003  |
| C | 0.3849674   | -6.5849517 | 3.1961735  |
| H | 1.7994064   | -6.6728055 | 1.5627706  |
| H | 2.5115830   | -6.9805090 | 3.1453922  |
| C | -0.0818301  | -8.0370432 | 3.0782558  |
| H | 0.3740195   | -6.2791475 | 4.2589939  |
| H | -0.3382228  | -5.9219776 | 2.6872230  |
| H | 0.6049527   | -8.7250759 | 3.6008401  |
| H | -0.1280643  | -8.3582056 | 2.0236770  |
| H | -1.0855541  | -8.1776878 | 3.5117331  |
| C | 4.6865060   | -4.3807868 | 3.2577130  |
| C | 4.8851894   | -5.5712330 | 4.1999951  |

|   |            |            |            |
|---|------------|------------|------------|
| H | 4.3864037  | -3.4996751 | 3.8533546  |
| H | 5.6614628  | -4.1278725 | 2.8015669  |
| H | 5.6633304  | -5.3552353 | 4.9500617  |
| H | 3.9632135  | -5.8219675 | 4.7487454  |
| H | 5.1973419  | -6.4734749 | 3.6471253  |
| C | 5.4735744  | -0.8335293 | 0.7340334  |
| C | 4.8282921  | 0.0546134  | -0.3457535 |
| H | 5.8107494  | -1.7574033 | 0.2292383  |
| C | 5.7157775  | 0.3630121  | -1.5570917 |
| H | 3.9129556  | -0.4455079 | -0.7066261 |
| H | 4.4937171  | 1.0069372  | 0.1056435  |
| C | 5.0043818  | 1.1862379  | -2.6375972 |
| H | 6.6226954  | 0.9071575  | -1.2364761 |
| H | 6.0751101  | -0.5858273 | -1.9985691 |
| C | 5.8884485  | 1.5078841  | -3.8436101 |
| H | 4.1025014  | 0.6433976  | -2.9747614 |
| H | 4.6358015  | 2.1277522  | -2.1898520 |
| H | 6.2394037  | 0.5878143  | -4.3411518 |
| H | 6.7827557  | 2.0810605  | -3.5445041 |
| H | 5.3469498  | 2.1054439  | -4.5947624 |
| C | 6.7404872  | -0.2232285 | 1.3788997  |
| C | 6.5591570  | 1.1108267  | 2.1114366  |
| H | 7.5105398  | -0.0998775 | 0.5991607  |
| H | 7.1568972  | -0.9652762 | 2.0840402  |
| H | 7.5157551  | 1.4484999  | 2.5416893  |
| H | 6.2072466  | 1.9094007  | 1.4383680  |
| H | 5.8398099  | 1.0385813  | 2.9440453  |
| C | -2.0178647 | -0.1441603 | 1.3073738  |
| C | -0.6619445 | -0.3603586 | 1.9749565  |
| N | 0.4105621  | 0.1315529  | 1.1216318  |
| C | 0.2371224  | 1.5398239  | 0.8077177  |
| C | -1.1072858 | 1.7618508  | 0.1144270  |
| N | -2.1888793 | 1.2625033  | 0.9528097  |
| H | -2.0912883 | -0.8068416 | 0.4250493  |
| H | -0.6499170 | 0.1570248  | 2.9649315  |
| H | 0.2842207  | 2.1827663  | 1.7196677  |
| H | -1.2546710 | 2.8445192  | -0.0468037 |
| H | -1.0859470 | 1.2692299  | -0.8777648 |
| H | 1.0468725  | 1.8614617  | 0.1314801  |
| H | -2.8168187 | -0.4281117 | 2.0144425  |
| H | -0.5143184 | -1.4356897 | 2.1431089  |
| C | 1.7377601  | -0.2394292 | 1.5429184  |
| H | 2.4551251  | 0.4278466  | 1.0450511  |
| H | 1.9019622  | -0.0972823 | 2.6391862  |

Trans-PIPDA



|   |            |            |            |
|---|------------|------------|------------|
| C | -3.8322553 | 1.3904716  | 1.4656912  |
| H | -4.6814060 | 1.5376840  | 2.1778306  |
| H | -3.6909427 | 2.3584983  | 0.9675827  |
| C | 0.0995485  | -0.2783826 | 1.6026717  |
| H | 0.0828268  | -1.3759196 | 1.6901510  |
| H | -0.6500018 | -0.0016115 | 0.8431585  |
| C | -4.2661933 | 0.3316800  | 0.4311926  |
| O | -3.8106665 | -0.8038039 | 0.4610371  |
| N | -5.2074509 | 0.6919538  | -0.5061352 |
| C | -5.6175639 | -0.3455939 | -1.4614568 |
| C | -5.7459832 | 2.0376571  | -0.6870447 |
| C | 1.4485373  | 0.1977899  | 1.0395621  |
| O | 1.4499105  | 1.0863464  | 0.1915279  |
| N | 2.6157183  | -0.3930671 | 1.4717004  |
| C | 3.8741366  | 0.0554169  | 0.8539596  |
| C | 2.6790043  | -1.3223092 | 2.6040511  |
| H | -6.0696410 | 0.1651728  | -2.3247279 |
| H | -4.7112009 | -0.8594398 | -1.8172822 |
| H | -6.8401009 | 1.9562076  | -0.7978976 |
| H | -5.5897379 | 2.6181109  | 0.2324094  |
| C | -5.1990316 | 2.8388747  | -1.8993236 |
| H | 1.6549739  | -1.5114971 | 2.9381353  |
| H | 3.0917053  | -2.2875426 | 2.2656930  |
| H | 4.6458550  | 0.0865857  | 1.6385648  |
| H | 3.7086506  | 1.0869716  | 0.5144138  |
| C | -3.6604968 | 2.9840554  | -1.8703169 |
| H | -5.4643341 | 2.2706863  | -2.8110438 |
| C | -5.9671068 | 4.1779465  | -1.9439087 |
| C | -5.6901629 | 5.1009391  | -3.1366098 |
| H | -5.7539818 | 4.7350475  | -1.0109267 |
| H | -7.0474980 | 3.9499770  | -1.9115915 |
| C | -6.5411454 | 6.3819098  | -3.1544195 |
| H | -4.6276986 | 5.3947350  | -3.1319797 |
| H | -5.8491933 | 4.5453418  | -4.0798481 |
| H | -6.1453783 | 7.0501164  | -3.9394072 |
| C | -8.0378024 | 6.1680800  | -3.3990502 |
| H | -6.3971399 | 6.9240567  | -2.2013690 |
| H | -3.3889444 | 3.8916993  | -1.2987481 |
| H | -3.2334795 | 2.1368275  | -1.3106942 |
| C | -2.9710232 | 3.0045339  | -3.2401871 |
| H | -3.2944797 | 3.8467062  | -3.8700812 |
| H | -1.8778193 | 3.0769135  | -3.1235293 |
| H | -3.1800542 | 2.0762347  | -3.7984308 |
| H | -8.5722484 | 7.1304558  | -3.4515257 |
| H | -8.2147862 | 5.6379879  | -4.3507359 |
| H | -8.5133938 | 5.5773725  | -2.5989672 |
| C | -6.5901965 | -1.4094467 | -0.9045569 |
| C | -7.9276559 | -0.7862319 | -0.4518749 |

|   |             |            |            |
|---|-------------|------------|------------|
| H | -6.1025573  | -1.8241077 | -0.0065774 |
| C | -8.8928948  | -1.7240198 | 0.3066223  |
| H | -7.6764943  | 0.0509771  | 0.2196622  |
| H | -8.4442286  | -0.3255298 | -1.3136908 |
| H | -9.4216605  | -1.1362711 | 1.0785946  |
| H | -8.2970394  | -2.4681726 | 0.8650660  |
| C | -9.9611857  | -2.4544351 | -0.5269057 |
| C | -11.0325729 | -1.5385011 | -1.1249534 |
| H | -10.4557753 | -3.1979640 | 0.1234035  |
| H | -9.4857352  | -3.0375726 | -1.3334204 |
| H | -11.7864138 | -2.1167343 | -1.6836670 |
| H | -11.5622277 | -0.9759349 | -0.3368894 |
| H | -10.6059264 | -0.8001905 | -1.8245079 |
| C | -6.7131564  | -2.5824609 | -1.9024934 |
| C | -7.3067838  | -2.2554002 | -3.2777210 |
| H | -7.3059766  | -3.3853340 | -1.4329746 |
| H | -5.7052565  | -3.0125500 | -2.0421355 |
| H | -7.3690389  | -3.1631652 | -3.8996594 |
| H | -8.3251785  | -1.8402168 | -3.2054694 |
| H | -6.6928923  | -1.5277326 | -3.8332404 |
| C | 4.4198676   | -0.7716752 | -0.3373030 |
| C | 3.5147606   | -0.7033340 | -1.5974047 |
| H | 5.3709341   | -0.2598926 | -0.5867794 |
| C | 4.2606969   | -0.3961412 | -2.9038107 |
| H | 2.9613324   | -1.6546841 | -1.7089842 |
| H | 2.7472172   | 0.0709558  | -1.4514583 |
| C | 3.3478448   | -0.3577815 | -4.1334910 |
| H | 4.7706789   | 0.5811282  | -2.8033847 |
| H | 5.0646742   | -1.1347982 | -3.0736582 |
| C | 4.0813784   | -0.0154026 | -5.4317917 |
| H | 2.8440696   | -1.3363790 | -4.2415095 |
| H | 2.5391897   | 0.3753589  | -3.9600406 |
| H | 4.8757805   | -0.7496633 | -5.6501431 |
| H | 4.5595614   | 0.9774716  | -5.3728685 |
| H | 3.3959786   | -0.0020477 | -6.2951066 |
| C | 4.7878181   | -2.2139441 | 0.0679404  |
| C | 5.6045491   | -2.9983898 | -0.9621461 |
| H | 3.8592736   | -2.7725587 | 0.2838268  |
| H | 5.3549961   | -2.1831690 | 1.0162120  |
| H | 5.8695971   | -3.9961944 | -0.5757603 |
| H | 5.0489950   | -3.1494665 | -1.9011106 |
| H | 6.5451271   | -2.4790476 | -1.2130002 |
| C | 3.5050286   | -0.8527984 | 3.8265581  |
| C | 3.0486481   | 0.5213733  | 4.3469214  |
| H | 4.5570224   | -0.7483193 | 3.5033369  |
| C | 3.8720252   | 1.0859239  | 5.5095582  |
| H | 3.0904082   | 1.2377533  | 3.5079686  |
| H | 1.9822018   | 0.4714555  | 4.6242812  |

|   |            |            |           |
|---|------------|------------|-----------|
| C | 3.4753028  | 2.5158459  | 5.8940065 |
| H | 3.7716198  | 0.4390469  | 6.4000648 |
| H | 4.9473254  | 1.0669658  | 5.2466519 |
| C | 4.2697621  | 3.0782961  | 7.0739783 |
| H | 3.6008026  | 3.1754281  | 5.0157049 |
| H | 2.3955136  | 2.5386503  | 6.1312466 |
| H | 5.3514141  | 3.0987658  | 6.8564265 |
| H | 4.1296216  | 2.4656787  | 7.9809162 |
| H | 3.9610470  | 4.1079724  | 7.3177839 |
| C | 3.5191994  | -1.9666172 | 4.9009657 |
| C | 2.1946680  | -2.2465698 | 5.6196350 |
| H | 4.2848275  | -1.7149151 | 5.6536336 |
| H | 3.8752941  | -2.8991910 | 4.4263434 |
| H | 2.3229754  | -3.0475589 | 6.3656829 |
| H | 1.8191728  | -1.3588535 | 6.1529704 |
| H | 1.4012409  | -2.5722671 | 4.9279383 |
| C | -2.6949085 | 0.0205096  | 3.1468176 |
| C | -1.2699318 | -0.3686589 | 3.6507239 |
| N | -0.1919738 | 0.2848811  | 2.9231306 |
| C | -0.3671688 | 1.7333882  | 2.9542419 |
| C | -1.8118749 | 2.1920401  | 2.5729125 |
| N | -2.5953668 | 1.0530002  | 2.1261671 |
| H | -3.2002807 | -0.8449378 | 2.7019709 |
| H | -1.1667762 | -0.0968073 | 4.7167598 |
| H | -0.1257135 | 2.0898120  | 3.9715289 |
| H | -2.2878015 | 2.7100468  | 3.4410787 |
| H | -1.7656126 | 2.9279924  | 1.7543744 |
| H | 0.3614542  | 2.1900292  | 2.2706201 |
| H | -3.3155017 | 0.3704621  | 4.0086198 |
| H | -1.1306476 | -1.4595271 | 3.5905437 |

[Am-(PIPDA)<sub>2</sub>NO<sub>3</sub>](NO<sub>3</sub>)<sub>2</sub>

|   |            |            |            |
|---|------------|------------|------------|
| C | 0.4689122  | -0.1669370 | 11.4348148 |
| H | 1.4884807  | 0.2524374  | 11.4590572 |
| H | 0.1833148  | -0.3178400 | 10.3790161 |
| C | 0.4864823  | -4.6513058 | 14.5611678 |
| H | -0.2144446 | -5.4240586 | 14.2040924 |
| C | -0.4473689 | 0.8456005  | 12.1275485 |
| O | -0.8667206 | 0.6079424  | 13.2717040 |
| N | -0.7478370 | 2.0018809  | 11.4897644 |
| C | -1.5623643 | 2.9965422  | 12.2056609 |
| C | -0.3395452 | 2.3226279  | 10.1139787 |
| C | 0.1087873  | -4.2142304 | 15.9708547 |
| O | 0.1182762  | -2.9779163 | 16.2266984 |
| N | -0.1448404 | -5.1287855 | 16.9096041 |
| C | -0.2856569 | -4.7056205 | 18.3160064 |
| C | -0.2686344 | -6.5703445 | 16.6355276 |

|   |            |            |            |
|---|------------|------------|------------|
| H | -1.9752158 | 3.6828503  | 11.4502767 |
| H | -2.4141119 | 2.4712449  | 12.6624484 |
| H | 0.0472801  | 3.3503409  | 10.1244714 |
| H | 0.5105790  | 1.6891423  | 9.8274113  |
| H | -0.3367625 | -6.7310452 | 15.5546180 |
| H | -0.3372211 | -3.6116307 | 18.3094289 |
| H | 0.6440446  | -4.9801320 | 18.8416155 |
| C | -2.0685298 | 0.6775756  | 16.4274094 |
| C | 3.1550831  | -0.7229236 | 17.2290651 |
| H | 3.8044466  | 0.1234580  | 17.4995024 |
| H | 3.2723201  | -1.4846106 | 18.0250677 |
| C | -2.7190072 | -0.5256680 | 15.7239654 |
| O | -1.9693725 | -1.2786897 | 15.0761262 |
| N | -4.0508988 | -0.7113808 | 15.7634225 |
| C | -4.6342209 | -1.8470219 | 15.0075967 |
| C | -4.9913061 | 0.1341762  | 16.5129668 |
| C | 3.6555422  | -1.3410994 | 15.9300561 |
| O | 2.8410720  | -1.5567030 | 14.9951017 |
| N | 4.9641466  | -1.6030773 | 15.7904301 |
| C | 5.9112997  | -1.5429207 | 16.9123462 |
| C | 5.4985595  | -1.9755136 | 14.4682287 |
| H | -3.9666639 | -2.7178626 | 15.0988163 |
| H | -4.5223560 | 1.1014057  | 16.7408451 |
| H | 4.6398278  | -2.0381658 | 13.7924599 |
| H | 6.1190271  | -1.1355008 | 14.1114029 |
| H | 6.3647252  | -2.5414300 | 17.0093277 |
| H | 5.3558451  | -1.4078017 | 17.8470907 |
| H | 1.4952550  | -5.0869020 | 14.6268584 |
| N | 2.9636153  | 1.1262111  | 13.7184489 |
| O | 3.4276494  | 0.6801148  | 12.6673846 |
| O | 1.7301269  | 0.8747252  | 14.0111729 |
| O | 3.6172968  | 1.8249418  | 14.4960121 |
| N | -3.0084140 | -5.6322343 | 14.1851142 |
| O | -4.1761947 | -5.8368061 | 13.8372416 |
| O | -2.7279597 | -4.6361415 | 14.9258101 |
| O | -2.0813662 | -6.3867400 | 13.8043105 |
| N | 3.2410665  | -3.9362308 | 18.6737822 |
| O | 2.9031088  | -4.9622879 | 19.2815259 |
| O | 3.6919982  | -2.9449483 | 19.3016494 |
| O | 3.1206611  | -3.8646284 | 17.4158558 |
| C | -0.5580645 | -0.4508562 | 17.9654944 |
| C | 0.9225652  | -0.8133026 | 18.2324842 |
| N | 1.7530178  | -0.2775053 | 17.1397804 |
| C | 1.6286690  | 1.1936886  | 17.1445370 |
| C | 0.1521879  | 1.5967921  | 16.9023604 |
| N | -0.6723948 | 0.3856575  | 16.7502246 |
| H | -0.9957666 | 0.0895382  | 18.8287394 |
| H | 1.2567133  | -0.4042480 | 19.2054980 |

|    |            |            |            |
|----|------------|------------|------------|
| H  | 1.9791550  | 1.5937568  | 18.1172120 |
| H  | -0.2279156 | 2.2234138  | 17.7352541 |
| C  | 1.6564999  | -3.5387218 | 12.7069548 |
| C  | 1.6730553  | -2.2440429 | 11.8524246 |
| N  | 0.4763845  | -1.4355803 | 12.1566244 |
| C  | -0.7343859 | -2.2369625 | 11.8968321 |
| C  | -0.7466794 | -3.4712582 | 12.8223703 |
| N  | 0.5025544  | -3.5100853 | 13.6211686 |
| H  | 1.6129686  | -4.4351625 | 12.0575962 |
| H  | 2.5578087  | -1.6328585 | 12.0793348 |
| H  | -1.6169978 | -1.6104155 | 12.0835421 |
| H  | -1.5934085 | -3.4498884 | 13.5213171 |
| H  | 2.5730473  | -3.6009826 | 13.3076585 |
| H  | -0.8442508 | -4.4042119 | 12.2384909 |
| H  | -0.7594297 | -2.5358690 | 10.8290627 |
| H  | 1.7023784  | -2.4917356 | 10.7721180 |
| H  | 2.2686710  | 1.6065708  | 16.3551786 |
| H  | 0.0682177  | 2.1862376  | 15.9788134 |
| H  | 1.0519777  | -1.9000039 | 18.2664151 |
| H  | -1.1457983 | -1.3656155 | 17.8089224 |
| H  | -2.0925814 | 1.5058237  | 15.6995715 |
| H  | -2.6216113 | 1.0054202  | 17.3231736 |
| H  | -1.2502576 | -6.8808154 | 17.0219793 |
| H  | -5.8270141 | 0.3613801  | 15.8367150 |
| H  | -5.5746386 | -2.1037339 | 15.5152863 |
| Am | 0.5037098  | -1.1015655 | 14.8202214 |
| C  | 6.3253878  | -3.2739191 | 14.4170749 |
| H  | 7.1439591  | -3.1834844 | 15.1542777 |
| C  | 7.0355313  | -0.4927004 | 16.7730351 |
| H  | 7.6075849  | -0.7380551 | 15.8586362 |
| C  | 7.0322563  | -3.3901613 | 13.0455371 |
| H  | 7.7544792  | -4.2233280 | 13.0943479 |
| H  | 7.6448483  | -2.4825359 | 12.8930529 |
| C  | 6.1385379  | -3.5903866 | 11.8143877 |
| H  | 5.5405337  | -4.5123966 | 11.9298790 |
| H  | 5.4099265  | -2.7626925 | 11.7313425 |
| C  | 6.9329842  | -3.6774062 | 10.5059785 |
| H  | 7.5373157  | -2.7594692 | 10.3872604 |
| H  | 7.6607030  | -4.5066733 | 10.5786164 |
| C  | 6.0564627  | -3.8745811 | 9.2679162  |
| H  | 5.4677000  | -4.8054340 | 9.3361776  |
| H  | 5.3434930  | -3.0411511 | 9.1443837  |
| H  | 6.6605120  | -3.9318668 | 8.3479141  |
| C  | 5.4943420  | -4.5078338 | 14.8132488 |
| H  | 4.9703076  | -4.2998882 | 15.7614747 |
| H  | 4.6928379  | -4.6622326 | 14.0681464 |
| C  | 6.3067809  | -5.7959800 | 14.9628990 |
| H  | 6.7655701  | -6.1216303 | 14.0146326 |

|   |             |            |            |
|---|-------------|------------|------------|
| H | 7.1208047   | -5.6713619 | 15.6978021 |
| H | 5.6691224   | -6.6200395 | 15.3183479 |
| C | -5.5757587  | -0.4762786 | 17.8096680 |
| H | -6.0729711  | -1.4225954 | 17.5284572 |
| C | -6.6610512  | 0.4851290  | 18.3617810 |
| H | -6.2296073  | 1.0975124  | 19.1755215 |
| H | -6.9458338  | 1.2094614  | 17.5765083 |
| C | -7.9460652  | -0.1912164 | 18.8578556 |
| H | -7.7056833  | -0.9331349 | 19.6382287 |
| H | -8.3937836  | -0.7673465 | 18.0262891 |
| C | -8.9826221  | 0.7965164  | 19.4019065 |
| H | -8.5348750  | 1.3708302  | 20.2342259 |
| H | -9.2195407  | 1.5405510  | 18.6191174 |
| C | -4.4783066  | -0.8156087 | 18.8342176 |
| H | -3.7118435  | -1.4321900 | 18.3349125 |
| H | -3.9751940  | 0.1225001  | 19.1377756 |
| C | -4.9502268  | -1.5573791 | 20.0864825 |
| H | -5.6383548  | -0.9505470 | 20.6964557 |
| H | -5.4685396  | -2.4948242 | 19.8252260 |
| H | -4.0940786  | -1.8232805 | 20.7266642 |
| C | -10.2730483 | 0.1280262  | 19.8795522 |
| H | -10.0745794 | -0.5938346 | 20.6896295 |
| H | -10.9939208 | 0.8680781  | 20.2626282 |
| H | -10.7662637 | -0.4236892 | 19.0613602 |
| C | -4.9054503  | -1.5818389 | 13.5087774 |
| H | -3.9208969  | -1.3989620 | 13.0406763 |
| C | -5.7710974  | -0.3312507 | 13.2545384 |
| H | -6.7326445  | -0.4289139 | 13.7920659 |
| H | -5.2667436  | 0.5481825  | 13.6940682 |
| C | -5.4670446  | -2.8713567 | 12.8621150 |
| H | -5.4362153  | -2.7519036 | 11.7655592 |
| H | -4.7960542  | -3.7118631 | 13.0990006 |
| C | -6.8848488  | -3.2806626 | 13.2762946 |
| H | -6.9546028  | -3.4964377 | 14.3548041 |
| H | -7.6436184  | -2.5169875 | 13.0337173 |
| H | -7.1718581  | -4.2082940 | 12.7569791 |
| C | -6.0649586  | -0.0166849 | 11.7833093 |
| H | -6.6382473  | -0.8425915 | 11.3278204 |
| H | -5.1138465  | 0.0335929  | 11.2196728 |
| C | -6.8420806  | 1.2909069  | 11.5889958 |
| H | -7.7674468  | 1.2521888  | 12.1924909 |
| H | -6.2532817  | 2.1318711  | 12.0016577 |
| C | -7.2013827  | 1.5848188  | 10.1315532 |
| H | -7.8308300  | 0.7855674  | 9.7051880  |
| H | -7.7554231  | 2.5323519  | 10.0320785 |
| H | -6.2984220  | 1.6594680  | 9.5018437  |
| C | -0.8374621  | 3.8147995  | 13.3010612 |
| H | -0.4240781  | 3.0856526  | 14.0182904 |

|   |            |            |            |
|---|------------|------------|------------|
| C | -1.9209635 | 4.6514640  | 14.0156038 |
| H | -2.4064447 | 5.3102186  | 13.2693151 |
| H | -2.7175327 | 3.9613003  | 14.3535764 |
| C | -1.4938065 | 5.5068515  | 15.2135529 |
| H | -0.9320323 | 4.8861333  | 15.9360132 |
| H | -0.7951820 | 6.2951887  | 14.8862283 |
| C | -2.6792839 | 6.1669138  | 15.9279738 |
| H | -3.2534762 | 6.7659126  | 15.1972956 |
| H | -3.3746900 | 5.3821722  | 16.2798904 |
| C | 0.3415964  | 4.6420736  | 12.7396633 |
| H | -0.0456254 | 5.5931931  | 12.3271368 |
| H | 0.7769698  | 4.0999316  | 11.8859706 |
| C | 1.4920106  | 4.9147886  | 13.7169731 |
| H | 2.2895879  | 5.4922114  | 13.2220634 |
| H | 1.1760153  | 5.4870697  | 14.6011210 |
| H | 1.9434714  | 3.9739289  | 14.0705870 |
| C | -2.2692015 | 7.0538246  | 17.1048087 |
| H | -3.1456317 | 7.5105762  | 17.5920436 |
| H | -1.7243835 | 6.4784000  | 17.8725567 |
| H | -1.6064111 | 7.8727074  | 16.7778563 |
| C | -1.4482612 | 2.2182950  | 9.0408964  |
| H | -2.2940337 | 2.8537181  | 9.3683790  |
| C | -0.9302770 | 2.7875314  | 7.7021053  |
| H | -1.6589150 | 2.5394114  | 6.9128670  |
| H | -0.0017827 | 2.2534496  | 7.4273438  |
| C | -0.7001708 | 4.3057358  | 7.6664649  |
| H | 0.1077997  | 4.5943533  | 8.3634116  |
| H | -1.6128808 | 4.8080860  | 8.0357180  |
| C | -0.3635696 | 4.8625875  | 6.2737315  |
| H | -0.3575538 | 5.9650785  | 6.3325007  |
| H | -1.1801320 | 4.6045622  | 5.5741884  |
| C | 0.9730888  | 4.3886863  | 5.6965395  |
| H | 0.9913386  | 3.2994048  | 5.5294586  |
| H | 1.1790518  | 4.8693403  | 4.7265236  |
| H | 1.8100568  | 4.6345340  | 6.3723423  |
| C | -1.9820398 | 0.7803393  | 8.8931403  |
| H | -1.1863027 | 0.1439939  | 8.4621441  |
| H | -2.1890275 | 0.3761093  | 9.8987628  |
| C | -3.2544324 | 0.6418804  | 8.0529073  |
| H | -4.0697581 | 1.2644678  | 8.4580172  |
| H | -3.1008006 | 0.9377078  | 7.0032188  |
| H | -3.6075179 | -0.4013165 | 8.0479887  |
| C | -1.5116825 | -5.2566005 | 19.0724967 |
| H | -1.4296784 | -6.3579123 | 19.1148097 |
| C | -1.3962233 | -4.7456145 | 20.5255106 |
| H | -1.4696822 | -3.6404444 | 20.5177872 |
| H | -0.3775620 | -4.9693396 | 20.8906541 |
| C | -2.4045019 | -5.2993213 | 21.5371257 |

|   |            |             |            |
|---|------------|-------------|------------|
| H | -2.3882986 | -6.4047428  | 21.5068499 |
| H | -3.4301039 | -5.0048044  | 21.2542799 |
| C | -2.1356832 | -4.8311293  | 22.9719495 |
| H | -2.1484837 | -3.7254190  | 23.0012582 |
| H | -1.1106407 | -5.1238707  | 23.2631788 |
| C | -3.1348245 | -5.3795771  | 23.9921553 |
| H | -2.9161064 | -5.0183202  | 25.0103341 |
| H | -4.1676208 | -5.0775527  | 23.7464533 |
| H | -3.1143453 | -6.4822981  | 24.0200104 |
| C | -2.8401264 | -4.8942346  | 18.3664275 |
| H | -3.1763502 | -3.9052018  | 18.7318415 |
| H | -2.6592833 | -4.7693565  | 17.2863708 |
| C | -3.9745353 | -5.9146395  | 18.5176493 |
| H | -4.2973645 | -6.0544785  | 19.5610140 |
| H | -4.8542635 | -5.6060301  | 17.9299873 |
| H | -3.6683332 | -6.9027871  | 18.1339691 |
| C | 0.8207771  | -7.4669451  | 17.2592023 |
| H | 0.8540926  | -7.2523971  | 18.3423657 |
| C | 0.4043631  | -8.9513019  | 17.0806599 |
| H | -0.6593896 | -9.0094907  | 16.7858707 |
| H | 0.9621355  | -9.3875999  | 16.2321441 |
| C | 0.5978742  | -9.8293052  | 18.3239553 |
| H | 1.6449503  | -9.7677150  | 18.6682337 |
| H | -0.0108248 | -9.4193651  | 19.1522639 |
| C | 0.2235581  | -11.2983547 | 18.1035377 |
| H | -0.8234119 | -11.3582174 | 17.7525797 |
| H | 0.8371678  | -11.7091179 | 17.2803312 |
| C | 0.3957240  | -12.1679872 | 19.3505562 |
| H | 1.4404601  | -12.1572927 | 19.7053146 |
| H | -0.2354550 | -11.8077868 | 20.1809014 |
| H | 0.1211260  | -13.2176647 | 19.1555908 |
| C | 2.2159830  | -7.1485728  | 16.6915795 |
| H | 2.2087296  | -7.3674599  | 15.6055440 |
| H | 2.4098507  | -6.0713013  | 16.8130468 |
| C | 3.3692269  | -7.8998807  | 17.3588149 |
| H | 3.4032675  | -7.6748540  | 18.4366327 |
| H | 3.2994914  | -8.9926397  | 17.2288097 |
| H | 4.3346810  | -7.5805157  | 16.9346503 |
| C | 6.4610491  | 0.9262623   | 16.5999942 |
| H | 5.6800750  | 0.9033313   | 15.8210117 |
| H | 5.9468347  | 1.2139181   | 17.5373433 |
| C | 8.0004118  | -0.6448824  | 17.9769380 |
| H | 7.6810768  | 0.0403477   | 18.7827354 |
| H | 7.8906053  | -1.6595115  | 18.3992343 |
| C | 9.4841818  | -0.4265334  | 17.6631072 |
| H | 9.6872824  | 0.5828123   | 17.2743630 |
| H | 10.1018912 | -0.5641595  | 18.5655769 |
| H | 9.8396564  | -1.1477201  | 16.9075176 |



|   |           |           |            |
|---|-----------|-----------|------------|
| C | 7.4595358 | 2.0277641 | 16.2237477 |
| H | 8.1992362 | 2.1704446 | 17.0314168 |
| H | 8.0372701 | 1.7072845 | 15.3360400 |
| C | 6.7838531 | 3.3710822 | 15.9230193 |
| H | 6.0355971 | 3.2266046 | 15.1241222 |
| H | 6.2113994 | 3.6941092 | 16.8126900 |
| C | 7.7680222 | 4.4724999 | 15.5240025 |
| H | 8.3279542 | 4.1996248 | 14.6129359 |
| H | 7.2504965 | 5.4244234 | 15.3208561 |
| H | 8.5090436 | 4.6604955 | 16.3199219 |

[Eu-(PIPDA)<sub>2</sub>NO<sub>3</sub>](NO<sub>3</sub>)<sub>2</sub>

|   |            |            |            |
|---|------------|------------|------------|
| C | 0.4581443  | -0.1680374 | 11.4725789 |
| H | 1.4810177  | 0.2425233  | 11.5008148 |
| H | 0.1723149  | -0.3110486 | 10.4158738 |
| C | 0.4531725  | -4.6529237 | 14.5786930 |
| H | -0.2458685 | -5.4296395 | 14.2268501 |
| C | -0.4505472 | 0.8453862  | 12.1714265 |
| O | -0.8731959 | 0.6009199  | 13.3127431 |
| N | -0.7402988 | 2.0081972  | 11.5409838 |
| C | -1.5502130 | 3.0054707  | 12.2579585 |
| C | -0.3182162 | 2.3368512  | 10.1711014 |
| C | 0.0805880  | -4.2025561 | 15.9837649 |
| O | 0.0950509  | -2.9641495 | 16.2243925 |
| N | -0.1752513 | -5.1075689 | 16.9315866 |
| C | -0.3039651 | -4.6700685 | 18.3342177 |
| C | -0.3011458 | -6.5533017 | 16.6764342 |
| H | -1.9497085 | 3.7012128  | 11.5040993 |
| H | -2.4111931 | 2.4859415  | 12.7043410 |
| H | 0.0802970  | 3.3600110  | 10.1942531 |
| H | 0.5267759  | 1.6964532  | 9.8847999  |
| H | -0.4208202 | -6.7243710 | 15.6007628 |
| H | -0.3627069 | -3.5769644 | 18.3154983 |
| H | 0.6313304  | -4.9356399 | 18.8543460 |
| C | -2.0766217 | 0.6506952  | 16.3999520 |
| C | 3.1185645  | -0.7925148 | 17.2230264 |
| H | 3.7782644  | 0.0436016  | 17.4995999 |
| H | 3.2324464  | -1.5635910 | 18.0096240 |
| C | -2.7227578 | -0.5491300 | 15.6886633 |
| O | -1.9693937 | -1.3028594 | 15.0470858 |
| N | -4.0561967 | -0.7283815 | 15.7148997 |
| C | -4.6378036 | -1.8558462 | 14.9465541 |
| C | -4.9996140 | 0.1134007  | 16.4652356 |
| C | 3.6056001  | -1.4023486 | 15.9151332 |
| O | 2.7813066  | -1.6079077 | 14.9878145 |
| N | 4.9142801  | -1.6588943 | 15.7597409 |

|   |            |            |            |
|---|------------|------------|------------|
| C | 5.8700479  | -1.6145616 | 16.8752182 |
| C | 5.4390757  | -2.0014320 | 14.4261061 |
| H | -3.9818008 | -2.7338725 | 15.0490193 |
| H | -4.5296419 | 1.0768319  | 16.7064556 |
| H | 4.5740683  | -2.0646216 | 13.7585922 |
| H | 6.0435085  | -1.1465335 | 14.0764946 |
| H | 6.3272951  | -2.6132395 | 16.9519744 |
| H | 5.3205216  | -1.4990971 | 17.8161842 |
| H | 1.4618571  | -5.0870484 | 14.6457332 |
| N | 2.9463851  | 1.0703610  | 13.7529408 |
| O | 3.4155758  | 0.6295152  | 12.7020373 |
| O | 1.7115013  | 0.8212427  | 14.0381157 |
| O | 3.5984431  | 1.7629539  | 14.5373854 |
| N | -3.0354986 | -5.6474106 | 14.1831109 |
| O | -4.1965184 | -5.8374378 | 13.8055071 |
| O | -2.7630145 | -4.6613998 | 14.9374928 |
| O | -2.1076901 | -6.4081945 | 13.8173423 |
| N | 3.2280879  | -4.0265132 | 18.6029411 |
| O | 2.9020472  | -5.0653596 | 19.1964812 |
| O | 3.7126748  | -3.0570181 | 19.2386506 |
| O | 3.0589835  | -3.9200825 | 17.3533738 |
| C | -0.5899675 | -0.4898942 | 17.9492917 |
| C | 0.8859406  | -0.8597232 | 18.2276966 |
| N | 1.7231263  | -0.3296446 | 17.1396369 |
| C | 1.6144270  | 1.1414810  | 17.1494592 |
| C | 0.1431445  | 1.5562332  | 16.9004955 |
| N | -0.6862186 | 0.3506960  | 16.7356814 |
| H | -1.0338743 | 0.0501081  | 18.8094697 |
| H | 1.2158247  | -0.4494465 | 19.2019203 |
| H | 1.9633259  | 1.5351914  | 18.1253696 |
| H | -0.2395055 | 2.1799999  | 17.7342589 |
| C | 1.6231006  | -3.5499800 | 12.7234362 |
| C | 1.6462418  | -2.2538747 | 11.8747027 |
| N | 0.4554715  | -1.4404093 | 12.1870300 |
| C | -0.7633668 | -2.2291248 | 11.9253698 |
| C | -0.7804417 | -3.4710048 | 12.8398214 |
| N | 0.4684022  | -3.5172043 | 13.6346833 |
| H | 1.5761983  | -4.4447329 | 12.0718170 |
| H | 2.5338421  | -1.6475743 | 12.1026369 |
| H | -1.6382998 | -1.5958632 | 12.1243221 |
| H | -1.6250543 | -3.4500784 | 13.5407395 |
| H | 2.5366081  | -3.6177412 | 13.3274266 |
| H | -0.8823909 | -4.3994574 | 12.2491615 |
| H | -0.7964674 | -2.5174413 | 10.8550222 |
| H | 1.6704862  | -2.4952463 | 10.7929517 |
| H | 2.2624114  | 1.5501751  | 16.3650198 |
| H | 0.0689322  | 2.1505843  | 15.9796753 |
| H | 1.0102905  | -1.9465395 | 18.2625573 |

|    |            |            |            |
|----|------------|------------|------------|
| H  | -1.1802575 | -1.4007885 | 17.7816466 |
| H  | -2.0894924 | 1.4784406  | 15.6716647 |
| H  | -2.6368396 | 0.9801547  | 17.2904424 |
| H  | -1.2614367 | -6.8630028 | 17.1124795 |
| H  | -5.8299024 | 0.3497932  | 15.7852766 |
| H  | -5.5899686 | -2.1042501 | 15.4361641 |
| Eu | 0.4783659  | -1.1206441 | 14.8225871 |
| C  | 6.2839278  | -3.2859631 | 14.3412637 |
| H  | 7.1125969  | -3.1949548 | 15.0670247 |
| C  | 6.9916844  | -0.5593852 | 16.7496310 |
| H  | 7.5671601  | -0.7921501 | 15.8340022 |
| C  | 6.9700973  | -3.3681051 | 12.9565077 |
| H  | 7.7048408  | -4.1915680 | 12.9779169 |
| H  | 7.5670147  | -2.4491184 | 12.8104022 |
| C  | 6.0577154  | -3.5585934 | 11.7375063 |
| H  | 5.4745816  | -4.4908100 | 11.8465349 |
| H  | 5.3163148  | -2.7398905 | 11.6829820 |
| C  | 6.8286998  | -3.6103036 | 10.4133146 |
| H  | 7.4174763  | -2.6816345 | 10.3003186 |
| H  | 7.5693443  | -4.4302019 | 10.4564855 |
| C  | 5.9311493  | -3.7973594 | 9.1887572  |
| H  | 5.3573237  | -4.7379067 | 9.2508325  |
| H  | 5.2038152  | -2.9723804 | 9.0948456  |
| H  | 6.5176871  | -3.8284747 | 8.2562561  |
| C  | 5.4801790  | -4.5404459 | 14.7288893 |
| H  | 4.9589144  | -4.3540725 | 15.6832305 |
| H  | 4.6761930  | -4.7030279 | 13.9882788 |
| C  | 6.3225547  | -5.8118819 | 14.8554768 |
| H  | 6.7790421  | -6.1151836 | 13.8987514 |
| H  | 7.1408732  | -5.6773000 | 15.5837275 |
| H  | 5.7083635  | -6.6551116 | 15.2067877 |
| C  | -5.5941584 | -0.5095093 | 17.7512712 |
| H  | -6.0853957 | -1.4549038 | 17.4569628 |
| C  | -6.6873075 | 0.4422929  | 18.3042343 |
| H  | -6.2650739 | 1.0460201  | 19.1291400 |
| H  | -6.9676343 | 1.1750884  | 17.5252047 |
| C  | -7.9735724 | -0.2454566 | 18.7808843 |
| H  | -7.7359477 | -0.9968849 | 19.5529849 |
| H  | -8.4121426 | -0.8122665 | 17.9381222 |
| C  | -9.0189065 | 0.7298140  | 19.3304516 |
| H  | -8.5793360 | 1.2965848  | 20.1722320 |
| H  | -9.2558108 | 1.4818505  | 18.5553298 |
| C  | -4.5044698 | -0.8544291 | 18.7820357 |
| H  | -3.7297432 | -1.4601720 | 18.2825287 |
| H  | -4.0100353 | 0.0829410  | 19.1014740 |
| C  | -4.9832715 | -1.6140756 | 20.0208351 |
| H  | -5.6801677 | -1.0187714 | 20.6321593 |
| H  | -5.4937834 | -2.5510605 | 19.7434206 |

|   |             |            |            |
|---|-------------|------------|------------|
| H | -4.1311921  | -1.8829156 | 20.6651108 |
| C | -10.3079399 | 0.0478496  | 19.7925662 |
| H | -10.1095262 | -0.6824672 | 20.5950417 |
| H | -11.0355519 | 0.7787447  | 20.1804445 |
| H | -10.7931266 | -0.4970049 | 18.9650308 |
| C | -4.8798350  | -1.5796424 | 13.4451543 |
| H | -3.8868055  | -1.3907774 | 12.9981985 |
| C | -5.7414071  | -0.3266009 | 13.1897144 |
| H | -6.7107559  | -0.4294782 | 13.7121338 |
| H | -5.2427660  | 0.5472548  | 13.6465676 |
| C | -5.4268285  | -2.8628225 | 12.7745459 |
| H | -5.3706510  | -2.7340004 | 11.6799733 |
| H | -4.7622320  | -3.7058442 | 13.0207081 |
| C | -6.8531952  | -3.2756376 | 13.1539681 |
| H | -6.9455701  | -3.5011999 | 14.2287572 |
| H | -7.6062631  | -2.5095055 | 12.9019830 |
| H | -7.1289893  | -4.1985173 | 12.6202643 |
| C | -6.0145014  | 0.0055026  | 11.7184730 |
| H | -6.5824309  | -0.8140065 | 11.2449600 |
| H | -5.0558885  | 0.0620148  | 11.1681871 |
| C | -6.7879480  | 1.3164274  | 11.5312904 |
| H | -7.7203595  | 1.2713121  | 12.1234068 |
| H | -6.2031706  | 2.1511233  | 11.9619139 |
| C | -7.1302578  | 1.6299967  | 10.0739526 |
| H | -7.7571647  | 0.8382225  | 9.6302940  |
| H | -7.6804248  | 2.5803966  | 9.9807077  |
| H | -6.2202933  | 1.7100378  | 9.4553363  |
| C | -0.8276437  | 3.8090878  | 13.3654269 |
| H | -0.4509611  | 3.0723347  | 14.0943532 |
| C | -1.9038472  | 4.6778029  | 14.0519167 |
| H | -2.3497808  | 5.3497072  | 13.2927762 |
| H | -2.7287313  | 4.0121651  | 14.3703992 |
| C | -1.4817333  | 5.5221317  | 15.2593719 |
| H | -0.9627049  | 4.8847100  | 15.9992098 |
| H | -0.7470436  | 6.2843632  | 14.9500704 |
| C | -2.6631678  | 6.2257917  | 15.9378290 |
| H | -3.1954239  | 6.8413474  | 15.1892518 |
| H | -3.3950322  | 5.4672621  | 16.2726827 |
| C | 0.3874478   | 4.6005024  | 12.8299861 |
| H | 0.0389341   | 5.5627701  | 12.4088343 |
| H | 0.8259240   | 4.0444775  | 11.9869469 |
| C | 1.5223782   | 4.8380276  | 13.8341792 |
| H | 2.3491519   | 5.3897681  | 13.3582592 |
| H | 1.2035028   | 5.4203208  | 14.7107421 |
| H | 1.9359119   | 3.8831808  | 14.1967278 |
| C | -2.2552916  | 7.1033209  | 17.1224835 |
| H | -3.1282593  | 7.5935965  | 17.5826034 |
| H | -1.7535895  | 6.5127760  | 17.9078965 |

|   |            |            |            |
|---|------------|------------|------------|
| H | -1.5544025 | 7.8961767  | 16.8113099 |
| C | -1.4192732 | 2.2548283  | 9.0885522  |
| H | -2.2594564 | 2.8986210  | 9.4140599  |
| C | -0.8835277 | 2.8276017  | 7.7584407  |
| H | -1.6130384 | 2.6016500  | 6.9633456  |
| H | 0.0357022  | 2.2781787  | 7.4827048  |
| C | -0.6233986 | 4.3412580  | 7.7394233  |
| H | 0.1892942  | 4.6060932  | 8.4402491  |
| H | -1.5263943 | 4.8578476  | 8.1130301  |
| C | -0.2736087 | 4.9059533  | 6.3531120  |
| H | -0.2441056 | 6.0073519  | 6.4238408  |
| H | -1.0947662 | 4.6728908  | 5.6502392  |
| C | 1.0532189  | 4.4098074  | 5.7719515  |
| H | 1.0483355  | 3.3222367  | 5.5931907  |
| H | 1.2704573  | 4.8962628  | 4.8073026  |
| H | 1.8945377  | 4.6305674  | 6.4510054  |
| C | -1.9701338 | 0.8249996  | 8.9248624  |
| H | -1.1786768 | 0.1816591  | 8.4964329  |
| H | -2.1919866 | 0.4157568  | 9.9254022  |
| C | -3.2357749 | 0.7097278  | 8.0711075  |
| H | -4.0458304 | 1.3418328  | 8.4717633  |
| H | -3.0675266 | 1.0092844  | 7.0247256  |
| H | -3.6040410 | -0.3280833 | 8.0567009  |
| C | -1.5186437 | -5.2180530 | 19.1107851 |
| H | -1.4220661 | -6.3167519 | 19.1790520 |
| C | -1.4010520 | -4.6707755 | 20.5502120 |
| H | -1.4955224 | -3.5676966 | 20.5167180 |
| H | -0.3754373 | -4.8671665 | 20.9120037 |
| C | -2.3895725 | -5.2199814 | 21.5835406 |
| H | -2.3441901 | -6.3250092 | 21.5854672 |
| H | -3.4238912 | -4.9607757 | 21.2980431 |
| C | -2.1263631 | -4.7024030 | 23.0021942 |
| H | -2.1755337 | -3.5973100 | 22.9998635 |
| H | -1.0902960 | -4.9529793 | 23.2938707 |
| C | -3.0995801 | -5.2535478 | 24.0457782 |
| H | -2.8869217 | -4.8541118 | 25.0508897 |
| H | -4.1437522 | -4.9947247 | 23.7988692 |
| H | -3.0407217 | -6.3535513 | 24.1068516 |
| C | -2.8552585 | -4.8880136 | 18.4044471 |
| H | -3.2017260 | -3.8956143 | 18.7498391 |
| H | -2.6808061 | -4.7837374 | 17.3212066 |
| C | -3.9765646 | -5.9180109 | 18.5843149 |
| H | -4.2929373 | -6.0373716 | 19.6322101 |
| H | -4.8627330 | -5.6330377 | 17.9943333 |
| H | -3.6605669 | -6.9111736 | 18.2221882 |
| C | 0.8226489  | -7.4339630 | 17.2633319 |
| H | 0.9541413  | -7.1485700 | 18.3217893 |
| C | 0.3794045  | -8.9195336 | 17.2248444 |

H -0.7178608 -8.9809905 17.1052656  
H 0.7956608 -9.4060762 16.3234530  
C 0.7646917 -9.7273282 18.4713907  
H 1.8501026 -9.6444634 18.6501763  
H 0.2851526 -9.2689036 19.3568794  
C 0.3776415 -11.2077271 18.4006171  
H -0.7127109 -11.2949802 18.2370202  
H 0.8497107 -11.6646726 17.5111452  
C 0.7738381 -11.9967697 19.6501660  
H 1.8638946 -11.9580131 19.8168323  
H 0.2906142 -11.5866131 20.5534328  
H 0.4865349 -13.0581016 19.5721386  
C 2.1661058 -7.1700409 16.5583530  
H 2.0472512 -7.4095031 15.4835260  
H 2.3925427 -6.0954371 16.6419087  
C 3.3654120 -7.9353466 17.1207394  
H 3.5061558 -7.7053767 18.1888234  
H 3.2688412 -9.0272554 17.0034693  
H 4.2891967 -7.6340385 16.6013889  
C 6.4139786 0.8599858 16.5925451  
H 5.6310157 0.8427556 15.8158639  
H 5.9017957 1.1377065 17.5339912  
C 7.9521153 -0.7248312 17.9552517  
H 7.6199535 -0.0591743 18.7723148  
H 7.8504785 -1.7487357 18.3566548  
C 9.4357763 -0.4852156 17.6568562  
H 9.6324711 0.5343845 17.2926074  
H 10.0478503 -0.6372052 18.5609048  
H 9.8040587 -1.1859295 16.8882288  
C 7.4082916 1.9676193 16.2231864  
H 8.1517583 2.1042285 17.0283851  
H 7.9823555 1.6573098 15.3295009  
C 6.7282720 3.3124029 15.9394478  
H 5.9744171 3.1733859 15.1449437  
H 6.1619527 3.6264216 16.8362450  
C 7.7075010 4.4190215 15.5427826  
H 8.2613222 4.1547103 14.6254773  
H 7.1868657 5.3716970 15.3513222  
H 8.4538982 4.6017590 16.3348811

[Am-(DADA)<sub>2</sub>NO<sub>3</sub>](NO<sub>3</sub>)<sub>2</sub>

C -1.9576175 -1.1865016 -1.8506688  
N -1.7607303 -1.3065361 -0.3569017  
C -0.3836058 -1.7524615 -0.0386673  
C 0.6444128 -0.6821808 -0.3430892

|   |            |            |            |
|---|------------|------------|------------|
| N | 1.9194465  | -1.0527837 | -0.5187454 |
| C | -2.7074440 | -2.2962225 | 0.2345178  |
| C | -2.9351003 | -2.0825071 | 1.7210748  |
| N | -3.6942830 | -0.8427830 | 2.0432150  |
| C | -3.7277982 | -0.6808488 | 3.5028486  |
| C | -3.5708575 | 0.7595763  | 3.9826205  |
| N | -4.1339279 | 1.1343096  | 5.1553811  |
| C | -5.1657713 | 0.3249914  | 5.8344948  |
| O | 0.2450347  | 0.5216053  | -0.3828684 |
| C | 2.9480149  | -0.0761311 | -0.9222800 |
| C | -5.0835086 | -0.8462413 | 1.4469964  |
| O | -2.8192569 | 1.5162039  | 3.3338377  |
| C | -3.7538686 | 2.4335088  | 5.7536013  |
| H | -2.3290955 | -3.3230555 | 0.0904280  |
| H | -3.6584019 | -2.2314776 | -0.3089989 |
| H | -3.4168229 | -2.9853009 | 2.1333064  |
| H | -1.9670934 | -2.0192679 | 2.2362123  |
| H | -4.9300411 | -0.7305623 | 0.3617300  |
| H | -1.1710245 | -0.4900524 | -2.1838000 |
| H | -4.5979613 | -1.1855266 | 3.9458061  |
| H | -2.8452717 | -1.1922820 | 3.9233566  |
| H | -0.3192216 | -1.9962043 | 1.0332484  |
| H | -0.1443499 | -2.7030503 | -0.5353103 |
| H | -3.7114802 | 2.2876779  | 6.8458389  |
| H | -2.7301076 | 2.6370305  | 5.4118868  |
| H | -5.8367920 | -0.0890117 | 5.0662807  |
| H | -5.7826025 | 1.0273547  | 6.4091608  |
| H | 2.5584466  | 0.9306438  | -0.7233291 |
| H | 3.8120809  | -0.2382966 | -0.2581477 |
| C | 2.4385267  | -2.3198831 | 0.0887718  |
| H | 3.1479674  | -1.9878356 | 0.8687439  |
| H | 1.6256921  | -2.8350116 | 0.6206950  |
| C | 0.6438061  | 4.6921339  | -1.2812511 |
| N | -0.2755874 | 4.3509259  | -0.1531663 |
| C | -1.6476340 | 4.6935137  | -0.4904440 |
| C | -2.3489335 | 3.6509649  | -1.3704666 |
| N | -3.2244553 | 4.0874975  | -2.3107875 |
| C | 0.1284891  | 4.8601542  | 1.1648239  |
| C | -0.2253608 | 3.9970798  | 2.3915888  |
| N | 0.3662095  | 2.6320529  | 2.4275266  |
| C | 0.2008529  | 2.0309472  | 3.7703322  |
| C | 0.1653425  | 0.5015309  | 3.7046651  |
| N | 0.7807682  | -0.2719568 | 4.6010360  |
| C | 1.8078435  | 0.1869914  | 5.5877105  |
| O | -2.1636818 | 2.4360732  | -1.1365230 |
| C | -4.1914171 | 3.1734813  | -2.9533455 |
| C | 1.8277056  | 2.6359282  | 2.0398112  |
| O | -0.5258471 | 0.0152617  | 2.7542145  |

|   |            |            |            |
|---|------------|------------|------------|
| C | 0.8921647  | -1.7415097 | 4.3396978  |
| H | -0.3176663 | 5.8580018  | 1.3664954  |
| H | 1.2124134  | 5.0248550  | 1.1455994  |
| H | 0.0970390  | 4.5831724  | 3.2772653  |
| H | -1.3214944 | 3.9107095  | 2.4790390  |
| H | 1.8314802  | 2.9811725  | 1.0022525  |
| H | 0.0489363  | 4.4816783  | -2.1877768 |
| H | 0.9720884  | 2.3958501  | 4.4566022  |
| H | -0.7783811 | 2.3380927  | 4.1711369  |
| H | -2.2518510 | 4.7133733  | 0.4322687  |
| H | -1.7192107 | 5.7078938  | -0.9178970 |
| H | 1.9569225  | -1.8941795 | 4.0862256  |
| H | 0.3139632  | -1.9848737 | 3.4431187  |
| H | 2.7043867  | 0.4844199  | 5.0165848  |
| H | 2.1128806  | -0.7307685 | 6.1070616  |
| H | -3.8774054 | 2.1497065  | -2.7192498 |
| H | -4.0913375 | 3.2989710  | -4.0449210 |
| C | -3.3370166 | 5.4974954  | -2.7445048 |
| H | -4.2690798 | 5.5628375  | -3.3203295 |
| H | -3.4884192 | 6.1498250  | -1.8693738 |
| N | -4.1229400 | 3.6592719  | 1.7823050  |
| O | -3.4592336 | 4.6156135  | 2.2024555  |
| O | -3.5233797 | 2.7645519  | 1.0690379  |
| O | -5.3261413 | 3.5453499  | 1.9856208  |
| N | 4.7096263  | -0.4109212 | 2.9225140  |
| O | 3.9476196  | -1.4085206 | 2.9828499  |
| O | 5.3178290  | -0.1491641 | 1.8653038  |
| O | 4.8255182  | 0.3442609  | 3.9199698  |
| N | -0.7269518 | -4.6189299 | 1.5373925  |
| O | -0.6957965 | -4.9009840 | 0.3165148  |
| O | 0.1939141  | -3.9142771 | 2.0371480  |
| O | -1.6773488 | -4.9935273 | 2.2489873  |
| C | -3.3052508 | -0.5384683 | -2.1740178 |
| H | -3.5130520 | 0.3123032  | -1.5076804 |
| H | -3.2977964 | -0.1466251 | -3.2041465 |
| H | -4.1434533 | -1.2527224 | -2.1057955 |
| C | -1.7841989 | -2.5139539 | -2.6265346 |
| H | -2.5737109 | -3.2265086 | -2.3273504 |
| H | -0.8297502 | -2.9915764 | -2.3536344 |
| C | -1.8116720 | -2.3417567 | -4.1504923 |
| H | -1.5656247 | -3.2968564 | -4.6472098 |
| H | -2.8015123 | -2.0229312 | -4.5230811 |
| H | -1.0684636 | -1.5933737 | -4.4847638 |
| C | -5.8980854 | 0.3631000  | 1.9060310  |
| H | -5.3308650 | 1.3005821  | 1.8393032  |
| H | -6.7837684 | 0.4843660  | 1.2618072  |
| H | -6.2737349 | 0.2463119  | 2.9392661  |
| C | -5.8562212 | -2.1734728 | 1.6650867  |



|   |            |            |            |
|---|------------|------------|------------|
| H | -5.2975186 | -3.0100459 | 1.2152124  |
| H | -5.9162213 | -2.3994676 | 2.7472345  |
| C | -7.2726352 | -2.1871088 | 1.0773738  |
| H | -7.2687247 | -1.9048685 | 0.0078398  |
| H | -7.7059126 | -3.2005792 | 1.1487999  |
| H | -7.9566093 | -1.4989344 | 1.6034071  |
| C | 1.0433743  | 6.1879601  | -1.3316751 |
| H | 1.6765990  | 6.4271113  | -0.4580915 |
| H | 0.1369719  | 6.8131182  | -1.2265035 |
| C | 1.7894536  | 6.6023835  | -2.6056335 |
| H | 1.2284942  | 6.3219180  | -3.5163861 |
| H | 1.9404672  | 7.6964371  | -2.6321812 |
| H | 2.7860929  | 6.1324757  | -2.6706755 |
| C | 1.8618631  | 3.7697972  | -1.3633982 |
| H | 2.3386634  | 3.8508953  | -2.3555026 |
| H | 2.6334844  | 4.0216614  | -0.6149100 |
| H | 1.5471077  | 2.7257220  | -1.2184121 |
| C | 2.7178117  | 3.5916860  | 2.8774692  |
| H | 2.7044343  | 3.2892981  | 3.9404993  |
| H | 2.3180270  | 4.6204537  | 2.8493385  |
| C | 4.1844615  | 3.6136519  | 2.4169046  |
| H | 4.6953513  | 2.6587272  | 2.6287998  |
| H | 4.2663499  | 3.8166094  | 1.3315096  |
| H | 4.7343047  | 4.4129785  | 2.9454172  |
| C | 2.4066022  | 1.2334554  | 2.0566228  |
| H | 3.3720855  | 1.2178551  | 1.5372548  |
| H | 2.6172172  | 0.8891215  | 3.0748905  |
| H | 1.7462390  | 0.5164277  | 1.5630206  |
| C | -5.6713085 | 3.4244463  | -2.5001122 |
| H | -5.6785299 | 4.3809908  | -1.9458653 |
| C | -6.1512335 | 2.3516212  | -1.4911338 |
| H | -5.3868059 | 2.2724786  | -0.6991756 |
| H | -7.0547113 | 2.7353374  | -0.9802070 |
| C | -6.4605158 | 0.9519821  | -2.0745988 |
| H | -5.8569967 | 0.7740154  | -2.9858235 |
| H | -6.1261276 | 0.1837467  | -1.3547081 |
| C | -6.6634126 | 3.5804344  | -3.6758115 |
| H | -6.5855823 | 2.7046483  | -4.3484486 |
| H | -7.6824331 | 3.5438273  | -3.2520513 |
| C | -7.9393122 | 0.6706930  | -2.3901148 |
| H | -8.3386000 | 1.4358668  | -3.0788947 |
| H | -8.5263018 | 0.7696556  | -1.4562891 |
| C | -8.1701270 | -0.7163901 | -2.9957967 |
| H | -7.8126470 | -1.5170532 | -2.3210569 |
| H | -9.2425353 | -0.8998082 | -3.1893077 |
| H | -7.6335298 | -0.8299708 | -3.9566440 |
| C | -6.5551784 | 4.8639191  | -4.5042887 |
| H | -6.6482675 | 5.7634068  | -3.8677964 |

|   |            |            |            |
|---|------------|------------|------------|
| H | -5.6026013 | 4.9365074  | -5.0569457 |
| H | -7.3638008 | 4.9077411  | -5.2560821 |
| C | -2.1802289 | 6.0687664  | -3.6024629 |
| H | -1.2961682 | 6.1343417  | -2.9466152 |
| C | -2.5484287 | 7.5172382  | -3.9893710 |
| H | -3.4477692 | 7.5137052  | -4.6358087 |
| H | -2.8475120 | 8.0570226  | -3.0689567 |
| C | -1.4330842 | 8.3166830  | -4.6764198 |
| H | -1.1654300 | 7.8455910  | -5.6416879 |
| H | -0.5168093 | 8.2777363  | -4.0545362 |
| C | -1.8096432 | 9.7827308  | -4.9285147 |
| H | -2.7345390 | 9.8211071  | -5.5367883 |
| H | -2.0622123 | 10.2640048 | -3.9632124 |
| C | -0.7064770 | 10.5834513 | -5.6260229 |
| H | -0.4595213 | 10.1518968 | -6.6142303 |
| H | -1.0110560 | 11.6332361 | -5.7868580 |
| H | 0.2233544  | 10.5929800 | -5.0269270 |
| C | -1.7497806 | 5.1808217  | -4.7939585 |
| H | -0.7480873 | 5.5166015  | -5.1185883 |
| H | -1.6027647 | 4.1486020  | -4.4240453 |
| C | -2.6667586 | 5.1544502  | -6.0226730 |
| H | -3.6907207 | 4.8212516  | -5.7790211 |
| H | -2.7482124 | 6.1461697  | -6.5017931 |
| H | -2.2681731 | 4.4572761  | -6.7811014 |
| C | -4.6457181 | 3.6554603  | 5.4145511  |
| H | -4.9394329 | 3.5611811  | 4.3558648  |
| C | -4.6817630 | -0.8130952 | 6.7707527  |
| H | -3.8013019 | -1.2878738 | 6.2988104  |
| C | -3.7865646 | 4.9355791  | 5.5362597  |
| H | -2.8742213 | 4.8036017  | 4.9258145  |
| H | -3.4500321 | 5.0473190  | 6.5886671  |
| C | -4.4739383 | 6.2276746  | 5.0787546  |
| H | -4.8146856 | 6.0923527  | 4.0359483  |
| H | -5.3765436 | 6.4217460  | 5.6899635  |
| C | -3.5554548 | 7.4541855  | 5.1547135  |
| H | -2.6597451 | 7.2736102  | 4.5286441  |
| H | -3.1837974 | 7.5736293  | 6.1920602  |
| C | -4.2360743 | 8.7506619  | 4.7062665  |
| H | -3.5463305 | 9.6125703  | 4.7644507  |
| H | -4.5923268 | 8.6744829  | 3.6618442  |
| H | -5.1138121 | 8.9829500  | 5.3387817  |
| C | -5.9423526 | 3.7505811  | 6.2754172  |
| H | -5.8362955 | 4.5789734  | 7.0013355  |
| H | -6.0642348 | 2.8504166  | 6.9034975  |
| C | -7.2235945 | 3.9563445  | 5.4591853  |
| H | -7.4026313 | 3.1076609  | 4.7735676  |
| H | -8.1068847 | 4.0558682  | 6.1168785  |
| H | -7.1611436 | 4.8651708  | 4.8350673  |

|   |            |            |            |
|---|------------|------------|------------|
| C | -4.2352699 | -0.2663908 | 8.1461998  |
| H | -3.3983305 | 0.4401164  | 7.9877632  |
| H | -5.0581573 | 0.3339649  | 8.5832234  |
| C | -3.7880226 | -1.3175303 | 9.1709465  |
| H | -4.6087770 | -2.0324632 | 9.3651228  |
| H | -2.9561477 | -1.9156336 | 8.7482976  |
| C | -3.3529135 | -0.7070055 | 10.5102567 |
| H | -4.1900968 | -0.1123618 | 10.9265515 |
| H | -2.5296492 | 0.0124291  | 10.3361343 |
| C | -2.9092994 | -1.7522112 | 11.5378376 |
| H | -2.0500629 | -2.3413341 | 11.1662780 |
| H | -2.6035939 | -1.2792251 | 12.4885884 |
| H | -3.7255335 | -2.4633129 | 11.7642745 |
| C | -5.7711258 | -1.9103808 | 6.8592242  |
| H | -5.9746264 | -2.2773128 | 5.8336720  |
| H | -5.3565500 | -2.7793764 | 7.3991231  |
| C | -7.0960430 | -1.4957553 | 7.5121227  |
| H | -6.9596304 | -1.1823212 | 8.5626546  |
| H | -7.5845799 | -0.6610919 | 6.9762119  |
| H | -7.8065063 | -2.3415868 | 7.5128019  |
| C | 1.4722531  | 1.2302410  | 6.6779388  |
| H | 1.2879208  | 2.2082901  | 6.2038018  |
| C | 0.2057742  | 0.9128306  | 7.5103053  |
| H | -0.1307073 | 1.8567531  | 7.9806049  |
| H | -0.6079368 | 0.6142340  | 6.8209509  |
| C | 0.3505719  | -0.1428276 | 8.6140533  |
| H | -0.6289069 | -0.3389494 | 9.0853630  |
| H | 0.7283139  | -1.1067692 | 8.2322487  |
| H | 1.0380416  | 0.1905777  | 9.4101122  |
| C | 2.7237855  | 1.4251289  | 7.5670162  |
| H | 2.4359973  | 2.0635651  | 8.4259274  |
| H | 3.0202873  | 0.4503409  | 8.0000627  |
| C | 3.9410680  | 2.0494451  | 6.8690620  |
| H | 4.2543658  | 1.4350275  | 6.0064895  |
| H | 3.6566780  | 3.0409598  | 6.4594993  |
| C | 5.1488343  | 2.2173628  | 7.8000696  |
| H | 5.4076935  | 1.2296367  | 8.2297071  |
| H | 4.8753432  | 2.8621507  | 8.6596895  |
| C | 6.3749046  | 2.7931405  | 7.0852695  |
| H | 6.1700813  | 3.8071347  | 6.6920433  |
| H | 7.2429349  | 2.8669819  | 7.7656076  |
| H | 6.6633977  | 2.1578283  | 6.2278083  |
| C | 0.4575121  | -2.6383449 | 5.5289958  |
| H | 0.4086162  | -1.9995949 | 6.4292268  |
| C | 1.5236509  | -3.7146816 | 5.8468272  |
| H | 1.2664273  | -4.1912441 | 6.8129096  |
| H | 2.4871711  | -3.1950438 | 6.0188994  |
| C | 1.7373849  | -4.8081248 | 4.7924437  |

|   |            |            |            |
|---|------------|------------|------------|
| H | 0.7986708  | -5.3713418 | 4.6338946  |
| H | 1.9667605  | -4.3512121 | 3.8140932  |
| C | 2.8587309  | -5.7833081 | 5.1740848  |
| H | 2.6300985  | -6.2439079 | 6.1568900  |
| H | 3.8006169  | -5.2172251 | 5.3157010  |
| C | 3.0813519  | -6.8864352 | 4.1351962  |
| H | 3.8963879  | -7.5702339 | 4.4368617  |
| H | 2.1672314  | -7.4927528 | 3.9922175  |
| H | 3.3480753  | -6.4574377 | 3.1513952  |
| C | -0.9654643 | -3.1965835 | 5.3150726  |
| H | -1.0058278 | -3.7855013 | 4.3818359  |
| H | -1.6394855 | -2.3282664 | 5.1600593  |
| C | -1.5100652 | -4.0274845 | 6.4806121  |
| H | -1.4466091 | -3.4792110 | 7.4412149  |
| H | -2.5704694 | -4.2928882 | 6.3140241  |
| H | -0.9573832 | -4.9757719 | 6.6007864  |
| C | 3.4119090  | -0.1522361 | -2.3986637 |
| H | 3.7275870  | -1.1911059 | -2.6007009 |
| C | 4.6614983  | 0.7594485  | -2.5615076 |
| H | 5.0943144  | 0.9606158  | -1.5644440 |
| H | 4.3500105  | 1.7466175  | -2.9566683 |
| C | 5.7756718  | 0.1774597  | -3.4413615 |
| H | 6.6408736  | 0.8640917  | -3.4859318 |
| H | 6.1377971  | -0.7833948 | -3.0320482 |
| H | 5.4418843  | -0.0072977 | -4.4774673 |
| C | 2.2686260  | 0.1912113  | -3.3734550 |
| H | 1.9289025  | 1.2255706  | -3.1699775 |
| H | 1.4039783  | -0.4632934 | -3.1492151 |
| C | 2.5980344  | 0.0554081  | -4.8658519 |
| H | 3.4344659  | 0.7285801  | -5.1322230 |
| H | 2.9555652  | -0.9732259 | -5.0723693 |
| C | 1.4105278  | 0.3718048  | -5.7842567 |
| H | 0.5600516  | -0.2887190 | -5.5241489 |
| H | 1.0638516  | 1.4056103  | -5.5850471 |
| C | 1.7337529  | 0.2219151  | -7.2737324 |
| H | 0.8600170  | 0.4651910  | -7.9058205 |
| H | 2.5612529  | 0.8920548  | -7.5741875 |
| H | 2.0424853  | -0.8123634 | -7.5151907 |
| C | 3.1343808  | -3.3340755 | -0.8385867 |
| H | 3.9828306  | -2.8308529 | -1.3401189 |
| C | 2.1660850  | -3.8686475 | -1.9131586 |
| H | 1.3282569  | -4.3783006 | -1.3991949 |
| H | 1.7261049  | -3.0037851 | -2.4498643 |
| C | 2.7683063  | -4.8180194 | -2.9569891 |
| H | 3.6534008  | -4.3439538 | -3.4281601 |
| H | 3.1394074  | -5.7344658 | -2.4614745 |
| C | 1.7715733  | -5.2266538 | -4.0503646 |
| H | 1.3991530  | -4.3179379 | -4.5649038 |

|    |            |            |            |
|----|------------|------------|------------|
| H  | 0.8859029  | -5.6913412 | -3.5752543 |
| C  | 2.3606157  | -6.1915874 | -5.0836260 |
| H  | 1.6157494  | -6.4687021 | -5.8521717 |
| H  | 3.2286180  | -5.7440677 | -5.6040837 |
| H  | 2.7093769  | -7.1258639 | -4.6046390 |
| C  | 3.7276605  | -4.4477557 | 0.0707611  |
| H  | 2.9971288  | -5.2745478 | 0.1503754  |
| H  | 3.8384283  | -4.0506021 | 1.0959668  |
| C  | 5.0964874  | -4.9824752 | -0.3690275 |
| H  | 5.8527446  | -4.1752467 | -0.3695763 |
| H  | 5.4510062  | -5.7652727 | 0.3267233  |
| H  | 5.0766129  | -5.4214707 | -1.3821364 |
| Am | -1.6792530 | 1.1586417  | 1.0240392  |

[Eu-(DADA)<sub>2</sub>NO<sub>3</sub>](NO<sub>3</sub>)<sub>2</sub>

|   |            |            |            |
|---|------------|------------|------------|
| C | -2.2177453 | -1.2412903 | -2.0087873 |
| N | -1.7928504 | -1.4347744 | -0.5786022 |
| C | -0.3919679 | -1.8967372 | -0.5037427 |
| C | 0.5981903  | -0.8078734 | -0.8584357 |
| N | 1.8157992  | -1.1496895 | -1.3361565 |
| C | -2.6405426 | -2.4321357 | 0.1271222  |
| C | -2.7229611 | -2.1982388 | 1.6291374  |
| N | -3.5374096 | -1.0235090 | 2.0257839  |
| C | -3.4698362 | -0.8708886 | 3.4845866  |
| C | -3.4318384 | 0.5772709  | 3.9710814  |
| N | -4.0599862 | 0.9088062  | 5.1308978  |
| C | -5.0231340 | 0.0249763  | 5.8132388  |
| O | 0.2529643  | 0.3878436  | -0.6847341 |
| C | 2.6728165  | -0.0651173 | -1.8773108 |
| C | -4.9531278 | -1.0900762 | 1.5227323  |
| O | -2.7220747 | 1.3842506  | 3.3472533  |
| C | -3.7784422 | 2.2260098  | 5.7347829  |
| H | -2.2464633 | -3.4505934 | -0.0274600 |
| H | -3.6420502 | -2.4183472 | -0.3163669 |
| H | -3.0840444 | -3.1298759 | 2.1024297  |
| H | -1.7092713 | -2.0491555 | 2.0285208  |
| H | -4.8731623 | -1.0116016 | 0.4283896  |
| H | -1.4339183 | -0.6048285 | -2.4518869 |
| H | -4.2326064 | -1.4745148 | 3.9954329  |
| H | -2.5022275 | -1.2755429 | 3.8196290  |
| H | -0.1584059 | -2.2451583 | 0.5186786  |
| H | -0.2416795 | -2.7899127 | -1.1232146 |
| H | -3.7849882 | 2.0892217  | 6.8275578  |
| H | -2.7513727 | 2.4810749  | 5.4473623  |
| H | -5.6191669 | -0.4863439 | 5.0457132  |
| H | -5.7282392 | 0.6798595  | 6.3391243  |

|    |            |            |            |
|----|------------|------------|------------|
| H  | 2.3287689  | 0.1379304  | -2.9064185 |
| H  | 2.4504926  | 0.8377837  | -1.2963183 |
| C  | 2.3449730  | -2.5331583 | -1.2963058 |
| H  | 3.2924675  | -2.4755659 | -0.7429180 |
| H  | 1.6922027  | -3.1428755 | -0.6598143 |
| Eu | -1.5958902 | 1.1086193  | 0.8697948  |
| C  | 0.4840879  | 4.5952665  | -1.6587228 |
| N  | -0.3498972 | 4.3141144  | -0.4547372 |
| C  | -1.7372564 | 4.6837699  | -0.6824118 |
| C  | -2.5080650 | 3.6699738  | -1.5360249 |
| N  | -3.4724842 | 4.1483952  | -2.3740159 |
| C  | 0.1638799  | 4.8525587  | 0.8103124  |
| C  | -0.1437043 | 4.0417530  | 2.0793582  |
| N  | 0.4689873  | 2.6874999  | 2.1599671  |
| C  | 0.3229418  | 2.1582861  | 3.5310323  |
| C  | 0.3451118  | 0.6270186  | 3.5527508  |
| N  | 0.9655169  | -0.0400553 | 4.5463179  |
| C  | 1.8402254  | 0.5950427  | 5.5748551  |
| O  | -2.2954913 | 2.4564701  | -1.3740310 |
| C  | -4.5034399 | 3.2621559  | -2.9486138 |
| C  | 1.9138254  | 2.6904934  | 1.7315954  |
| O  | -0.2551965 | 0.0398467  | 2.6179044  |
| C  | 1.2617494  | -1.4887689 | 4.3518933  |
| H  | -0.2282128 | 5.8729912  | 1.0053482  |
| H  | 1.2481387  | 4.9766182  | 0.7158421  |
| H  | 0.1886588  | 4.6707618  | 2.9290474  |
| H  | -1.2333774 | 3.9431427  | 2.2043463  |
| H  | 1.8819107  | 2.9912145  | 0.6797857  |
| H  | -0.1899565 | 4.4039905  | -2.5110219 |
| H  | 1.0764435  | 2.5885093  | 4.2014712  |
| H  | -0.6682876 | 2.4484121  | 3.9124085  |
| H  | -2.2742691 | 4.6825507  | 0.2799758  |
| H  | -1.8275149 | 5.7108794  | -1.0738457 |
| H  | 2.3502077  | -1.5412826 | 4.1718548  |
| H  | 0.7657455  | -1.8264627 | 3.4361454  |
| H  | 2.7125263  | 1.0352242  | 5.0660548  |
| H  | 2.2416270  | -0.2479368 | 6.1512390  |
| H  | -4.1797542 | 2.2299112  | -2.7778990 |
| H  | -4.5090700 | 3.4164794  | -4.0394022 |
| C  | -3.5978661 | 5.5694640  | -2.7541545 |
| H  | -4.5805302 | 5.6746616  | -3.2297239 |
| H  | -3.6440139 | 6.2022925  | -1.8552327 |
| N  | -4.0623834 | 3.5055896  | 1.7497052  |
| O  | -3.4188218 | 4.4675225  | 2.1946040  |
| O  | -3.4496194 | 2.6451101  | 1.0163888  |
| O  | -5.2633920 | 3.3612608  | 1.9570049  |
| N  | 5.5593783  | 0.8043733  | 3.9005486  |
| O  | 5.9300741  | 0.0003134  | 4.7625035  |

|   |            |            |            |
|---|------------|------------|------------|
| O | 6.0076509  | 0.7546976  | 2.7431298  |
| O | 4.7164681  | 1.6854069  | 4.1939695  |
| N | -0.3650751 | -4.6017049 | 1.6944753  |
| O | -0.5342451 | -4.9949350 | 0.5179520  |
| O | 0.3850685  | -3.6065602 | 1.9070280  |
| O | -0.9415240 | -5.1609083 | 2.6380709  |
| C | -3.5329242 | -0.4726897 | -2.0994814 |
| H | -3.5021739 | 0.4698098  | -1.5389399 |
| H | -3.7418736 | -0.2133727 | -3.1478102 |
| H | -4.3828476 | -1.0755227 | -1.7481544 |
| C | -2.3063128 | -2.5448312 | -2.8374444 |
| H | -3.2422897 | -3.0742884 | -2.5893434 |
| H | -1.4967415 | -3.2302151 | -2.5526159 |
| C | -2.2382229 | -2.3168267 | -4.3506405 |
| H | -2.2788759 | -3.2743189 | -4.8932382 |
| H | -3.0711654 | -1.6965233 | -4.7190978 |
| H | -1.2989236 | -1.8145608 | -4.6380333 |
| C | -5.7746699 | 0.1125760  | 1.9816718  |
| H | -5.2460549 | 1.0616057  | 1.8366548  |
| H | -6.7065580 | 0.1742082  | 1.4026032  |
| H | -6.0709716 | 0.0351894  | 3.0394861  |
| C | -5.6702341 | -2.4279658 | 1.8329183  |
| H | -5.0680643 | -3.2696651 | 1.4576229  |
| H | -5.7352597 | -2.5734086 | 2.9262649  |
| C | -7.0743884 | -2.5454497 | 1.2325345  |
| H | -7.0652516 | -2.3512202 | 0.1463462  |
| H | -7.4749433 | -3.5612033 | 1.3792007  |
| H | -7.7885554 | -1.8426436 | 1.6888772  |
| C | 0.9466585  | 6.0675180  | -1.7692806 |
| H | 1.6621480  | 6.2885504  | -0.9596564 |
| H | 0.0823232  | 6.7315337  | -1.5920923 |
| C | 1.5914531  | 6.4332040  | -3.1094879 |
| H | 0.9362008  | 6.1795800  | -3.9596832 |
| H | 1.8001848  | 7.5137315  | -3.1639290 |
| H | 2.5483153  | 5.9099874  | -3.2625501 |
| C | 1.6414494  | 3.6072565  | -1.8167100 |
| H | 2.0567548  | 3.6577477  | -2.8354623 |
| H | 2.4701942  | 3.8191671  | -1.1223386 |
| H | 1.2819717  | 2.5850796  | -1.6394794 |
| C | 2.8018492  | 3.7083786  | 2.4925490  |
| H | 2.9768307  | 3.3646433  | 3.5241191  |
| H | 2.2835603  | 4.6766407  | 2.5700356  |
| C | 4.1689854  | 3.9383103  | 1.8378606  |
| H | 4.8217936  | 3.0613998  | 1.9472746  |
| H | 4.0741776  | 4.1786700  | 0.7641681  |
| H | 4.6851449  | 4.7846504  | 2.3184401  |
| C | 2.5349520  | 1.2986292  | 1.7629864  |
| H | 3.5416925  | 1.3469446  | 1.3372384  |

|   |            |            |            |
|---|------------|------------|------------|
| H | 2.6765483  | 0.9242624  | 2.7838080  |
| H | 1.9439573  | 0.5781830  | 1.1878253  |
| C | -5.9299547 | 3.5089094  | -2.3527870 |
| H | -5.8821177 | 4.4666003  | -1.8055501 |
| C | -6.3099893 | 2.4439008  | -1.2965036 |
| H | -5.4731064 | 2.3582956  | -0.5870310 |
| H | -7.1501564 | 2.8343721  | -0.6953998 |
| C | -6.6852030 | 1.0436778  | -1.8301271 |
| H | -6.1507545 | 0.8372089  | -2.7756833 |
| H | -6.3129440 | 0.2869788  | -1.1198557 |
| C | -7.0267216 | 3.6689140  | -3.4286814 |
| H | -7.0062406 | 2.8022891  | -4.1144027 |
| H | -8.0019905 | 3.6200077  | -2.9175053 |
| C | -8.1850273 | 0.7798836  | -2.0349585 |
| H | -8.6161280 | 1.5231274  | -2.7252821 |
| H | -8.7055861 | 0.9309027  | -1.0715103 |
| C | -8.4817105 | -0.6243203 | -2.5638524 |
| H | -8.1051728 | -1.4016714 | -1.8774789 |
| H | -9.5637591 | -0.7910172 | -2.6898622 |
| H | -8.0041234 | -0.7939979 | -3.5443359 |
| C | -6.9935319 | 4.9622544  | -4.2443585 |
| H | -7.0515669 | 5.8501180  | -3.5922822 |
| H | -6.0825836 | 5.0554150  | -4.8552445 |
| H | -7.8473389 | 5.0096145  | -4.9392392 |
| C | -2.5164521 | 6.1379295  | -3.7066424 |
| H | -1.5678000 | 6.1391356  | -3.1463476 |
| C | -2.8572002 | 7.6139650  | -3.9968398 |
| H | -3.8221249 | 7.6747381  | -4.5330330 |
| H | -3.0267045 | 8.1260887  | -3.0314491 |
| C | -1.7940472 | 8.3933913  | -4.7790211 |
| H | -1.6695282 | 7.9577219  | -5.7865871 |
| H | -0.8136853 | 8.2800978  | -4.2798146 |
| C | -2.1162518 | 9.8854936  | -4.9198888 |
| H | -3.1127501 | 9.9999995  | -5.3852481 |
| H | -2.2035348 | 10.3336763 | -3.9129831 |
| C | -1.0798026 | 10.6591949 | -5.7364411 |
| H | -1.0144576 | 10.2760178 | -6.7689752 |
| H | -1.3291299 | 11.7308179 | -5.7952724 |
| H | -0.0738002 | 10.5761926 | -5.2909612 |
| C | -2.2513127 | 5.2865122  | -4.9690804 |
| H | -1.2788704 | 5.5964734  | -5.3883591 |
| H | -2.1070282 | 4.2379714  | -4.6552521 |
| C | -3.2955904 | 5.3435843  | -6.0877192 |
| H | -4.2957378 | 5.0366457  | -5.7456628 |
| H | -3.3925603 | 6.3540888  | -6.5151815 |
| H | -3.0144425 | 4.6672602  | -6.9106270 |
| C | -4.6837951 | 3.4253368  | 5.3711545  |
| H | -4.7023663 | 3.5145107  | 4.2758621  |



|   |            |            |            |
|---|------------|------------|------------|
| C | -4.4618594 | -1.0258217 | 6.8103637  |
| H | -3.4631777 | -1.3259767 | 6.4479115  |
| C | -4.0036189 | 4.7009649  | 5.9198998  |
| H | -2.9153974 | 4.6341462  | 5.7396708  |
| H | -4.1250696 | 4.7389457  | 7.0206966  |
| C | -4.5013554 | 6.0090672  | 5.2944364  |
| H | -4.3467188 | 5.9536373  | 4.2027084  |
| H | -5.5914284 | 6.1140467  | 5.4449028  |
| C | -3.8054043 | 7.2535924  | 5.8558101  |
| H | -2.7131153 | 7.1546154  | 5.7134006  |
| H | -3.9605504 | 7.2994052  | 6.9501257  |
| C | -4.2840906 | 8.5593462  | 5.2182476  |
| H | -3.7634920 | 9.4339649  | 5.6415745  |
| H | -4.1077285 | 8.5596677  | 4.1291964  |
| H | -5.3661113 | 8.7089163  | 5.3747807  |
| C | -6.1472954 | 3.3132785  | 5.8692885  |
| H | -6.5104393 | 4.3253817  | 6.1122485  |
| H | -6.1727515 | 2.7691069  | 6.8324420  |
| C | -7.1370540 | 2.6993203  | 4.8742097  |
| H | -8.1577613 | 2.6788774  | 5.2910458  |
| H | -7.1569836 | 3.2825051  | 3.9409520  |
| H | -6.8729626 | 1.6684972  | 4.5944115  |
| C | -4.2883747 | -0.4315100 | 8.2252824  |
| H | -3.6110646 | 0.4376283  | 8.1613281  |
| H | -5.2573352 | -0.0229636 | 8.5670922  |
| C | -3.7462500 | -1.3893172 | 9.2914868  |
| H | -4.4337185 | -2.2435463 | 9.4183847  |
| H | -2.7900681 | -1.8233708 | 8.9455275  |
| C | -3.5393047 | -0.7233442 | 10.6571306 |
| H | -4.4983810 | -0.2905427 | 10.9969695 |
| H | -2.8484768 | 0.1326256  | 10.5474459 |
| C | -3.0021078 | -1.6774020 | 11.7251921 |
| H | -2.0202976 | -2.0895916 | 11.4373664 |
| H | -2.8779540 | -1.1702991 | 12.6956671 |
| H | -3.6839229 | -2.5305978 | 11.8807520 |
| C | -5.3367827 | -2.3023437 | 6.7886113  |
| H | -5.3507356 | -2.6936265 | 5.7550543  |
| H | -4.8374284 | -3.0845101 | 7.3831050  |
| C | -6.7794038 | -2.1415427 | 7.2807470  |
| H | -6.8242526 | -1.8237431 | 8.3348311  |
| H | -7.3443696 | -1.4015364 | 6.6893045  |
| H | -7.3221996 | -3.0972204 | 7.2057828  |
| C | 1.2664404  | 1.6166480  | 6.5895005  |
| H | 1.1691992  | 2.5894953  | 6.0801200  |
| C | -0.1378334 | 1.2886226  | 7.1463782  |
| H | -0.5633078 | 2.2283582  | 7.5410512  |
| H | -0.7959107 | 0.9937819  | 6.3112401  |
| C | -0.2176024 | 0.2274175  | 8.2472675  |

|   |            |            |            |
|---|------------|------------|------------|
| H | -1.2660053 | 0.0441661  | 8.5261055  |
| H | 0.2075633  | -0.7373687 | 7.9317726  |
| H | 0.3117735  | 0.5397459  | 9.1601581  |
| C | 2.2926819  | 1.8321090  | 7.7253016  |
| H | 1.8332945  | 2.5084327  | 8.4703922  |
| H | 2.4534639  | 0.8743316  | 8.2529072  |
| C | 3.6563766  | 2.3996852  | 7.3155583  |
| H | 4.1583423  | 1.7322207  | 6.5979062  |
| H | 3.5143109  | 3.3559620  | 6.7764661  |
| C | 4.5897156  | 2.6259609  | 8.5102995  |
| H | 4.6889568  | 1.6780853  | 9.0715997  |
| H | 4.1269707  | 3.3430593  | 9.2149367  |
| C | 5.9799294  | 3.1208137  | 8.1063931  |
| H | 5.9244397  | 4.0887619  | 7.5796777  |
| H | 6.6325129  | 3.2560930  | 8.9844829  |
| H | 6.4717185  | 2.4059431  | 7.4261876  |
| C | 0.8931681  | -2.4113584 | 5.5348246  |
| H | 0.9838599  | -1.8174852 | 6.4599558  |
| C | 1.9163812  | -3.5596313 | 5.7012781  |
| H | 1.6892599  | -4.0868702 | 6.6449444  |
| H | 2.9133717  | -3.1058283 | 5.8580382  |
| C | 2.0055241  | -4.5871708 | 4.5683246  |
| H | 1.0120094  | -5.0225113 | 4.3689474  |
| H | 2.2846201  | -4.0880251 | 3.6249737  |
| C | 3.0026319  | -5.7127983 | 4.8623513  |
| H | 2.7136531  | -6.2210393 | 5.8020544  |
| H | 4.0030730  | -5.2809776 | 5.0539645  |
| C | 3.0974162  | -6.7443758 | 3.7364360  |
| H | 3.8066512  | -7.5519788 | 3.9822087  |
| H | 2.1160106  | -7.2057470 | 3.5350170  |
| H | 3.4358331  | -6.2785033 | 2.7953717  |
| C | -0.5732385 | -2.8738141 | 5.4380198  |
| H | -0.7225888 | -3.4229975 | 4.4934947  |
| H | -1.2000733 | -1.9644458 | 5.3801114  |
| C | -1.0581416 | -3.7322722 | 6.6076189  |
| H | -0.8771768 | -3.2436993 | 7.5813530  |
| H | -2.1398405 | -3.9299335 | 6.5303797  |
| H | -0.5555094 | -4.7115936 | 6.6294184  |
| C | 4.1999050  | -0.2781186 | -1.8913198 |
| H | 4.4310123  | -1.2552232 | -2.3452454 |
| C | 4.8243265  | -0.2394456 | -0.4815856 |
| H | 4.1654808  | -0.7545590 | 0.2364758  |
| H | 4.8586748  | 0.8095544  | -0.1437343 |
| C | 6.2260208  | -0.8418402 | -0.3731462 |
| H | 6.6029713  | -0.7285706 | 0.6545136  |
| H | 6.2256538  | -1.9169778 | -0.6217975 |
| H | 6.9446252  | -0.3478576 | -1.0483753 |
| C | 4.8260485  | 0.8002588  | -2.8086275 |

|   |            |            |            |
|---|------------|------------|------------|
| H | 5.8808490  | 0.9403363  | -2.5204841 |
| H | 4.3364953  | 1.7719809  | -2.6072220 |
| C | 4.7748078  | 0.4969092  | -4.3105498 |
| H | 5.3675717  | -0.4150669 | -4.5116925 |
| H | 3.7414225  | 0.2541018  | -4.6210556 |
| C | 5.2976253  | 1.6421577  | -5.1846529 |
| H | 4.6652039  | 2.5353820  | -5.0262749 |
| H | 6.3084068  | 1.9284235  | -4.8404977 |
| C | 5.3432946  | 1.3051145  | -6.6759198 |
| H | 5.6981900  | 2.1600598  | -7.2740789 |
| H | 6.0212209  | 0.4576465  | -6.8741165 |
| H | 4.3462963  | 1.0237612  | -7.0562227 |
| C | 2.6097659  | -3.2201519 | -2.6651767 |
| H | 2.8222681  | -2.4202486 | -3.3971476 |
| C | 1.4002112  | -4.0091713 | -3.2159912 |
| H | 0.5241749  | -3.3380071 | -3.2396063 |
| H | 1.5966176  | -4.2508883 | -4.2758497 |
| C | 1.0441739  | -5.2988910 | -2.4644047 |
| H | 1.9168989  | -5.9756432 | -2.4572126 |
| H | 0.8181854  | -5.0841176 | -1.4061167 |
| C | -0.1442822 | -6.0599067 | -3.0642865 |
| H | 0.0818232  | -6.3339829 | -4.1123864 |
| H | -1.0221195 | -5.3901291 | -3.1134823 |
| C | -0.5127888 | -7.3099739 | -2.2621454 |
| H | -1.3718187 | -7.8382302 | -2.7075659 |
| H | 0.3301820  | -8.0215673 | -2.2238568 |
| H | -0.7703693 | -7.0435808 | -1.2243220 |
| C | 3.8884107  | -4.0822360 | -2.5638067 |
| H | 3.7549403  | -4.8461928 | -1.7781911 |
| H | 4.7121462  | -3.4391821 | -2.2081991 |
| C | 4.3226423  | -4.7546830 | -3.8674748 |
| H | 4.4470797  | -4.0158994 | -4.6779839 |
| H | 5.2883462  | -5.2695617 | -3.7386280 |
| H | 3.5958935  | -5.5065454 | -4.2131186 |

[Am-(me-PIPDA)<sub>2</sub>NO<sub>3</sub>](NO<sub>3</sub>)<sub>2</sub>

|   |            |            |            |
|---|------------|------------|------------|
| C | 0.3885172  | 0.0305719  | 11.3614147 |
| H | 1.4629892  | 0.2717867  | 11.2932623 |
| H | -0.0179688 | -0.0455501 | 10.3333268 |
| C | -0.0294327 | -4.3891800 | 14.5411129 |
| H | -0.8829247 | -5.0454582 | 14.2983015 |
| C | -0.2805448 | 1.1730755  | 12.1252940 |
| O | -0.6860162 | 0.9933833  | 13.2855378 |
| N | -0.3964832 | 2.3671392  | 11.5008808 |
| C | -1.0648543 | 3.4794214  | 12.1627420 |
| C | 0.0586278  | 2.6148920  | 10.1378041 |
| C | -0.1401213 | -3.8978596 | 15.9773093 |
| O | 0.0565634  | -2.6809026 | 16.2361772 |

|   |            |            |            |
|---|------------|------------|------------|
| N | -0.3636606 | -4.7866690 | 16.9404244 |
| C | -0.3019293 | -4.3419414 | 18.3382312 |
| C | -0.7292329 | -6.1715997 | 16.6346365 |
| H | -2.0052006 | 3.7355204  | 11.6432280 |
| H | -1.2923310 | 3.1994063  | 13.1961397 |
| H | 0.4081454  | 3.6554397  | 10.0635688 |
| H | 0.9024251  | 1.9684438  | 9.8696601  |
| H | -1.4789031 | -6.2061168 | 15.8301118 |
| H | 0.1534668  | -6.7742105 | 16.3565675 |
| H | -1.0572044 | -3.5624160 | 18.5258560 |
| H | 0.6982678  | -3.9545772 | 18.5857198 |
| C | -1.9744271 | 1.1306849  | 16.3577554 |
| C | 3.2471994  | -0.3895088 | 16.9169453 |
| H | 3.9146038  | 0.4210050  | 16.5850814 |
| H | 3.5384524  | -0.6849216 | 17.9396767 |
| C | -2.6831807 | -0.0638176 | 15.7010870 |
| O | -1.9856209 | -0.8718078 | 15.0598981 |
| N | -4.0122573 | -0.2026334 | 15.7936655 |
| C | -4.6520729 | -1.3894282 | 15.2022515 |
| C | -4.9031680 | 0.7753485  | 16.4043307 |
| C | 3.4845152  | -1.5370177 | 15.9485052 |
| O | 2.6478041  | -1.7897750 | 15.0383952 |
| N | 4.6376069  | -2.2039282 | 16.0054406 |
| C | 5.5977119  | -2.0336876 | 17.1000487 |
| C | 4.8999165  | -3.2100626 | 14.9808868 |
| H | -4.8593564 | -1.2331962 | 14.1305157 |
| H | -4.0232000 | -2.2860524 | 15.3141141 |
| H | -5.2888055 | 0.4159279  | 17.3741268 |
| H | -4.4120540 | 1.7434828  | 16.5560245 |
| H | 4.2750024  | -4.1054359 | 15.1385830 |
| H | 4.6861689  | -2.8048846 | 13.9814688 |
| H | 6.2228444  | -2.9344559 | 17.1552463 |
| H | 5.0750422  | -1.9319260 | 18.0629235 |
| H | 0.8844720  | -5.0036327 | 14.4802635 |
| N | 3.2596005  | 0.7469095  | 13.4151129 |
| O | 3.5220791  | 0.3192226  | 12.2854585 |
| O | 2.0161609  | 0.7856600  | 13.7799767 |
| O | 4.1168863  | 1.1536502  | 14.1920365 |
| N | -3.4738146 | -4.7726741 | 14.4004599 |
| O | -4.5133933 | -4.3895253 | 13.8505698 |
| O | -2.9977418 | -4.1299877 | 15.3832000 |
| O | -2.8536953 | -5.7826195 | 13.9796926 |
| N | 2.8701572  | -2.6239374 | 19.5328301 |
| O | 2.1016310  | -3.0177391 | 20.4159750 |
| O | 3.7039111  | -1.7071726 | 19.7682247 |
| O | 2.8126831  | -3.1147699 | 18.3678361 |
| C | -0.4070103 | 0.0481007  | 17.8819420 |
| C | 1.0628748  | -0.4089463 | 18.0331483 |

|    |            |            |            |
|----|------------|------------|------------|
| N  | 1.8528774  | 0.0929117  | 16.8854678 |
| C  | 1.7709866  | 1.5633597  | 16.8604151 |
| C  | 0.2989310  | 1.9943731  | 16.6332560 |
| N  | -0.5747855 | 0.8068421  | 16.6225505 |
| H  | -0.7208334 | 0.6782457  | 18.7389181 |
| H  | 1.4964125  | -0.0444740 | 18.9819469 |
| H  | 2.1535102  | 1.9850018  | 17.8106828 |
| H  | -0.0250318 | 2.7072375  | 17.4182836 |
| C  | 1.1648941  | -3.4574415 | 12.6153468 |
| C  | 1.2928031  | -2.2041262 | 11.7123553 |
| N  | 0.2508559  | -1.2293918 | 12.0808690 |
| C  | -1.0788854 | -1.8464686 | 11.9126249 |
| C  | -1.2089240 | -3.0727352 | 12.8457594 |
| N  | 0.0635042  | -3.2749190 | 13.5775899 |
| H  | 0.9942873  | -4.3632778 | 12.0010866 |
| H  | 2.2703709  | -1.7196810 | 11.8447530 |
| H  | -1.8467043 | -1.1012695 | 12.1601481 |
| H  | -1.9980854 | -2.9088810 | 13.5877246 |
| H  | 2.0936416  | -3.6023020 | 13.1833295 |
| H  | -1.4741420 | -3.9820597 | 12.2763693 |
| H  | -1.2233784 | -2.1360956 | 10.8514428 |
| H  | 1.1970226  | -2.4830299 | 10.6433976 |
| H  | 2.4014900  | 1.9293070  | 16.0407146 |
| H  | 0.1958795  | 2.4982789  | 15.6605185 |
| H  | 1.1253055  | -1.5020175 | 18.0366268 |
| H  | -1.0703323 | -0.8279486 | 17.8505797 |
| H  | -2.0136178 | 1.9614892  | 15.6335132 |
| H  | -2.4864272 | 1.4693897  | 17.2766194 |
| Am | 0.4630271  | -0.8625058 | 14.7535122 |
| H  | -0.4137631 | 4.3687255  | 12.1611712 |
| H  | -0.7514504 | 2.4731328  | 9.3995788  |
| H  | 6.2542228  | -1.1643810 | 16.9227288 |
| H  | 5.9565705  | -3.5010415 | 15.0293391 |
| H  | -1.1730921 | -6.6177521 | 17.5329972 |
| H  | -0.5167265 | -5.1999507 | 18.9860081 |
| H  | -5.7648712 | 0.9419685  | 15.7388095 |
| H  | -5.6053722 | -1.5620558 | 15.7207677 |

[Eu-(me-PIPDA)<sub>2</sub>NO<sub>3</sub>](NO<sub>3</sub>)<sub>2</sub>

|   |            |            |            |
|---|------------|------------|------------|
| C | 0.3417881  | 0.0578577  | 11.3866816 |
| H | 1.4133793  | 0.3028992  | 11.2910005 |
| H | -0.0915970 | -0.0141629 | 10.3695162 |
| C | 0.0407998  | -4.3484628 | 14.5741273 |
| H | -0.7587449 | -5.0646477 | 14.3165163 |

|   |            |            |            |
|---|------------|------------|------------|
| C | -0.3070518 | 1.1955752  | 12.1738650 |
| O | -0.6665928 | 1.0145394  | 13.3480984 |
| N | -0.4552088 | 2.3885096  | 11.5529506 |
| C | -1.1068990 | 3.4975330  | 12.2355927 |
| C | -0.0212581 | 2.6524579  | 10.1861264 |
| C | -0.1497367 | -3.8350625 | 15.9946037 |
| O | -0.0238650 | -2.6057899 | 16.2304652 |
| N | -0.3692683 | -4.7167199 | 16.9650954 |
| C | -0.4266780 | -4.2447942 | 18.3528438 |
| C | -0.6166981 | -6.1288404 | 16.6640528 |
| H | -1.9838492 | 3.8400839  | 11.6597203 |
| H | -1.4342032 | 3.1677191  | 13.2265458 |
| H | 0.3443445  | 3.6885541  | 10.1224962 |
| H | 0.8062721  | 1.9975258  | 9.8900129  |
| H | -1.4154824 | -6.2261048 | 15.9123095 |
| H | 0.2976518  | -6.6343286 | 16.3085869 |
| H | -1.0835554 | -3.3658527 | 18.4210110 |
| H | 0.5752613  | -3.9783081 | 18.7250329 |
| C | -1.9453729 | 1.1299461  | 16.3124839 |
| C | 3.2578240  | -0.4152140 | 16.8805222 |
| H | 3.9303610  | 0.3733362  | 16.5088251 |
| H | 3.5587418  | -0.6810806 | 17.9085497 |
| C | -2.6482313 | -0.0753339 | 15.6680527 |
| O | -1.9473719 | -0.8826667 | 15.0348396 |
| N | -3.9778108 | -0.2254835 | 15.7610707 |
| C | -4.5990920 | -1.4181607 | 15.1617220 |
| C | -4.8844980 | 0.7443607  | 16.3585572 |
| C | 3.4583401  | -1.6014574 | 15.9516729 |
| O | 2.5983382  | -1.8750414 | 15.0717678 |
| N | 4.6035532  | -2.2823420 | 16.0146378 |
| C | 5.5843469  | -2.0655250 | 17.0833261 |
| C | 4.8135010  | -3.3607619 | 15.0542806 |
| H | -4.7466459 | -1.2856243 | 14.0771190 |
| H | -3.9861167 | -2.3186351 | 15.3206912 |
| H | -5.3334441 | 0.3492593  | 17.2861536 |
| H | -4.3828407 | 1.6913979  | 16.5877763 |
| H | 4.1661756  | -4.2236007 | 15.2852030 |
| H | 4.5884001  | -3.0164995 | 14.0345689 |
| H | 6.2725677  | -2.9200007 | 17.1015175 |
| H | 5.0831930  | -2.0090555 | 18.0618456 |
| H | 0.9965668  | -4.8981940 | 14.5577427 |
| N | 3.2678485  | 0.7276410  | 13.3748660 |
| O | 3.5086804  | 0.3779735  | 12.2149860 |
| O | 2.0344738  | 0.7130749  | 13.7731567 |
| O | 4.1357674  | 1.1088900  | 14.1531669 |
| N | -3.3829634 | -4.8172619 | 14.3647466 |
| O | -4.3479051 | -4.3861116 | 13.7193627 |
| O | -2.9882068 | -4.2098131 | 15.4021622 |

|    |            |            |            |
|----|------------|------------|------------|
| O  | -2.7577815 | -5.8386225 | 13.9848695 |
| N  | 2.8435041  | -2.6503123 | 19.5261786 |
| O  | 2.0771705  | -3.0286705 | 20.4187571 |
| O  | 3.6897801  | -1.7438004 | 19.7512298 |
| O  | 2.7693708  | -3.1474160 | 18.3668104 |
| C  | -0.3837158 | 0.0698737  | 17.8543099 |
| C  | 1.0798106  | -0.4022314 | 18.0045733 |
| N  | 1.8701926  | 0.0836952  | 16.8505098 |
| C  | 1.8011930  | 1.5544573  | 16.8120341 |
| C  | 0.3326308  | 1.9920352  | 16.5746766 |
| N  | -0.5461052 | 0.8088510  | 16.5837445 |
| H  | -0.6865766 | 0.7173871  | 18.7021651 |
| H  | 1.5225608  | -0.0363050 | 18.9486320 |
| H  | 2.1843719  | 1.9814865  | 17.7595238 |
| H  | 0.0126219  | 2.7216514  | 17.3457329 |
| C  | 1.1692361  | -3.4299225 | 12.6032710 |
| C  | 1.2671457  | -2.1701985 | 11.7053619 |
| N  | 0.2273295  | -1.2047971 | 12.1042289 |
| C  | -1.1025489 | -1.8289716 | 11.9686904 |
| C  | -1.1954267 | -3.0599768 | 12.8994464 |
| N  | 0.0983849  | -3.2469675 | 13.5967443 |
| H  | 0.9795968  | -4.3323256 | 11.9895866 |
| H  | 2.2440149  | -1.6789115 | 11.8173048 |
| H  | -1.8665755 | -1.0902060 | 12.2452196 |
| H  | -1.9680399 | -2.9054025 | 13.6594942 |
| H  | 2.1139644  | -3.5781998 | 13.1430721 |
| H  | -1.4634254 | -3.9716072 | 12.3353419 |
| H  | -1.2771106 | -2.1136110 | 10.9108132 |
| H  | 1.1494304  | -2.4429146 | 10.6370773 |
| H  | 2.4371929  | 1.9066673  | 15.9906978 |
| H  | 0.2344459  | 2.4759419  | 15.5915114 |
| H  | 1.1305654  | -1.4958414 | 18.0142694 |
| H  | -1.0561359 | -0.7989038 | 17.8374659 |
| H  | -1.9828689 | 1.9496543  | 15.5764981 |
| H  | -2.4575555 | 1.4804859  | 17.2266209 |
| H  | -0.4112238 | 4.3464036  | 12.3469899 |
| H  | -0.8481238 | 2.5365394  | 9.4622705  |
| H  | 6.1739677  | -1.1506395 | 16.9027089 |
| H  | 5.8619376  | -3.6803942 | 15.0982082 |
| H  | -0.9377348 | -6.6283928 | 17.5858278 |
| H  | -0.8468114 | -5.0430665 | 18.9765781 |
| H  | -5.7029297 | 0.9633079  | 15.6535157 |
| H  | -5.5803885 | -1.5693261 | 15.6321236 |
| Eu | 0.4935608  | -0.8531952 | 14.7514969 |

[Am-(me-DADA)<sub>2</sub>NO<sub>3</sub>](NO<sub>3</sub>)<sub>2</sub>

|    |            |            |            |
|----|------------|------------|------------|
| H  | -1.6562327 | -1.6903729 | -2.9273915 |
| C  | -1.6173792 | -0.6958277 | -2.4407811 |
| N  | -1.7707968 | -0.8189298 | -0.9790104 |
| C  | -0.6441369 | -1.5928240 | -0.4045849 |
| C  | 0.6331311  | -0.7791870 | -0.5901058 |
| N  | 1.8139763  | -1.3780491 | -0.6638212 |
| C  | -3.0871177 | -1.4386740 | -0.7198353 |
| C  | -3.4878626 | -1.4830629 | 0.7412273  |
| N  | -3.4651835 | -0.1584769 | 1.4009976  |
| C  | -3.3534171 | -0.3490018 | 2.8539284  |
| C  | -2.8476617 | 0.9099676  | 3.5357463  |
| N  | -3.0972577 | 1.0901773  | 4.8494909  |
| C  | -3.7043958 | 0.0775239  | 5.7055538  |
| O  | 0.5053196  | 0.4769253  | -0.7118580 |
| C  | 3.0097602  | -0.6352490 | -1.0686506 |
| C  | -4.6809714 | 0.6119310  | 1.0795649  |
| O  | -2.1960127 | 1.7421856  | 2.8819108  |
| C  | -2.7178145 | 2.3458584  | 5.4865340  |
| H  | -3.1086222 | -2.4785910 | -1.1043260 |
| H  | -3.8202359 | -0.8687902 | -1.3128366 |
| H  | -4.4993599 | -1.9323345 | 0.8071062  |
| H  | -2.8210300 | -2.1586498 | 1.2891901  |
| H  | -5.5895830 | 0.0572421  | 1.3910552  |
| H  | -4.6629391 | 1.5903997  | 1.5758133  |
| H  | -4.7404334 | 0.7860196  | -0.0041187 |
| H  | -0.6637526 | -0.2166993 | -2.6912590 |
| H  | -2.4257570 | -0.0715625 | -2.8421090 |
| H  | -4.3256374 | -0.6649152 | 3.2769089  |
| H  | -2.6282351 | -1.1662604 | 3.0439497  |
| H  | -0.8035104 | -1.7772854 | 0.6791025  |
| H  | -0.5627107 | -2.5903411 | -0.8723864 |
| H  | -3.4772786 | 2.6136531  | 6.2365676  |
| H  | -1.7388146 | 2.2638422  | 5.9916804  |
| H  | -2.6735130 | 3.1394790  | 4.7316920  |
| H  | -4.7868209 | 0.2501788  | 5.8441989  |
| H  | -3.5493923 | -0.9317646 | 5.3067778  |
| H  | -3.2232298 | 0.1130551  | 6.6948720  |
| H  | 2.7115445  | 0.2987839  | -1.5574572 |
| H  | 3.5678935  | -1.2604166 | -1.7844144 |
| H  | 3.6608676  | -0.4055846 | -0.2061508 |
| C  | 2.0600000  | -2.7526843 | -0.2190375 |
| H  | 2.3669414  | -3.3840074 | -1.0701372 |
| H  | 2.8780622  | -2.7105588 | 0.5180164  |
| H  | 1.1855034  | -3.1896018 | 0.2801660  |
| Am | -1.3346472 | 1.4781310  | 0.4825065  |
| H  | 0.5635111  | 4.1693549  | -2.9481219 |
| C  | 0.2614983  | 3.3211954  | -2.3001563 |
| N  | -0.4687516 | 3.7821572  | -1.1074581 |



|   |            |            |            |
|---|------------|------------|------------|
| C | -1.7308759 | 4.4037980  | -1.5049760 |
| C | -2.7974261 | 3.3589463  | -1.8131722 |
| N | -3.9806128 | 3.7966888  | -2.2825612 |
| C | 0.3541664  | 4.7005627  | -0.2767599 |
| C | 0.3174712  | 4.3841347  | 1.2204557  |
| N | 0.7186835  | 2.9924391  | 1.4924245  |
| C | 0.7138018  | 2.6666883  | 2.9281849  |
| C | 0.5800530  | 1.1448668  | 3.0947361  |
| N | 0.9334477  | 0.5545778  | 4.2316101  |
| C | 1.5908991  | 1.2620971  | 5.3272294  |
| O | -2.5660375 | 2.1468774  | -1.6209123 |
| C | -5.0734949 | 2.8539850  | -2.4983031 |
| C | 2.0711872  | 2.7140307  | 0.9525445  |
| O | 0.0907026  | 0.4996112  | 2.1297117  |
| C | 1.0300048  | -0.9126563 | 4.2936012  |
| H | 0.0346512  | 5.7484651  | -0.4163182 |
| H | 1.3915107  | 4.6538253  | -0.6349510 |
| H | 0.9951384  | 5.1010038  | 1.7310011  |
| H | -0.6958297 | 4.5583213  | 1.6133389  |
| H | 2.7582459  | 3.5496942  | 1.1861462  |
| H | 2.5037056  | 1.8246552  | 1.4170768  |
| H | 2.0460908  | 2.5523399  | -0.1293215 |
| H | -0.3764304 | 2.6452210  | -2.8846430 |
| H | 1.1552912  | 2.7567038  | -2.0075236 |
| H | 1.6305733  | 3.0360499  | 3.4165027  |
| H | -0.1574693 | 3.1387437  | 3.4077776  |
| H | -2.1147811 | 5.0185068  | -0.6772784 |
| H | -1.5886176 | 5.0717010  | -2.3803013 |
| H | 2.0558719  | -1.1996172 | 4.0044800  |
| H | 0.8196276  | -1.2324535 | 5.3247871  |
| H | 0.3140758  | -1.3894281 | 3.6121694  |
| H | 2.6823475  | 1.2069882  | 5.1911966  |
| H | 1.2702057  | 2.3097684  | 5.3827444  |
| H | 1.3092687  | 0.7750299  | 6.2724752  |
| H | -4.6695417 | 1.8374625  | -2.5472059 |
| H | -5.5862157 | 3.0883922  | -3.4439549 |
| H | -5.8071341 | 2.9068216  | -1.6751115 |
| C | -4.3038499 | 5.2221319  | -2.3509025 |
| H | -5.2761398 | 5.3378712  | -2.8465546 |
| H | -4.3672586 | 5.6726110  | -1.3462385 |
| H | -3.5602405 | 5.7787573  | -2.9397808 |
| N | -3.4394624 | 4.1566216  | 1.6005071  |
| O | -3.0435795 | 5.3230671  | 1.4810949  |
| O | -2.9409080 | 3.2727523  | 0.7971338  |
| O | -4.2940399 | 3.8154588  | 2.4090183  |
| N | 4.0303022  | 0.0867903  | 2.3183472  |
| O | 3.6401759  | 0.8832726  | 3.2116477  |
| O | 3.8255386  | -1.1389821 | 2.4327553  |

O 4.5995476 0.5473028 1.3023117  
N -1.1982502 -3.8349405 2.2868103  
O -0.2203794 -4.3465646 1.5609505  
O -1.1738896 -2.5772786 2.5845034  
O -2.2842651 -4.3419317 1.7292053

[Eu-(me-DADA)<sub>2</sub>NO<sub>3</sub>](NO<sub>3</sub>)<sub>2</sub>

H -1.9868453 -1.8324122 -2.7506922  
C -1.9441085 -0.8286152 -2.2842973  
N -1.7926377 -0.9331743 -0.8214300  
C -0.5139934 -1.5983082 -0.4976523  
C 0.6562368 -0.6694347 -0.7847229  
N 1.8868754 -1.1744583 -0.8701944  
C -2.9424348 -1.6943397 -0.2755989  
C -3.1061996 -1.5641075 1.2290227  
N -3.2834992 -0.1645472 1.6782071  
C -3.1291246 -0.1046563 3.1356328  
C -2.7898151 1.3092923 3.6019272  
N -3.2085508 1.7496546 4.8067164  
C -3.9034795 0.9470351 5.8053455  
O 0.4157444 0.5591140 -0.9369082  
C 3.0171847 -0.3230708 -1.2358653  
C -4.6109295 0.3571410 1.3001884  
O -2.0868465 2.0225871 2.8684158  
C -2.9249683 3.1331751 5.1856455  
H -2.8520754 -2.7724888 -0.5052323  
H -3.8425225 -1.3304646 -0.7947973  
H -3.9707686 -2.1866346 1.5340247  
H -2.2394641 -1.9999381 1.7448623  
H -5.4152129 -0.3042693 1.6823476  
H -4.7502267 1.3728065 1.6918856  
H -4.7018963 0.4123936 0.2067499  
H -1.1017552 -0.2715202 -2.7119374  
H -2.8640411 -0.2805562 -2.5254380  
H -4.0280287 -0.5083535 3.6336473  
H -2.2795630 -0.7459261 3.4233490  
H -0.4826875 -1.8581138 0.5722933  
H -0.4161802 -2.5546571 -1.0414863  
H -3.6828542 3.4611548 5.9110074  
H -1.9285866 3.2287517 5.6520830  
H -2.9821134 3.7816856 4.3042606  
H -4.9549846 1.2662952 5.9107155  
H -3.8817761 -0.1194226 5.5595672  
H -3.4091151 1.0694684 6.7830543  
H 2.6485436 0.6037639 -1.6875177

|    |            |            |            |
|----|------------|------------|------------|
| H  | 3.6398835  | -0.8635798 | -1.9671326 |
| H  | 3.6177085  | -0.0960070 | -0.3413414 |
| C  | 2.2578994  | -2.5187563 | -0.4152668 |
| H  | 2.7680531  | -3.0592109 | -1.2295754 |
| H  | 2.9488903  | -2.4025345 | 0.4353684  |
| H  | 1.3970785  | -3.1109416 | -0.0792595 |
| Eu | -1.3881731 | 1.4771961  | 0.4335063  |
| H  | 0.5345153  | 4.3257864  | -2.8396185 |
| C  | 0.2462712  | 3.4354205  | -2.2433986 |
| N  | -0.5073096 | 3.8148060  | -1.0370124 |
| C  | -1.7753510 | 4.4275231  | -1.4303484 |
| C  | -2.7895823 | 3.3685734  | -1.8582771 |
| N  | -3.9656411 | 3.7948290  | -2.3639167 |
| C  | 0.2870494  | 4.6837013  | -0.1299825 |
| C  | 0.3111062  | 4.2144877  | 1.3299865  |
| N  | 0.7374966  | 2.8098542  | 1.4672575  |
| C  | 0.8294569  | 2.3794309  | 2.8734282  |
| C  | 0.5906805  | 0.8643592  | 2.9665329  |
| N  | 0.9896517  | 0.1959843  | 4.0516657  |
| C  | 1.6482811  | 0.8097998  | 5.2065143  |
| O  | -2.5265959 | 2.1584509  | -1.7201434 |
| C  | -5.0272658 | 2.8320830  | -2.6337832 |
| C  | 2.0498483  | 2.5598051  | 0.8342854  |
| O  | -0.0130310 | 0.2969885  | 2.0229496  |
| C  | 0.9239251  | -1.2700199 | 4.0953177  |
| H  | -0.0966708 | 5.7184874  | -0.1438855 |
| H  | 1.3159004  | 4.7401519  | -0.5128944 |
| H  | 0.9877237  | 4.8969760  | 1.8871363  |
| H  | -0.6935944 | 4.3260529  | 1.7717067  |
| H  | 2.8044820  | 3.2798258  | 1.2040641  |
| H  | 2.4113862  | 1.5583435  | 1.0963793  |
| H  | 1.9817461  | 2.6248605  | -0.2541689 |
| H  | -0.3689385 | 2.7752863  | -2.8676756 |
| H  | 1.1480232  | 2.8739387  | -1.9766195 |
| H  | 1.8167090  | 2.6340809  | 3.2919792  |
| H  | 0.0460535  | 2.8789112  | 3.4614526  |
| H  | -2.2148962 | 4.9577926  | -0.5712414 |
| H  | -1.6233564 | 5.1671236  | -2.2437831 |
| H  | 1.9530159  | -1.6579946 | 4.1540709  |
| H  | 0.3601674  | -1.5890092 | 4.9876861  |
| H  | 0.4419100  | -1.6674091 | 3.1973807  |
| H  | 2.7255411  | 0.5812385  | 5.1942270  |
| H  | 1.5052638  | 1.8954611  | 5.2230837  |
| H  | 1.1995729  | 0.3916683  | 6.1221930  |
| H  | -4.6002964 | 1.8247166  | -2.6710122 |
| H  | -5.5055900 | 3.0627582  | -3.5987536 |
| H  | -5.7958412 | 2.8649248  | -1.8413917 |
| C  | -4.3514384 | 5.2036038  | -2.3685568 |

|   |            |            |            |
|---|------------|------------|------------|
| H | -5.1894786 | 5.3383259  | -3.0661824 |
| H | -4.6680404 | 5.5433199  | -1.3669794 |
| H | -3.5290311 | 5.8458149  | -2.7095197 |
| N | -3.6816272 | 3.9650327  | 1.5145067  |
| O | -3.2571571 | 5.1258321  | 1.4445022  |
| O | -3.2140641 | 3.0958503  | 0.6884691  |
| O | -4.5416250 | 3.6202166  | 2.3228320  |
| N | 3.8838114  | 0.1060653  | 2.9435571  |
| O | 4.1496019  | -0.6714437 | 3.8773190  |
| O | 3.4775988  | -0.3500000 | 1.8423033  |
| O | 3.9878938  | 1.3422154  | 3.1004309  |
| N | -1.0166272 | -4.2538697 | 1.1924840  |
| O | -0.2250683 | -4.6846141 | 0.3326300  |
| O | -0.6059039 | -3.4453762 | 2.0711687  |
| O | -2.2159311 | -4.5818972 | 1.1724261  |

### Starting coordinates for optimization

[Eu-(PIPDA)<sub>2</sub>NO<sub>3</sub>](NO<sub>3</sub>)<sub>2</sub>

|   |             |             |             |
|---|-------------|-------------|-------------|
| C | 0.34178810  | 0.05785770  | 11.38668160 |
| H | 1.41337930  | 0.30289920  | 11.29100050 |
| H | -0.09159700 | -0.01416290 | 10.36951620 |
| C | 0.04079980  | -4.34846280 | 14.57412730 |
| H | -0.75874490 | -5.06464770 | 14.31651630 |
| C | -0.30705180 | 1.19557520  | 12.17386500 |
| O | -0.66659280 | 1.01453940  | 13.34809840 |
| N | -0.45520880 | 2.38850960  | 11.55295060 |
| C | -1.10689900 | 3.49753300  | 12.23559270 |
| C | -0.02125810 | 2.65245790  | 10.18612640 |
| C | -0.14973670 | -3.83506250 | 15.99460370 |
| O | -0.02386500 | -2.60578990 | 16.23046520 |
| N | -0.36926830 | -4.71671990 | 16.96509540 |
| C | -0.42667800 | -4.24479420 | 18.35284380 |
| C | -0.61669810 | -6.12884040 | 16.66405280 |
| H | -1.98384920 | 3.84008390  | 11.65972030 |
| H | -1.43420320 | 3.16771910  | 13.22654580 |
| H | 0.34434450  | 3.68855410  | 10.12249620 |
| H | 0.80627210  | 1.99752580  | 9.89001290  |
| H | -1.41548240 | -6.22610480 | 15.91230950 |
| H | -1.08355540 | -3.36585270 | 18.42101100 |
| H | 0.57526130  | -3.97830810 | 18.72503290 |
| C | -1.94537290 | 1.12994610  | 16.31248390 |
| C | 3.25782400  | -0.41521400 | 16.88052220 |
| H | 3.93036100  | 0.37333620  | 16.50882510 |
| H | 3.55874180  | -0.68108060 | 17.90854970 |

|   |             |             |             |
|---|-------------|-------------|-------------|
| C | -2.64823130 | -0.07533390 | 15.66805270 |
| O | -1.94737190 | -0.88266670 | 15.03483960 |
| N | -3.97781080 | -0.22548350 | 15.76107070 |
| C | -4.59909200 | -1.41816070 | 15.16172200 |
| C | -4.88449800 | 0.74436070  | 16.35855720 |
| C | 3.45834010  | -1.60145740 | 15.95167290 |
| O | 2.59833820  | -1.87504140 | 15.07176780 |
| N | 4.60355320  | -2.28234200 | 16.01463780 |
| C | 5.58434690  | -2.06552500 | 17.08332610 |
| C | 4.81350100  | -3.36076190 | 15.05428060 |
| H | -3.98611670 | -2.31863510 | 15.32069120 |
| H | -4.38284070 | 1.69139790  | 16.58777630 |
| H | 4.16617560  | -4.22360070 | 15.28520300 |
| H | 4.58840010  | -3.01649950 | 14.03456890 |
| H | 6.27256770  | -2.92000070 | 17.10151750 |
| H | 5.08319300  | -2.00905550 | 18.06184560 |
| H | 0.99656680  | -4.89819400 | 14.55774270 |
| N | 3.26784850  | 0.72764100  | 13.37486600 |
| O | 3.50868040  | 0.37797350  | 12.21498600 |
| O | 2.03447380  | 0.71307490  | 13.77315670 |
| O | 4.13576740  | 1.10889000  | 14.15316690 |
| N | -3.38296340 | -4.81726190 | 14.36474660 |
| O | -4.34790510 | -4.38611160 | 13.71936270 |
| O | -2.98820680 | -4.20981310 | 15.40216220 |
| O | -2.75778150 | -5.83862250 | 13.98486950 |
| N | 2.84350410  | -2.65031230 | 19.52617860 |
| O | 2.07717050  | -3.02867050 | 20.41875710 |
| O | 3.68978010  | -1.74380040 | 19.75122980 |
| O | 2.76937080  | -3.14741600 | 18.36681040 |
| C | -0.38371580 | 0.06987370  | 17.85430990 |
| C | 1.07981060  | -0.40223140 | 18.00457330 |
| N | 1.87019260  | 0.08369520  | 16.85050980 |
| C | 1.80119300  | 1.55445730  | 16.81203410 |
| C | 0.33263080  | 1.99203520  | 16.57467660 |
| N | -0.54610520 | 0.80885100  | 16.58374450 |
| H | -0.68657660 | 0.71738710  | 18.70216510 |
| H | 1.52256080  | -0.03630500 | 18.94863200 |
| H | 2.18437190  | 1.98148650  | 17.75952380 |
| H | 0.01262190  | 2.72165140  | 17.34573290 |
| C | 1.16923610  | -3.42992250 | 12.60327100 |
| C | 1.26714570  | -2.17019850 | 11.70536190 |
| N | 0.22732950  | -1.20479710 | 12.10422890 |
| C | -1.10254890 | -1.82897160 | 11.96869040 |
| C | -1.19542670 | -3.05997680 | 12.89944640 |
| N | 0.09838490  | -3.24696750 | 13.59674430 |
| H | 0.97959680  | -4.33232560 | 11.98958660 |
| H | 2.24401490  | -1.67891150 | 11.81730480 |
| H | -1.86657550 | -1.09020600 | 12.24521960 |

|    |             |             |             |
|----|-------------|-------------|-------------|
| H  | -1.96803990 | -2.90540250 | 13.65949420 |
| H  | 2.11396440  | -3.57819980 | 13.14307210 |
| H  | -1.46342540 | -3.97160720 | 12.33534190 |
| H  | -1.27711060 | -2.11361100 | 10.91081320 |
| H  | 1.14943040  | -2.44291460 | 10.63707730 |
| H  | 2.43719290  | 1.90666730  | 15.99069780 |
| H  | 0.23444590  | 2.47594190  | 15.59151140 |
| H  | 1.13056540  | -1.49584140 | 18.01426940 |
| H  | -1.05613590 | -0.79890380 | 17.83746590 |
| H  | -1.98286890 | 1.94965430  | 15.57649810 |
| H  | -2.45755550 | 1.48048590  | 17.22662090 |
| H  | -0.93773480 | -6.62839280 | 17.58582780 |
| H  | -5.70292970 | 0.96330790  | 15.65351570 |
| H  | -5.58038850 | -1.56932610 | 15.63212360 |
| Eu | 0.49356080  | -0.85319520 | 14.75149690 |
| C  | 6.28538456  | -3.80948863 | 15.11594986 |
| H  | 6.92243242  | -2.95160748 | 15.06018292 |
| C  | 6.40734031  | -0.78852674 | 16.83122040 |
| H  | 6.42417650  | -0.57626929 | 15.78261975 |
| C  | 6.58545560  | -4.74943776 | 13.93355695 |
| H  | 7.56869201  | -5.15716343 | 14.04267126 |
| H  | 6.52686552  | -4.19992613 | 13.01731235 |
| C  | 5.55472710  | -5.89345223 | 13.91282865 |
| H  | 5.14893412  | -6.02574265 | 14.89401737 |
| H  | 4.76676500  | -5.65127940 | 13.23064974 |
| C  | 6.24211386  | -7.19561477 | 13.46174976 |
| H  | 6.72258370  | -7.03718740 | 12.51890858 |
| H  | 6.97128661  | -7.48462195 | 14.18954229 |
| C  | 5.18851936  | -8.30983949 | 13.32018036 |
| H  | 4.66217062  | -8.42258429 | 14.24492120 |
| H  | 4.49726454  | -8.05074498 | 12.54562449 |
| H  | 5.67408033  | -9.23035804 | 13.07163228 |
| C  | 6.54032388  | -4.55297344 | 16.44027471 |
| H  | 7.12744510  | -3.93625619 | 17.08823189 |
| H  | 5.60512424  | -4.77526324 | 16.91026289 |
| C  | 7.29623568  | -5.86413855 | 16.15559353 |
| H  | 6.59257263  | -6.64725427 | 15.96457500 |
| H  | 7.92614806  | -5.73423171 | 15.30047096 |
| H  | 7.89519761  | -6.12193364 | 17.00393680 |
| C  | -5.51093116 | 0.19305929  | 17.65287102 |
| H  | -5.40088797 | -0.87098711 | 17.67727884 |
| C  | -7.00711869 | 0.55547028  | 17.69387254 |
| H  | -7.12307498 | 1.60896827  | 17.54691629 |
| H  | -7.52316103 | 0.02830326  | 16.91882723 |
| C  | -7.59370011 | 0.16035802  | 19.06186689 |
| H  | -7.05238893 | 0.65797084  | 19.83921088 |
| H  | -7.51260292 | -0.89856022 | 19.19231003 |
| C  | -9.07608397 | 0.57310598  | 19.12332590 |

|   |              |             |             |
|---|--------------|-------------|-------------|
| H | -9.15755277  | 1.63139793  | 18.98811871 |
| H | -9.61829296  | 0.07182217  | 18.34897201 |
| C | -4.79955641  | 0.81077834  | 18.87105374 |
| H | -4.04911838  | 0.13569990  | 19.22603524 |
| H | -4.34186750  | 1.73499395  | 18.58601626 |
| C | -5.82698154  | 1.06992588  | 19.98856891 |
| H | -6.59877258  | 1.71359328  | 19.62123953 |
| H | -6.25605347  | 0.14086239  | 20.30104021 |
| H | -5.33997857  | 1.53537897  | 20.81988204 |
| C | -9.66083751  | 0.18417846  | 20.49387276 |
| H | -9.25230634  | 0.82173694  | 21.24986315 |
| H | -10.72498146 | 0.29375182  | 20.47170667 |
| H | -9.41151434  | -0.83318216 | 20.71231113 |
| C | -4.80518246  | -1.23304537 | 13.64684278 |
| H | -4.39160145  | -0.29423853 | 13.34271706 |
| C | -6.31135335  | -1.25825781 | 13.32682156 |
| H | -6.80344118  | -1.94752493 | 13.98077906 |
| H | -6.72187276  | -0.27992137 | 13.46549974 |
| C | -4.10034946  | -2.37389764 | 12.88969910 |
| H | -3.43517830  | -1.96052740 | 12.16060900 |
| H | -3.54431143  | -2.97114974 | 13.58180577 |
| C | -5.15314499  | -3.25009704 | 12.18578422 |
| H | -5.85802108  | -3.60894587 | 12.90639314 |
| H | -5.66356925  | -2.66940941 | 11.44607553 |
| H | -4.66933210  | -4.08072353 | 11.71580045 |
| C | -6.51844404  | -1.69951394 | 11.86599766 |
| H | -6.77775315  | -2.73729762 | 11.84023325 |
| H | -5.61458698  | -1.54393785 | 11.31487289 |
| C | -7.65320170  | -0.87105051 | 11.23546344 |
| H | -8.55579139  | -1.02242763 | 11.78982509 |
| H | -7.39152916  | 0.16624966  | 11.25633999 |
| C | -7.86551736  | -1.31765421 | 9.77701660  |
| H | -7.98420327  | -2.38051205 | 9.74315108  |
| H | -8.74314526  | -0.84807780 | 9.38437521  |
| H | -7.01672147  | -1.03467521 | 9.19018747  |
| C | -0.13574064  | 4.68255120  | 12.39110251 |
| H | 0.85817327   | 4.36211289  | 12.15796218 |
| C | -0.18213099  | 5.19730251  | 13.84178478 |
| H | -1.05108826  | 4.80874752  | 14.33049561 |
| H | 0.69468210   | 4.87426249  | 14.36307544 |
| C | -0.23982783  | 6.73621846  | 13.83881940 |
| H | 0.59139559   | 7.12323742  | 13.28729066 |
| H | -1.15213964  | 7.05805134  | 13.38164245 |
| C | -0.18081805  | 7.25491709  | 15.28763601 |
| H | -1.00578479  | 6.85886953  | 15.84214139 |
| H | 0.73658950   | 6.94259721  | 15.74119932 |
| C | -0.54868522  | 5.81400916  | 11.43147776 |
| H | -1.49058467  | 6.21726270  | 11.73988010 |

|   |             |             |             |
|---|-------------|-------------|-------------|
| H | -0.63503928 | 5.42554133  | 10.43823271 |
| C | 0.51828664  | 6.92418622  | 11.45751481 |
| H | 0.86513650  | 7.10893130  | 10.46229401 |
| H | 0.09149623  | 7.81971872  | 11.85847802 |
| H | 1.33956450  | 6.61526509  | 12.06986309 |
| C | -0.25485396 | 8.79313504  | 15.28558679 |
| H | -0.29144999 | 9.14979625  | 16.29373038 |
| H | 0.61020237  | 9.19120050  | 14.79760990 |
| H | -1.13475480 | 9.10716976  | 14.76399624 |
| C | -1.17359127 | 2.49091204  | 9.17734932  |
| H | -2.10948180 | 2.54671651  | 9.69299918  |
| C | -1.09812483 | 3.61503859  | 8.12747108  |
| H | -1.37646319 | 3.22776907  | 7.16963494  |
| H | -0.09859027 | 3.99421636  | 8.08214026  |
| C | -2.06064169 | 4.75081074  | 8.52140371  |
| H | -1.49747824 | 5.62824051  | 8.76195296  |
| H | -2.63586773 | 4.45170545  | 9.37260934  |
| C | -3.00579706 | 5.05422755  | 7.34402545  |
| H | -3.72750853 | 5.78456713  | 7.64508468  |
| H | -3.50822031 | 4.15660141  | 7.04951196  |
| C | -2.18911332 | 5.59841173  | 6.15722671  |
| H | -1.76337645 | 4.78154522  | 5.61282133  |
| H | -2.83004284 | 6.16178534  | 5.51168855  |
| H | -1.40648478 | 6.23000648  | 6.52257672  |
| C | -1.05440781 | 1.12492298  | 8.47630068  |
| H | -0.03061673 | 0.81389200  | 8.47290248  |
| H | -1.64490867 | 0.40250160  | 9.00005262  |
| C | -1.55883840 | 1.24633323  | 7.02633195  |
| H | -2.52083628 | 1.71477309  | 7.02141348  |
| H | -0.87145152 | 1.83730523  | 6.45786791  |
| H | -1.63470826 | 0.27127776  | 6.59226906  |
| C | -1.01662376 | -5.36571760 | 19.22868325 |
| H | -0.34466812 | -6.19828833 | 19.24288168 |
| C | -1.21784410 | -4.84392506 | 20.66355011 |
| H | -2.01406135 | -4.12921401 | 20.67478473 |
| H | -0.31623403 | -4.37880935 | 21.00364811 |
| C | -1.57075118 | -6.02020113 | 21.59276010 |
| H | -0.75682791 | -6.71444237 | 21.61416119 |
| H | -2.44892933 | -6.51128079 | 21.22869429 |
| C | -1.83117920 | -5.49050085 | 23.01515064 |
| H | -2.70855890 | -4.87804816 | 23.01258845 |
| H | -0.99230662 | -4.91052785 | 23.33891616 |
| C | -2.03618558 | -6.67700224 | 23.97524795 |
| H | -2.25722371 | -6.30873222 | 24.95525782 |
| H | -2.84961634 | -7.27969082 | 23.62884228 |
| H | -1.14415610 | -7.26697067 | 24.00872407 |
| C | -2.37246270 | -5.81015370 | 18.64922030 |
| H | -3.14733107 | -5.60704548 | 19.35860459 |



|   |             |              |             |
|---|-------------|--------------|-------------|
| H | -2.56716183 | -5.27272653  | 17.74469596 |
| C | -2.33284880 | -7.32040686  | 18.35061333 |
| H | -3.04500059 | -7.82513860  | 18.96947171 |
| H | -2.57336136 | -7.48690613  | 17.32137492 |
| H | -1.35266048 | -7.69850715  | 18.55351978 |
| C | 0.65922803  | -6.83422201  | 16.16801925 |
| H | 1.51950698  | -6.30243999  | 16.51734433 |
| C | 0.69217422  | -8.27572336  | 16.70893366 |
| H | 0.96761545  | -8.26251765  | 17.74278942 |
| H | -0.27619665 | -8.71847664  | 16.60344721 |
| C | 1.72242106  | -9.09899678  | 15.91369009 |
| H | 1.60755929  | -8.90037983  | 14.86857858 |
| H | 2.71044181  | -8.82744579  | 16.22187034 |
| C | 1.49597134  | -10.59896023 | 16.17907693 |
| H | 1.60917119  | -10.79728408 | 17.22442541 |
| H | 0.50853782  | -10.87087557 | 15.86933978 |
| C | 2.52776449  | -11.42213020 | 15.38573331 |
| H | 2.46181368  | -11.17152281 | 14.34758764 |
| H | 3.51156436  | -11.20161536 | 15.74407816 |
| H | 2.32681035  | -12.46519499 | 15.51431511 |
| C | 0.66404893  | -6.86347054  | 14.62830457 |
| H | -0.25896512 | -6.46581910  | 14.26112832 |
| H | 1.47758267  | -6.27225652  | 14.26288859 |
| C | 0.82643964  | -8.31594603  | 14.14297561 |
| H | 1.86383216  | -8.57808481  | 14.14286616 |
| H | 0.29270278  | -8.97259211  | 14.79783507 |
| H | 0.43561381  | -8.40634826  | 13.15101664 |
| C | 5.76623633  | 0.39226998   | 17.58375266 |
| H | 5.30636808  | 1.05548878   | 16.88121297 |
| H | 5.02627774  | 0.02297569   | 18.26270995 |
| C | 7.84720617  | -0.99781722  | 17.33578338 |
| H | 7.83212459  | -1.60906730  | 18.21387556 |
| H | 8.42505032  | -1.48018325  | 16.57531040 |
| C | 8.47711409  | 0.36688200   | 17.67106243 |
| H | 8.08603851  | 0.72118960   | 18.60188251 |
| H | 9.53903277  | 0.26036668   | 17.74776442 |
| H | 8.24393408  | 1.06728946   | 16.89649386 |
| C | 6.85198626  | 1.15003468   | 18.37022564 |
| H | 7.36552557  | 0.46878643   | 19.01604156 |
| H | 7.54891137  | 1.58671480   | 17.68575076 |
| C | 6.19557194  | 2.25979434   | 19.21233830 |
| H | 5.73787652  | 2.97666826   | 18.56310284 |
| H | 5.45171966  | 1.83048456   | 19.85052079 |
| C | 7.26848831  | 2.95567618   | 20.07035866 |
| H | 8.01265453  | 3.38447423   | 19.43219813 |
| H | 6.81250617  | 3.72713644   | 20.65502040 |
| H | 7.72577177  | 2.23891996   | 20.72001421 |

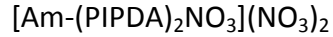

|   |             |             |             |
|---|-------------|-------------|-------------|
| C | 0.38851720  | 0.03057190  | 11.36141470 |
| H | 1.46298920  | 0.27178670  | 11.29326230 |
| H | -0.01796880 | -0.04555010 | 10.33332680 |
| C | -0.02943270 | -4.38918000 | 14.54111290 |
| H | -0.88292470 | -5.04545820 | 14.29830150 |
| C | -0.28054480 | 1.17307550  | 12.12529400 |
| O | -0.68601620 | 0.99338330  | 13.28553780 |
| N | -0.39648320 | 2.36713920  | 11.50088080 |
| C | -1.06485430 | 3.47942140  | 12.16274200 |
| C | 0.05862780  | 2.61489200  | 10.13780410 |
| C | -0.14012130 | -3.89785960 | 15.97730930 |
| O | 0.05656340  | -2.68090260 | 16.23617720 |
| N | -0.36366060 | -4.78666900 | 16.94042440 |
| C | -0.30192930 | -4.34194140 | 18.33823120 |
| C | -0.72923290 | -6.17159970 | 16.63463650 |
| H | -1.29233100 | 3.19940630  | 13.19613970 |
| H | 0.40814540  | 3.65543970  | 10.06356880 |
| H | 0.90242510  | 1.96844380  | 9.86966010  |
| H | -1.47890310 | -6.20611680 | 15.83011180 |
| H | 0.15346680  | -6.77421050 | 16.35656750 |
| H | -1.05720440 | -3.56241600 | 18.52585600 |
| H | 0.69826780  | -3.95457720 | 18.58571980 |
| C | -1.97442710 | 1.13068490  | 16.35775540 |
| C | 3.24719940  | -0.38950880 | 16.91694530 |
| H | 3.91460380  | 0.42100500  | 16.58508140 |
| H | 3.53845240  | -0.68492160 | 17.93967670 |
| C | -2.68318070 | -0.06381760 | 15.70108700 |
| O | -1.98562090 | -0.87180780 | 15.05989810 |
| N | -4.01225730 | -0.20263340 | 15.79366550 |
| C | -4.65207290 | -1.38942820 | 15.20225150 |
| C | -4.90316800 | 0.77534850  | 16.40433070 |
| C | 3.48451520  | -1.53701770 | 15.94850520 |
| O | 2.64780410  | -1.78977500 | 15.03839520 |
| N | 4.63760690  | -2.20392820 | 16.00544060 |
| C | 5.59771190  | -2.03368760 | 17.10004870 |
| C | 4.89991650  | -3.21006260 | 14.98088680 |
| H | -4.85935640 | -1.23319620 | 14.13051570 |
| H | -4.02320000 | -2.28605240 | 15.31411410 |
| H | -4.41205400 | 1.74348280  | 16.55602450 |
| H | 4.27931236  | -4.06454605 | 15.15295812 |
| H | 5.07504220  | -1.93192600 | 18.06292350 |
| H | 0.88447200  | -5.00363270 | 14.48026350 |
| N | 3.25960050  | 0.74690950  | 13.41511290 |
| O | 3.52207910  | 0.31922260  | 12.28545850 |

|    |             |             |             |
|----|-------------|-------------|-------------|
| O  | 2.01616090  | 0.78566000  | 13.77997670 |
| O  | 4.11688630  | 1.15365020  | 14.19203650 |
| N  | -3.47381460 | -4.77267410 | 14.40045990 |
| O  | -4.51339330 | -4.38952530 | 13.85056980 |
| O  | -2.99774180 | -4.12998770 | 15.38320000 |
| O  | -2.85369530 | -5.78261950 | 13.97969260 |
| N  | 2.87015720  | -2.62393740 | 19.53283010 |
| O  | 2.10163100  | -3.01773910 | 20.41597500 |
| O  | 3.70391110  | -1.70717260 | 19.76822470 |
| O  | 2.81268310  | -3.11476990 | 18.36783610 |
| C  | -0.40701030 | 0.04810070  | 17.88194200 |
| C  | 1.06287480  | -0.40894630 | 18.03314830 |
| N  | 1.85287740  | 0.09291170  | 16.88546780 |
| C  | 1.77098660  | 1.56335970  | 16.86041510 |
| C  | 0.29893100  | 1.99437310  | 16.63325600 |
| N  | -0.57478550 | 0.80684210  | 16.62255050 |
| H  | -0.72083340 | 0.67824570  | 18.73891810 |
| H  | 1.49641250  | -0.04447400 | 18.98194690 |
| H  | 2.15351020  | 1.98500180  | 17.81068280 |
| H  | -0.02503180 | 2.70723750  | 17.41828360 |
| C  | 1.16489410  | -3.45744150 | 12.61534680 |
| C  | 1.29280310  | -2.20412620 | 11.71235530 |
| N  | 0.25085590  | -1.22939180 | 12.08086900 |
| C  | -1.07888540 | -1.84646860 | 11.91262490 |
| C  | -1.20892400 | -3.07273520 | 12.84575940 |
| N  | 0.06350420  | -3.27491900 | 13.57758990 |
| H  | 0.99428730  | -4.36327780 | 12.00108660 |
| H  | 2.27037090  | -1.71968100 | 11.84475300 |
| H  | -1.84670430 | -1.10126950 | 12.16014810 |
| H  | -1.99808540 | -2.90888100 | 13.58772460 |
| H  | 2.09364160  | -3.60230200 | 13.18332950 |
| H  | -1.47414200 | -3.98205970 | 12.27636930 |
| H  | -1.22337840 | -2.13609560 | 10.85144280 |
| H  | 1.19702260  | -2.48302990 | 10.64339760 |
| H  | 2.40149000  | 1.92930700  | 16.04071460 |
| H  | 0.19587950  | 2.49827890  | 15.66051850 |
| H  | 1.12530550  | -1.50201750 | 18.03662680 |
| H  | -1.07033230 | -0.82794860 | 17.85057970 |
| H  | -2.01361780 | 1.96148920  | 15.63351320 |
| H  | -2.48642720 | 1.46938970  | 17.27661940 |
| Am | 0.46302710  | -0.86250580 | 14.75351220 |
| H  | -0.41376310 | 4.36872550  | 12.16117120 |
| H  | 6.25422280  | -1.16438100 | 16.92272880 |
| H  | -5.76487120 | 0.94196850  | 15.73880950 |
| C  | -0.60365289 | -5.54717891 | 19.24815725 |
| H  | -1.60181466 | -5.88839186 | 19.06886200 |
| H  | 0.08672813  | -6.33645715 | 19.03528661 |
| C  | -1.35241130 | -6.79799776 | 17.89593510 |

|   |              |             |             |
|---|--------------|-------------|-------------|
| H | -2.04991830  | -6.11113244 | 18.32790734 |
| C | -1.07022333  | 2.41734930  | 9.10908062  |
| H | -1.95901973  | 2.09769719  | 9.61183652  |
| C | -2.37607626  | 3.83652668  | 11.43832998 |
| H | -2.87808543  | 2.93800928  | 11.14583508 |
| C | 6.47463087   | -3.29726101 | 17.17747840 |
| H | 5.84969159   | -4.16579217 | 17.17534979 |
| C | -5.44119533  | 0.27389803  | 17.75735473 |
| H | -4.93485441  | -0.62834075 | 18.03027239 |
| C | -5.98810660  | -1.63136302 | 15.92894365 |
| H | -5.80059552  | -1.82936195 | 16.96361076 |
| C | -5.19731235  | 1.34578534  | 18.83586235 |
| H | -6.07696661  | 1.45541761  | 19.43510284 |
| H | -4.37804153  | 1.04764728  | 19.45619212 |
| C | -4.86652247  | 2.68897965  | 18.15910013 |
| H | -3.82639983  | 2.71597708  | 17.90946837 |
| H | -5.44995172  | 2.79269668  | 17.26817192 |
| H | -5.09338145  | 3.49152323  | 18.82944245 |
| C | -6.95185771  | -0.00089031 | 17.63907319 |
| H | -7.29537231  | 0.30462800  | 16.67286603 |
| H | -7.13527971  | -1.04708161 | 17.76845687 |
| C | -7.70412477  | 0.79033684  | 18.72519191 |
| H | -7.28839908  | 0.56289383  | 19.68453639 |
| H | -7.60754847  | 1.83869249  | 18.53408082 |
| C | -9.19372331  | 0.40006329  | 18.70562845 |
| H | -9.29096199  | -0.64628387 | 18.90712850 |
| H | -9.60685926  | 0.61779191  | 17.74291721 |
| C | -9.94876336  | 1.20238108  | 19.78163992 |
| H | -10.97748063 | 0.90814199  | 19.78964792 |
| H | -9.51505016  | 1.00915173  | 20.74052222 |
| H | -9.87836480  | 2.24730391  | 19.56236764 |
| C | -6.70491378  | -2.83896420 | 15.29689393 |
| H | -6.93218115  | -2.62340745 | 14.27376890 |
| H | -6.06888032  | -3.69790829 | 15.34765318 |
| C | -6.87720834  | -0.38072618 | 15.79853813 |
| H | -6.97216093  | -0.11670686 | 14.76597927 |
| H | -6.43177049  | 0.43104452  | 16.33474094 |
| C | -8.27074641  | -0.67842313 | 16.38251431 |
| H | -8.16797671  | -1.27859323 | 17.26236331 |
| H | -8.75644946  | 0.24149520  | 16.63299949 |
| H | -8.85605016  | -1.20501269 | 15.65792963 |
| C | -8.01003827  | -3.12056816 | 16.06432425 |
| H | -7.87338689  | -2.88465345 | 17.09900809 |
| H | -8.79743413  | -2.51798314 | 15.66208172 |
| C | -8.37857668  | -4.60898476 | 15.92151160 |
| H | -8.34935204  | -4.88612541 | 14.88843900 |
| H | -7.67877821  | -5.20394467 | 16.47033288 |
| C | -9.79636313  | -4.84222799 | 16.47565887 |

|   |              |              |             |
|---|--------------|--------------|-------------|
| H | -10.08548608 | -5.85731777  | 16.29987300 |
| H | -9.80495755  | -4.64596435  | 17.52747003 |
| H | -10.48373073 | -4.18546037  | 15.98465778 |
| C | -1.34157870  | 3.74798251   | 8.38287022  |
| H | -1.03284623  | 3.66637451   | 7.36163352  |
| H | -0.79270856  | 4.53297281   | 8.85976832  |
| C | -0.64851638  | 1.34923351   | 8.08297541  |
| H | -1.14855452  | 0.42861002   | 8.30049379  |
| H | -0.91388126  | 1.67543396   | 7.09906751  |
| C | 0.87479846   | 1.13664297   | 8.15989847  |
| H | 1.09866180   | 0.43931048   | 8.93997065  |
| H | 1.22897655   | 0.75289595   | 7.22598407  |
| H | 1.35516366   | 2.07001355   | 8.36718721  |
| C | -2.84724048  | 4.06627056   | 8.44010079  |
| H | -3.00448565  | 4.94096621   | 9.03598792  |
| H | -3.37019582  | 3.24001113   | 8.87451196  |
| C | -3.37392145  | 4.31484648   | 7.01447210  |
| H | -4.31590897  | 4.81980370   | 7.06524334  |
| H | -3.49782372  | 3.37848733   | 6.51170000  |
| C | -2.36651785  | 5.18431844   | 6.23938728  |
| H | -1.63252601  | 4.55589560   | 5.77977797  |
| H | -2.88217802  | 5.74103676   | 5.48502709  |
| H | -1.88490053  | 5.86013638   | 6.91482409  |
| C | -0.46240212  | -5.12535386  | 20.72250859 |
| H | -1.15637953  | -4.33960387  | 20.93673349 |
| C | 0.97212028   | -4.62727656  | 20.97875942 |
| H | 1.04436417   | -3.59416978  | 20.70974045 |
| H | 1.21012917   | -4.74336619  | 22.01547296 |
| H | 1.65858072   | -5.19822718  | 20.38910914 |
| C | -0.75686524  | -6.33249874  | 21.63228477 |
| H | -0.64649983  | -6.04263980  | 22.65634593 |
| H | -1.75781831  | -6.67075160  | 21.46323461 |
| C | 0.23045219   | -7.46999209  | 21.31148394 |
| H | -0.23960794  | -8.17730045  | 20.66059350 |
| H | 1.09723548   | -7.06531691  | 20.83208356 |
| C | 0.64678452   | -8.17191943  | 22.61745691 |
| H | -0.22680466  | -8.50812417  | 23.13582774 |
| H | 1.18591602   | -7.48472358  | 23.23551766 |
| C | 1.54448570   | -9.37901118  | 22.28781755 |
| H | 1.79747586   | -9.89273246  | 23.19169056 |
| H | 1.02106275   | -10.04469324 | 21.63375654 |
| H | 2.43864570   | -9.03830106  | 21.80897049 |
| C | -0.24186033  | -7.11130729  | 18.91579473 |
| H | -0.56303697  | -6.81933017  | 19.89380032 |
| H | 0.64430725   | -6.57115151  | 18.65533600 |
| C | 0.05552569   | -8.62226589  | 18.90292292 |
| H | 1.04340862   | -8.79453265  | 19.27616744 |
| H | -0.65349389  | -9.13061384  | 19.52241755 |

|   |             |              |             |
|---|-------------|--------------|-------------|
| H | -0.01671241 | -8.99147262  | 17.90124031 |
| C | -2.08225186 | -8.09965858  | 17.51565644 |
| H | -2.93888864 | -7.86679582  | 16.91828858 |
| H | -1.42041376 | -8.73027416  | 16.95960401 |
| C | -2.53172768 | -8.82885220  | 18.79544086 |
| H | -1.85040210 | -9.62550759  | 19.01000006 |
| H | -2.54317609 | -8.13927086  | 19.61351574 |
| C | -3.94532558 | -9.40393888  | 18.58900376 |
| H | -3.97085722 | -9.97060169  | 17.68173236 |
| H | -4.65127671 | -8.60212950  | 18.52871510 |
| C | -4.30613464 | -10.31746051 | 19.77512983 |
| H | -5.23985794 | -10.80246847 | 19.58063540 |
| H | -3.54119113 | -11.05459413 | 19.90317459 |
| H | -4.38804676 | -9.73003821  | 20.66570574 |
| C | 7.30620566  | -3.26637603  | 18.47329068 |
| H | 6.66057895  | -3.40724133  | 19.31485062 |
| H | 8.03517595  | -4.04923210  | 18.44801801 |
| C | 8.01782770  | -1.90602287  | 18.59425907 |
| H | 7.35194071  | -1.19299417  | 19.03367298 |
| H | 8.88563697  | -2.01109206  | 19.21132271 |
| H | 8.31034391  | -1.56880232  | 17.62183089 |
| C | 7.41941992  | -3.34168342  | 15.96215940 |
| H | 7.17148687  | -4.18219905  | 15.34818653 |
| H | 7.31250450  | -2.44120315  | 15.39417667 |
| C | 8.87492514  | -3.47241006  | 16.44797327 |
| H | 9.22782965  | -2.51777082  | 16.77815856 |
| H | 8.91903837  | -4.16899105  | 17.25897818 |
| C | 9.75902102  | -3.97454761  | 15.29132625 |
| H | 9.42529270  | -4.94288978  | 14.98174775 |
| H | 9.69058729  | -3.29383394  | 14.46861991 |
| C | 11.22192921 | -4.06271491  | 15.76432327 |
| H | 11.28585227 | -4.72146606  | 16.60507338 |
| H | 11.83172236 | -4.43862759  | 14.96950129 |
| H | 11.56464877 | -3.08931009  | 16.04703578 |
| H | 5.92846054  | -3.50202633  | 15.02277164 |
| C | 4.58952119  | -2.62149429  | 13.59205920 |
| H | 3.58442207  | -2.86538548  | 13.31784608 |
| C | 4.75284104  | -1.09078246  | 13.63504664 |
| H | 3.79222596  | -0.62709092  | 13.55073274 |
| H | 5.20609919  | -0.80633328  | 14.56162406 |
| C | 5.64637548  | -0.63683454  | 12.46580437 |
| H | 5.03272449  | -0.36740049  | 11.63169541 |
| H | 6.22784666  | 0.20876909   | 12.76869999 |
| H | 6.29938743  | -1.43646703  | 12.18462244 |
| C | 5.56239749  | -3.21261712  | 12.55490660 |
| H | 5.57762336  | -4.27852816  | 12.64711200 |
| H | 6.54510466  | -2.82569331  | 12.72659402 |
| C | 5.09899596  | -2.82650574  | 11.13794612 |

|   |             |             |             |
|---|-------------|-------------|-------------|
| H | 5.86125970  | -2.24859459 | 10.65849571 |
| H | 4.20048207  | -2.24898505 | 11.20152804 |
| C | 4.83169290  | -4.10335244 | 10.31952595 |
| H | 5.73392171  | -4.67349288 | 10.24321704 |
| H | 4.08010722  | -4.68857637 | 10.80689840 |
| C | 4.34757645  | -3.71733776 | 8.90948201  |
| H | 5.06325369  | -3.06631626 | 8.45245125  |
| H | 4.23856721  | -4.60066246 | 8.31555065  |
| H | 3.40454193  | -3.21682963 | 8.98073869  |
| C | -3.28178409 | 4.64559833  | 12.38527053 |
| H | -4.17723153 | 4.92475191  | 11.87034610 |
| H | -3.53164225 | 4.04798948  | 13.23693628 |
| C | -2.53910776 | 5.91300709  | 12.84755498 |
| H | -1.90986015 | 5.67424946  | 13.67938564 |
| H | -1.94078179 | 6.28885924  | 12.04403697 |
| C | -3.56321987 | 6.98310171  | 13.26909015 |
| H | -3.04960686 | 7.82218003  | 13.68986235 |
| H | -4.12150170 | 7.29939779  | 12.41283190 |
| C | -4.52304187 | 6.39032057  | 14.31739938 |
| H | -5.25095988 | 5.77732129  | 13.82824987 |
| H | -3.96809177 | 5.79774061  | 15.01437814 |
| H | -5.01696300 | 7.18403261  | 14.83794056 |
| C | -2.05907199 | 4.67775339  | 10.18795166 |
| H | -1.99746519 | 4.03702073  | 9.33321997  |
| H | -1.12486708 | 5.18131119  | 10.32429940 |
| C | -3.17529215 | 5.71640898  | 9.97150967  |
| H | -4.12803800 | 5.23219957  | 10.02363053 |
| H | -3.11518964 | 6.46802740  | 10.73069175 |
| H | -3.05820402 | 6.17066296  | 9.00982174  |

[Eu-(DADA)<sub>2</sub>NO<sub>3</sub>](NO<sub>3</sub>)<sub>2</sub>

|   |             |             |             |
|---|-------------|-------------|-------------|
| C | -1.94410850 | -0.82861520 | -2.28429730 |
| N | -1.79263770 | -0.93317430 | -0.82143000 |
| C | -0.51399340 | -1.59830820 | -0.49765230 |
| C | 0.65623680  | -0.66943470 | -0.78472290 |
| N | 1.88687540  | -1.17445830 | -0.87019440 |
| C | -2.94243480 | -1.69433970 | -0.27559890 |
| C | -3.10619960 | -1.56410750 | 1.22902270  |
| N | -3.28349920 | -0.16454720 | 1.67820710  |
| C | -3.12912460 | -0.10465630 | 3.13563280  |
| C | -2.78981510 | 1.30929230  | 3.60192720  |
| N | -3.20855080 | 1.74965460  | 4.80671640  |
| C | -3.90347950 | 0.94703510  | 5.80534550  |
| O | 0.41574440  | 0.55911400  | -0.93690820 |
| C | 3.01718470  | -0.32307080 | -1.23586530 |
| C | -4.61092950 | 0.35714100  | 1.30018840  |

|    |             |             |             |
|----|-------------|-------------|-------------|
| O  | -2.08684650 | 2.02258710  | 2.86841580  |
| C  | -2.92496830 | 3.13317510  | 5.18564550  |
| H  | -2.85207540 | -2.77248880 | -0.50523230 |
| H  | -3.84252250 | -1.33046460 | -0.79479730 |
| H  | -3.97076860 | -2.18663460 | 1.53402470  |
| H  | -2.23946410 | -1.99993810 | 1.74486230  |
| H  | -4.70189630 | 0.41239360  | 0.20674990  |
| H  | -1.10175520 | -0.27152020 | -2.71193740 |
| H  | -4.02802870 | -0.50835350 | 3.63364730  |
| H  | -2.27956300 | -0.74592610 | 3.42334900  |
| H  | -0.48268750 | -1.85811380 | 0.57229330  |
| H  | -0.41618020 | -2.55465710 | -1.04148630 |
| H  | -1.92858660 | 3.22875170  | 5.65208300  |
| H  | -2.98211340 | 3.78168560  | 4.30426060  |
| H  | -4.95498460 | 1.26629520  | 5.91071550  |
| H  | -3.40911510 | 1.06946840  | 6.78305430  |
| H  | 2.64854360  | 0.60376390  | -1.68751770 |
| H  | 3.61770850  | -0.09600700 | -0.34134140 |
| C  | 2.25789940  | -2.51875630 | -0.41526680 |
| H  | 2.94889030  | -2.40253450 | 0.43536840  |
| H  | 1.39707850  | -3.11094160 | -0.07925950 |
| Eu | -1.38817310 | 1.47719610  | 0.43350630  |
| C  | 0.24627120  | 3.43542050  | -2.24339860 |
| N  | -0.50730960 | 3.81480600  | -1.03701240 |
| C  | -1.77535100 | 4.42752310  | -1.43034840 |
| C  | -2.78958230 | 3.36857340  | -1.85827710 |
| N  | -3.96564110 | 3.79482900  | -2.36391670 |
| C  | 0.28704940  | 4.68370130  | -0.12998250 |
| C  | 0.31110620  | 4.21448770  | 1.32998650  |
| N  | 0.73749660  | 2.80985420  | 1.46725750  |
| C  | 0.82945690  | 2.37943090  | 2.87342820  |
| C  | 0.59068050  | 0.86435920  | 2.96653290  |
| N  | 0.98965170  | 0.19598430  | 4.05166570  |
| C  | 1.64828110  | 0.80979980  | 5.20651430  |
| O  | -2.52659590 | 2.15845090  | -1.72014340 |
| C  | -5.02726580 | 2.83208300  | -2.63378320 |
| C  | 2.04984830  | 2.55980510  | 0.83428540  |
| O  | -0.01303100 | 0.29698850  | 2.02294960  |
| C  | 0.92392510  | -1.27001990 | 4.09531770  |
| H  | -0.09667080 | 5.71848740  | -0.14388550 |
| H  | 1.31590040  | 4.74015190  | -0.51289440 |
| H  | 0.98772370  | 4.89697600  | 1.88713630  |
| H  | -0.69359440 | 4.32605290  | 1.77170670  |
| H  | 1.98174610  | 2.62486050  | -0.25416890 |
| H  | -0.36893850 | 2.77528630  | -2.86767560 |
| H  | 1.81670900  | 2.63408090  | 3.29197920  |
| H  | 0.04605350  | 2.87891120  | 3.46145260  |
| H  | -2.21489620 | 4.95779260  | -0.57124140 |



|   |             |             |             |
|---|-------------|-------------|-------------|
| H | -1.62335640 | 5.16712360  | -2.24378310 |
| H | 1.95301590  | -1.65799460 | 4.15407090  |
| H | 0.44191000  | -1.66740910 | 3.19738070  |
| H | 2.72554110  | 0.58123850  | 5.19422700  |
| H | 1.19957290  | 0.39166830  | 6.12219300  |
| H | -4.60029640 | 1.82471660  | -2.67101220 |
| H | -5.50559000 | 3.06275820  | -3.59875360 |
| C | -4.35143840 | 5.20360380  | -2.36855680 |
| H | -5.18947860 | 5.33832590  | -3.06618240 |
| H | -4.66804040 | 5.54331990  | -1.36697940 |
| N | -3.68162720 | 3.96503270  | 1.51450670  |
| O | -3.25715710 | 5.12583210  | 1.44450220  |
| O | -3.21406410 | 3.09585030  | 0.68846910  |
| O | -4.54162500 | 3.62021660  | 2.32283200  |
| N | 3.88381140  | 0.10606530  | 2.94355710  |
| O | 4.14960190  | -0.67144370 | 3.87731900  |
| O | 3.47759880  | -0.35000000 | 1.84230330  |
| O | 3.98789380  | 1.34221540  | 3.10043090  |
| N | -1.01662720 | -4.25386970 | 1.19248400  |
| O | -0.22506830 | -4.68461410 | 0.33263000  |
| O | -0.60590390 | -3.44537620 | 2.07116870  |
| O | -2.21593110 | -4.58189720 | 1.17242610  |
| C | -3.23479398 | -0.05967648 | -2.62262296 |
| H | -3.71841500 | 0.24138755  | -1.71687953 |
| H | -2.99243264 | 0.80634442  | -3.20242359 |
| H | -3.89030891 | -0.69249907 | -3.18363610 |
| C | -2.00352508 | -2.22418505 | -2.93272189 |
| H | -3.02516557 | -2.52003300 | -3.04944681 |
| H | -1.49707351 | -2.92972085 | -2.30772106 |
| C | -1.32145477 | -2.17851045 | -4.31268346 |
| H | -1.57489190 | -3.05912198 | -4.86512616 |
| H | -1.65535132 | -1.31376526 | -4.84712603 |
| H | -0.26021525 | -2.13090916 | -4.18460222 |
| C | -4.80639788 | 1.78237055  | 1.84983632  |
| H | -3.89398094 | 2.12157837  | 2.29405854  |
| H | -5.07932390 | 2.43874974  | 1.05010027  |
| H | -5.58170121 | 1.77704001  | 2.58724823  |
| C | -5.72756136 | -0.56113210 | 1.83076150  |
| H | -6.14367113 | -1.12177636 | 1.01994052  |
| H | -5.32144431 | -1.23312413 | 2.55766979  |
| C | -6.82981063 | 0.29466982  | 2.48210596  |
| H | -7.09296550 | 1.09738375  | 1.82537172  |
| H | -7.69124251 | -0.31284933 | 2.66583296  |
| H | -6.47107207 | 0.69409041  | 3.40767056  |
| C | 0.64630500  | 4.67109699  | -3.07085045 |
| H | 1.70064025  | 4.65274142  | -3.25234499 |
| H | 0.39276992  | 5.55932710  | -2.53078820 |
| C | -0.10621489 | 4.65480404  | -4.41437133 |

|   |              |             |             |
|---|--------------|-------------|-------------|
| H | -1.00756997  | 5.22446705  | -4.32524733 |
| H | 0.51261911   | 5.08303273  | -5.17500572 |
| H | -0.34654833  | 3.64559187  | -4.67634584 |
| C | 1.51419016   | 2.64594244  | -1.86829072 |
| H | 1.70525848   | 1.90276016  | -2.61399374 |
| H | 2.34697033   | 3.31527255  | -1.81020119 |
| H | 1.37129795   | 2.17126138  | -0.92005041 |
| C | 3.10000240   | 3.56179148  | 1.34887230  |
| H | 3.93816970   | 3.02784081  | 1.74544795  |
| H | 2.66777153   | 4.16851155  | 2.11696554  |
| C | 3.56591103   | 4.45904391  | 0.18720660  |
| H | 3.62644420   | 3.87862462  | -0.70964856 |
| H | 2.86580375   | 5.25639803  | 0.04945244  |
| H | 4.52920079   | 4.86552449  | 0.41468491  |
| C | 2.55761362   | 1.15329289  | 1.20238565  |
| H | 3.44314655   | 0.93593130  | 0.64248801  |
| H | 2.77909570   | 1.11653115  | 2.24856645  |
| H | 1.80339641   | 0.43016463  | 0.97186035  |
| C | -6.09899694  | 2.87787887  | -1.52884198 |
| H | -5.82286561  | 3.60501599  | -0.79404738 |
| C | -6.21052643  | 1.49318362  | -0.86417647 |
| H | -5.29812264  | 0.95339200  | -1.00924309 |
| H | -6.39075047  | 1.61397062  | 0.18359727  |
| C | -7.37584735  | 0.71154232  | -1.49873460 |
| H | -7.32002473  | 0.79069893  | -2.56434150 |
| H | -7.31195008  | -0.31781698 | -1.21371429 |
| C | -7.45662083  | 3.26183619  | -2.14612161 |
| H | -7.62981336  | 2.67200519  | -3.02190910 |
| H | -8.23551411  | 3.08162637  | -1.43496081 |
| C | -8.71347491  | 1.29748272  | -1.00983136 |
| H | -9.25454342  | 1.69490503  | -1.84301823 |
| H | -8.52382995  | 2.07782857  | -0.30272801 |
| C | -9.54531469  | 0.18831734  | -0.33946227 |
| H | -9.65607898  | 0.40582683  | 0.70232509  |
| H | -10.51072166 | 0.13981558  | -0.79830535 |
| H | -9.04710978  | -0.75134398 | -0.45663082 |
| C | -7.44395241  | 4.75407644  | -2.52646162 |
| H | -7.01815678  | 5.32252078  | -1.72616848 |
| H | -6.85928722  | 4.89148888  | -3.41200352 |
| H | -8.44561119  | 5.08503551  | -2.70547499 |
| C | -3.19770325  | 6.10454609  | -2.84688534 |
| H | -2.62989608  | 6.43539348  | -2.00247133 |
| C | -3.77327283  | 7.32526639  | -3.58861414 |
| H | -4.21703157  | 7.00690600  | -4.50873633 |
| H | -4.51578332  | 7.79580643  | -2.97855658 |
| C | -2.64150143  | 8.32696127  | -3.88408136 |
| H | -1.95155077  | 7.89154646  | -4.57638334 |
| H | -2.13097032  | 8.56668028  | -2.97479989 |

|   |             |             |             |
|---|-------------|-------------|-------------|
| C | -3.23752668 | 9.61031136  | -4.49183661 |
| H | -3.78267844 | 9.36487743  | -5.37923266 |
| H | -3.89632569 | 10.06775094 | -3.78357614 |
| C | -2.10076275 | 10.58853128 | -4.84177025 |
| H | -1.43753060 | 10.12811827 | -5.54394044 |
| H | -2.51433565 | 11.47693057 | -5.27142611 |
| H | -1.56059284 | 10.84021700 | -3.95307977 |
| C | -2.28561685 | 5.30859488  | -3.79880974 |
| H | -1.26657682 | 5.41908563  | -3.49180939 |
| H | -2.55654372 | 4.27385788  | -3.77020947 |
| C | -2.45025448 | 5.84286759  | -5.23374775 |
| H | -3.45362597 | 6.18742862  | -5.37311539 |
| H | -1.76959587 | 6.65295514  | -5.39300238 |
| H | -2.24193260 | 5.05943428  | -5.93212748 |
| C | -3.98683749 | 3.59270540  | 6.20194552  |
| H | -4.95706711 | 3.29420056  | 5.86364191  |
| C | -3.87294562 | -0.55333320 | 5.45956716  |
| H | -2.90088999 | -0.81626509 | 5.09780110  |
| C | -3.93928291 | 5.12611011  | 6.33614156  |
| H | -4.60177001 | 5.56743047  | 5.62112605  |
| H | -2.94164475 | 5.46903249  | 6.15719371  |
| C | -4.37409524 | 5.53079097  | 7.75697640  |
| H | -5.34554948 | 5.13092269  | 7.96015619  |
| H | -3.67368515 | 5.14478954  | 8.46784107  |
| C | -4.41880644 | 7.06653644  | 7.86227002  |
| H | -5.13672168 | 7.45087873  | 7.16816721  |
| H | -3.45317402 | 7.46784890  | 7.63554916  |
| C | -4.82004508 | 7.47152584  | 9.29286121  |
| H | -4.86073301 | 8.53842515  | 9.36336192  |
| H | -5.78135518 | 7.06194447  | 9.52313492  |
| H | -4.09682957 | 7.09559650  | 9.98606858  |
| C | -3.69985561 | 2.94845458  | 7.57095329  |
| H | -3.44345385 | 3.71045110  | 8.27701239  |
| H | -2.88591896 | 2.26019446  | 7.47765195  |
| C | -4.95336085 | 2.19807873  | 8.05804743  |
| H | -4.72719633 | 1.15774243  | 8.16505210  |
| H | -5.26209904 | 2.59494469  | 9.00254631  |
| H | -5.74172878 | 2.32018426  | 7.34497923  |
| C | -4.19146838 | -1.37740614 | 6.72093429  |
| H | -3.48433340 | -1.14206498 | 7.48870683  |
| H | -5.17842903 | -1.14224069 | 7.06079587  |
| C | -4.10725125 | -2.87865651 | 6.38813587  |
| H | -4.79579775 | -3.10891555 | 5.60214320  |
| H | -3.11325177 | -3.11897849 | 6.07331786  |
| C | -4.46265808 | -3.70262145 | 7.63968202  |
| H | -5.45965638 | -3.46843896 | 7.94960613  |
| H | -3.77920145 | -3.46620354 | 8.42828433  |
| C | -4.36679914 | -5.20389875 | 7.31017096  |

|   |             |             |            |
|---|-------------|-------------|------------|
| H | -3.36372941 | -5.44303186 | 7.02457249 |
| H | -4.63822809 | -5.77635444 | 8.17244748 |
| H | -5.03183667 | -5.43540477 | 6.50454695 |
| C | -4.92292233 | -0.85120259 | 4.37309456 |
| H | -5.13490648 | 0.04415847  | 3.82693406 |
| H | -4.54315852 | -1.59533049 | 3.70454903 |
| C | -6.21437591 | -1.36673457 | 5.03489093 |
| H | -6.36543877 | -2.39260111 | 4.77092529 |
| H | -6.12918128 | -1.28082438 | 6.09802841 |
| H | -7.04581597 | -0.78497234 | 4.69553843 |
| C | 1.44717313  | 2.33643424  | 5.22981385 |
| H | 2.13524811  | 2.79720683  | 4.55221408 |
| C | 0.00552314  | 2.67084906  | 4.80388894 |
| H | 0.01333024  | 3.52320597  | 4.15710711 |
| H | -0.41668944 | 1.83461943  | 4.28682363 |
| C | -0.83969220 | 2.98205253  | 6.05303402 |
| H | -1.37393150 | 3.89697106  | 5.90332612 |
| H | -1.53509743 | 2.18626546  | 6.22046910 |
| H | -0.19730741 | 3.07914677  | 6.90321900 |
| C | 1.69740174  | 2.86548520  | 6.65427541 |
| H | 1.37484591  | 3.88369449  | 6.71836578 |
| H | 1.14903905  | 2.27277188  | 7.35633615 |
| C | 3.20110172  | 2.78213981  | 6.97605161 |
| H | 3.49606240  | 1.75550968  | 7.03873157 |
| H | 3.75884384  | 3.26687112  | 6.20219162 |
| C | 3.47754659  | 3.47872362  | 8.32139514 |
| H | 2.91460316  | 2.99822870  | 9.09413011 |
| H | 3.18883190  | 4.50699547  | 8.25658130 |
| C | 4.97974225  | 3.38691799  | 8.64786095 |
| H | 5.53894367  | 3.91897094  | 7.90683907 |
| H | 5.16258537  | 3.81765131  | 9.61011726 |
| H | 5.28143062  | 2.36034465  | 8.65345657 |
| C | 0.13658099  | -1.71552042 | 5.34159958 |
| H | -0.39884506 | -0.88040087 | 5.74259121 |
| C | 1.11519055  | -2.25469158 | 6.40141927 |
| H | 0.95447051  | -1.74404907 | 7.32787127 |
| H | 2.12076685  | -2.09168422 | 6.07408929 |
| C | 0.87783843  | -3.76341465 | 6.59895072 |
| H | 0.17403299  | -3.91306721 | 7.39088633 |
| H | 0.49200091  | -4.18519887 | 5.69444673 |
| C | 2.20875756  | -4.44969536 | 6.95849633 |
| H | 2.68927157  | -3.90613606 | 7.74497557 |
| H | 2.84429681  | -4.46840797 | 6.09789207 |
| C | 1.93339391  | -5.89136260 | 7.42472637 |
| H | 2.86047918  | -6.37849710 | 7.64407284 |
| H | 1.32407890  | -5.87159848 | 8.30406964 |
| H | 1.42429961  | -6.42566968 | 6.64997548 |
| C | -0.85875920 | -2.82379729 | 4.95093312 |

|   |             |             |             |
|---|-------------|-------------|-------------|
| H | -0.36532686 | -3.54480856 | 4.33322180  |
| H | -1.67784286 | -2.39415266 | 4.41296710  |
| C | -1.38540459 | -3.51272354 | 6.22357811  |
| H | -1.40626093 | -2.80770058 | 7.02819457  |
| H | -2.37422793 | -3.88120001 | 6.04650894  |
| H | -0.74164066 | -4.32793939 | 6.48027079  |
| C | 3.88729070  | -1.07833181 | -2.25767563 |
| H | 3.25648106  | -1.58564330 | -2.95740004 |
| C | 4.76811724  | -2.10535338 | -1.52216811 |
| H | 4.32272495  | -3.07540395 | -1.59651586 |
| H | 4.85264706  | -1.82972413 | -0.49173945 |
| C | 6.16831557  | -2.13292696 | -2.16270254 |
| H | 6.73125199  | -2.94624238 | -1.75463317 |
| H | 6.07398981  | -2.25993869 | -3.22094196 |
| H | 6.67256957  | -1.21175802 | -1.95757893 |
| C | 4.78446400  | -0.07642172 | -3.00791309 |
| H | 5.41471972  | 0.43145311  | -2.30809820 |
| H | 4.17244915  | 0.63668840  | -3.51958856 |
| C | 5.65538363  | -0.83181746 | -4.02893036 |
| H | 6.66178835  | -0.88458415 | -3.66939561 |
| H | 5.27171366  | -1.82179882 | -4.16172436 |
| C | 5.63003044  | -0.08643536 | -5.37628434 |
| H | 4.67934710  | -0.23042758 | -5.84571743 |
| H | 5.79069146  | 0.95813860  | -5.20909199 |
| C | 6.74171879  | -0.63721798 | -6.28863708 |
| H | 6.71583649  | -0.12824150 | -7.22947344 |
| H | 7.69341105  | -0.48159463 | -5.82499583 |
| H | 6.58831532  | -1.68450434 | -6.44534915 |
| C | 2.97051257  | -3.27369558 | -1.55274171 |
| H | 3.15662213  | -2.60216565 | -2.36472126 |
| C | 2.07851464  | -4.43139935 | -2.03819169 |
| H | 1.43808838  | -4.74664515 | -1.24108800 |
| H | 1.48383936  | -4.10129026 | -2.86419974 |
| C | 2.96413993  | -5.61049469 | -2.48204081 |
| H | 3.44043777  | -5.36950065 | -3.40938230 |
| H | 3.70870329  | -5.79764799 | -1.73672272 |
| C | 2.09263754  | -6.86707991 | -2.66391206 |
| H | 1.33907703  | -6.67518008 | -3.39890936 |
| H | 1.62764592  | -7.11642492 | -1.73304695 |
| C | 2.97493948  | -8.04098649 | -3.12768639 |
| H | 2.37932726  | -8.92666555 | -3.20330835 |
| H | 3.39819154  | -7.81310472 | -4.08362969 |
| H | 3.76032739  | -8.19882523 | -2.41835377 |
| C | 4.30726469  | -3.83743182 | -1.03612269 |
| H | 4.13179272  | -4.76318227 | -0.52907665 |
| H | 4.75118356  | -3.13826086 | -0.35863024 |
| C | 5.25765345  | -4.07506270 | -2.22435363 |
| H | 4.92599310  | -3.50381582 | -3.06612463 |

|   |            |             |             |
|---|------------|-------------|-------------|
| H | 6.24784999 | -3.77173348 | -1.95527707 |
| H | 5.25945201 | -5.11474596 | -2.47724787 |

[Am-(DADA)<sub>2</sub>NO<sub>3</sub>](NO<sub>3</sub>)<sub>2</sub>

|   |             |             |             |
|---|-------------|-------------|-------------|
| C | -1.94410850 | -0.82861520 | -2.28429730 |
| N | -1.79263770 | -0.93317430 | -0.82143000 |
| C | -0.51399340 | -1.59830820 | -0.49765230 |
| C | 0.65623680  | -0.66943470 | -0.78472290 |
| N | 1.88687540  | -1.17445830 | -0.87019440 |
| C | -2.94243480 | -1.69433970 | -0.27559890 |
| C | -3.10619960 | -1.56410750 | 1.22902270  |
| N | -3.28349920 | -0.16454720 | 1.67820710  |
| C | -3.12912460 | -0.10465630 | 3.13563280  |
| C | -2.78981510 | 1.30929230  | 3.60192720  |
| N | -3.20855080 | 1.74965460  | 4.80671640  |
| C | -3.90347950 | 0.94703510  | 5.80534550  |
| O | 0.41574440  | 0.55911400  | -0.93690820 |
| C | 3.01718470  | -0.32307080 | -1.23586530 |
| C | -4.61092950 | 0.35714100  | 1.30018840  |
| O | -2.08684650 | 2.02258710  | 2.86841580  |
| C | -2.92496830 | 3.13317510  | 5.18564550  |
| H | -2.85207540 | -2.77248880 | -0.50523230 |
| H | -3.84252250 | -1.33046460 | -0.79479730 |
| H | -3.97076860 | -2.18663460 | 1.53402470  |
| H | -2.23946410 | -1.99993810 | 1.74486230  |
| H | -4.70189630 | 0.41239360  | 0.20674990  |
| H | -1.10175520 | -0.27152020 | -2.71193740 |
| H | -4.02802870 | -0.50835350 | 3.63364730  |
| H | -2.27956300 | -0.74592610 | 3.42334900  |
| H | -0.48268750 | -1.85811380 | 0.57229330  |
| H | -0.41618020 | -2.55465710 | -1.04148630 |
| H | -1.92858660 | 3.22875170  | 5.65208300  |
| H | -2.98211340 | 3.78168560  | 4.30426060  |
| H | -4.95498460 | 1.26629520  | 5.91071550  |
| H | -3.40911510 | 1.06946840  | 6.78305430  |
| H | 2.64854360  | 0.60376390  | -1.68751770 |
| H | 3.61770850  | -0.09600700 | -0.34134140 |
| C | 2.25789940  | -2.51875630 | -0.41526680 |
| H | 2.94889030  | -2.40253450 | 0.43536840  |
| H | 1.39707850  | -3.11094160 | -0.07925950 |
| C | 0.24627120  | 3.43542050  | -2.24339860 |
| N | -0.50730960 | 3.81480600  | -1.03701240 |
| C | -1.77535100 | 4.42752310  | -1.43034840 |
| C | -2.78958230 | 3.36857340  | -1.85827710 |
| N | -3.96564110 | 3.79482900  | -2.36391670 |
| C | 0.28704940  | 4.68370130  | -0.12998250 |

|   |             |             |             |
|---|-------------|-------------|-------------|
| C | 0.31110620  | 4.21448770  | 1.32998650  |
| N | 0.73749660  | 2.80985420  | 1.46725750  |
| C | 0.82945690  | 2.37943090  | 2.87342820  |
| C | 0.59068050  | 0.86435920  | 2.96653290  |
| N | 0.98965170  | 0.19598430  | 4.05166570  |
| C | 1.64828110  | 0.80979980  | 5.20651430  |
| O | -2.52659590 | 2.15845090  | -1.72014340 |
| C | -5.02726580 | 2.83208300  | -2.63378320 |
| C | 2.04984830  | 2.55980510  | 0.83428540  |
| O | -0.01303100 | 0.29698850  | 2.02294960  |
| C | 0.92392510  | -1.27001990 | 4.09531770  |
| H | -0.09667080 | 5.71848740  | -0.14388550 |
| H | 1.31590040  | 4.74015190  | -0.51289440 |
| H | 0.98772370  | 4.89697600  | 1.88713630  |
| H | -0.69359440 | 4.32605290  | 1.77170670  |
| H | 1.98174610  | 2.62486050  | -0.25416890 |
| H | -0.36893850 | 2.77528630  | -2.86767560 |
| H | 1.81670900  | 2.63408090  | 3.29197920  |
| H | 0.04605350  | 2.87891120  | 3.46145260  |
| H | -2.21489620 | 4.95779260  | -0.57124140 |
| H | -1.62335640 | 5.16712360  | -2.24378310 |
| H | 1.95301590  | -1.65799460 | 4.15407090  |
| H | 0.44191000  | -1.66740910 | 3.19738070  |
| H | 2.72554110  | 0.58123850  | 5.19422700  |
| H | 1.19957290  | 0.39166830  | 6.12219300  |
| H | -4.60029640 | 1.82471660  | -2.67101220 |
| H | -5.50559000 | 3.06275820  | -3.59875360 |
| C | -4.35143840 | 5.20360380  | -2.36855680 |
| H | -5.18947860 | 5.33832590  | -3.06618240 |
| H | -4.66804040 | 5.54331990  | -1.36697940 |
| N | -3.68162720 | 3.96503270  | 1.51450670  |
| O | -3.25715710 | 5.12583210  | 1.44450220  |
| O | -3.21406410 | 3.09585030  | 0.68846910  |
| O | -4.54162500 | 3.62021660  | 2.32283200  |
| N | 3.88381140  | 0.10606530  | 2.94355710  |
| O | 4.14960190  | -0.67144370 | 3.87731900  |
| O | 3.47759880  | -0.35000000 | 1.84230330  |
| O | 3.98789380  | 1.34221540  | 3.10043090  |
| N | -1.01662720 | -4.25386970 | 1.19248400  |
| O | -0.22506830 | -4.68461410 | 0.33263000  |
| O | -0.60590390 | -3.44537620 | 2.07116870  |
| O | -2.21593110 | -4.58189720 | 1.17242610  |
| C | -3.23479398 | -0.05967648 | -2.62262296 |
| H | -3.71841500 | 0.24138755  | -1.71687953 |
| H | -2.99243264 | 0.80634442  | -3.20242359 |
| H | -3.89030891 | -0.69249907 | -3.18363610 |
| C | -2.00352508 | -2.22418505 | -2.93272189 |
| H | -3.02516557 | -2.52003300 | -3.04944681 |

|   |             |             |             |
|---|-------------|-------------|-------------|
| H | -1.49707351 | -2.92972085 | -2.30772106 |
| C | -1.32145477 | -2.17851045 | -4.31268346 |
| H | -1.57489190 | -3.05912198 | -4.86512616 |
| H | -1.65535132 | -1.31376526 | -4.84712603 |
| H | -0.26021525 | -2.13090916 | -4.18460222 |
| C | -4.80639788 | 1.78237055  | 1.84983632  |
| H | -3.89398094 | 2.12157837  | 2.29405854  |
| H | -5.07932390 | 2.43874974  | 1.05010027  |
| H | -5.58170121 | 1.77704001  | 2.58724823  |
| C | -5.72756136 | -0.56113210 | 1.83076150  |
| H | -6.14367113 | -1.12177636 | 1.01994052  |
| H | -5.32144431 | -1.23312413 | 2.55766979  |
| C | -6.82981063 | 0.29466982  | 2.48210596  |
| H | -7.09296550 | 1.09738375  | 1.82537172  |
| H | -7.69124251 | -0.31284933 | 2.66583296  |
| H | -6.47107207 | 0.69409041  | 3.40767056  |
| C | 0.64630500  | 4.67109699  | -3.07085045 |
| H | 1.70064025  | 4.65274142  | -3.25234499 |
| H | 0.39276992  | 5.55932710  | -2.53078820 |
| C | -0.10621489 | 4.65480404  | -4.41437133 |
| H | -1.00756997 | 5.22446705  | -4.32524733 |
| H | 0.51261911  | 5.08303273  | -5.17500572 |
| H | -0.34654833 | 3.64559187  | -4.67634584 |
| C | 1.51419016  | 2.64594244  | -1.86829072 |
| H | 1.70525848  | 1.90276016  | -2.61399374 |
| H | 2.34697033  | 3.31527255  | -1.81020119 |
| H | 1.37129795  | 2.17126138  | -0.92005041 |
| C | 3.10000240  | 3.56179148  | 1.34887230  |
| H | 3.93816970  | 3.02784081  | 1.74544795  |
| H | 2.66777153  | 4.16851155  | 2.11696554  |
| C | 3.56591103  | 4.45904391  | 0.18720660  |
| H | 3.62644420  | 3.87862462  | -0.70964856 |
| H | 2.86580375  | 5.25639803  | 0.04945244  |
| H | 4.52920079  | 4.86552449  | 0.41468491  |
| C | 2.55761362  | 1.15329289  | 1.20238565  |
| H | 3.44314655  | 0.93593130  | 0.64248801  |
| H | 2.77909570  | 1.11653115  | 2.24856645  |
| H | 1.80339641  | 0.43016463  | 0.97186035  |
| C | -6.09899694 | 2.87787887  | -1.52884198 |
| H | -5.82286561 | 3.60501599  | -0.79404738 |
| C | -6.21052643 | 1.49318362  | -0.86417647 |
| H | -5.29812264 | 0.95339200  | -1.00924309 |
| H | -6.39075047 | 1.61397062  | 0.18359727  |
| C | -7.37584735 | 0.71154232  | -1.49873460 |
| H | -7.32002473 | 0.79069893  | -2.56434150 |
| H | -7.31195008 | -0.31781698 | -1.21371429 |
| C | -7.45662083 | 3.26183619  | -2.14612161 |
| H | -7.62981336 | 2.67200519  | -3.02190910 |



|   |              |             |             |
|---|--------------|-------------|-------------|
| H | -8.23551411  | 3.08162637  | -1.43496081 |
| C | -8.71347491  | 1.29748272  | -1.00983136 |
| H | -9.25454342  | 1.69490503  | -1.84301823 |
| H | -8.52382995  | 2.07782857  | -0.30272801 |
| C | -9.54531469  | 0.18831734  | -0.33946227 |
| H | -9.65607898  | 0.40582683  | 0.70232509  |
| H | -10.51072166 | 0.13981558  | -0.79830535 |
| H | -9.04710978  | -0.75134398 | -0.45663082 |
| C | -7.44395241  | 4.75407644  | -2.52646162 |
| H | -7.01815678  | 5.32252078  | -1.72616848 |
| H | -6.85928722  | 4.89148888  | -3.41200352 |
| H | -8.44561119  | 5.08503551  | -2.70547499 |
| C | -3.19770325  | 6.10454609  | -2.84688534 |
| H | -2.62989608  | 6.43539348  | -2.00247133 |
| C | -3.77327283  | 7.32526639  | -3.58861414 |
| H | -4.21703157  | 7.00690600  | -4.50873633 |
| H | -4.51578332  | 7.79580643  | -2.97855658 |
| C | -2.64150143  | 8.32696127  | -3.88408136 |
| H | -1.95155077  | 7.89154646  | -4.57638334 |
| H | -2.13097032  | 8.56668028  | -2.97479989 |
| C | -3.23752668  | 9.61031136  | -4.49183661 |
| H | -3.78267844  | 9.36487743  | -5.37923266 |
| H | -3.89632569  | 10.06775094 | -3.78357614 |
| C | -2.10076275  | 10.58853128 | -4.84177025 |
| H | -1.43753060  | 10.12811827 | -5.54394044 |
| H | -2.51433565  | 11.47693057 | -5.27142611 |
| H | -1.56059284  | 10.84021700 | -3.95307977 |
| C | -2.28561685  | 5.30859488  | -3.79880974 |
| H | -1.26657682  | 5.41908563  | -3.49180939 |
| H | -2.55654372  | 4.27385788  | -3.77020947 |
| C | -2.45025448  | 5.84286759  | -5.23374775 |
| H | -3.45362597  | 6.18742862  | -5.37311539 |
| H | -1.76959587  | 6.65295514  | -5.39300238 |
| H | -2.24193260  | 5.05943428  | -5.93212748 |
| C | -3.98683749  | 3.59270540  | 6.20194552  |
| H | -4.95706711  | 3.29420056  | 5.86364191  |
| C | -3.87294562  | -0.55333320 | 5.45956716  |
| H | -2.90088999  | -0.81626509 | 5.09780110  |
| C | -3.93928291  | 5.12611011  | 6.33614156  |
| H | -4.60177001  | 5.56743047  | 5.62112605  |
| H | -2.94164475  | 5.46903249  | 6.15719371  |
| C | -4.37409524  | 5.53079097  | 7.75697640  |
| H | -5.34554948  | 5.13092269  | 7.96015619  |
| H | -3.67368515  | 5.14478954  | 8.46784107  |
| C | -4.41880644  | 7.06653644  | 7.86227002  |
| H | -5.13672168  | 7.45087873  | 7.16816721  |
| H | -3.45317402  | 7.46784890  | 7.63554916  |
| C | -4.82004508  | 7.47152584  | 9.29286121  |

|   |             |             |            |
|---|-------------|-------------|------------|
| H | -4.86073301 | 8.53842515  | 9.36336192 |
| H | -5.78135518 | 7.06194447  | 9.52313492 |
| H | -4.09682957 | 7.09559650  | 9.98606858 |
| C | -3.69985561 | 2.94845458  | 7.57095329 |
| H | -3.44345385 | 3.71045110  | 8.27701239 |
| H | -2.88591896 | 2.26019446  | 7.47765195 |
| C | -4.95336085 | 2.19807873  | 8.05804743 |
| H | -4.72719633 | 1.15774243  | 8.16505210 |
| H | -5.26209904 | 2.59494469  | 9.00254631 |
| H | -5.74172878 | 2.32018426  | 7.34497923 |
| C | -4.19146838 | -1.37740614 | 6.72093429 |
| H | -3.48433340 | -1.14206498 | 7.48870683 |
| H | -5.17842903 | -1.14224069 | 7.06079587 |
| C | -4.10725125 | -2.87865651 | 6.38813587 |
| H | -4.79579775 | -3.10891555 | 5.60214320 |
| H | -3.11325177 | -3.11897849 | 6.07331786 |
| C | -4.46265808 | -3.70262145 | 7.63968202 |
| H | -5.45965638 | -3.46843896 | 7.94960613 |
| H | -3.77920145 | -3.46620354 | 8.42828433 |
| C | -4.36679914 | -5.20389875 | 7.31017096 |
| H | -3.36372941 | -5.44303186 | 7.02457249 |
| H | -4.63822809 | -5.77635444 | 8.17244748 |
| H | -5.03183667 | -5.43540477 | 6.50454695 |
| C | -4.92292233 | -0.85120259 | 4.37309456 |
| H | -5.13490648 | 0.04415847  | 3.82693406 |
| H | -4.54315852 | -1.59533049 | 3.70454903 |
| C | -6.21437591 | -1.36673457 | 5.03489093 |
| H | -6.36543877 | -2.39260111 | 4.77092529 |
| H | -6.12918128 | -1.28082438 | 6.09802841 |
| H | -7.04581597 | -0.78497234 | 4.69553843 |
| C | 1.44717313  | 2.33643424  | 5.22981385 |
| H | 2.13524811  | 2.79720683  | 4.55221408 |
| C | 0.00552314  | 2.67084906  | 4.80388894 |
| H | 0.01333024  | 3.52320597  | 4.15710711 |
| H | -0.41668944 | 1.83461943  | 4.28682363 |
| C | -0.83969220 | 2.98205253  | 6.05303402 |
| H | -1.37393150 | 3.89697106  | 5.90332612 |
| H | -1.53509743 | 2.18626546  | 6.22046910 |
| H | -0.19730741 | 3.07914677  | 6.90321900 |
| C | 1.69740174  | 2.86548520  | 6.65427541 |
| H | 1.37484591  | 3.88369449  | 6.71836578 |
| H | 1.14903905  | 2.27277188  | 7.35633615 |
| C | 3.20110172  | 2.78213981  | 6.97605161 |
| H | 3.49606240  | 1.75550968  | 7.03873157 |
| H | 3.75884384  | 3.26687112  | 6.20219162 |
| C | 3.47754659  | 3.47872362  | 8.32139514 |
| H | 2.91460316  | 2.99822870  | 9.09413011 |
| H | 3.18883190  | 4.50699547  | 8.25658130 |

|   |             |             |             |
|---|-------------|-------------|-------------|
| C | 4.97974225  | 3.38691799  | 8.64786095  |
| H | 5.53894367  | 3.91897094  | 7.90683907  |
| H | 5.16258537  | 3.81765131  | 9.61011726  |
| H | 5.28143062  | 2.36034465  | 8.65345657  |
| C | 0.13658099  | -1.71552042 | 5.34159958  |
| H | -0.39884506 | -0.88040087 | 5.74259121  |
| C | 1.11519055  | -2.25469158 | 6.40141927  |
| H | 0.95447051  | -1.74404907 | 7.32787127  |
| H | 2.12076685  | -2.09168422 | 6.07408929  |
| C | 0.87783843  | -3.76341465 | 6.59895072  |
| H | 0.17403299  | -3.91306721 | 7.39088633  |
| H | 0.49200091  | -4.18519887 | 5.69444673  |
| C | 2.20875756  | -4.44969536 | 6.95849633  |
| H | 2.68927157  | -3.90613606 | 7.74497557  |
| H | 2.84429681  | -4.46840797 | 6.09789207  |
| C | 1.93339391  | -5.89136260 | 7.42472637  |
| H | 2.86047918  | -6.37849710 | 7.64407284  |
| H | 1.32407890  | -5.87159848 | 8.30406964  |
| H | 1.42429961  | -6.42566968 | 6.64997548  |
| C | -0.85875920 | -2.82379729 | 4.95093312  |
| H | -0.36532686 | -3.54480856 | 4.33322180  |
| H | -1.67784286 | -2.39415266 | 4.41296710  |
| C | -1.38540459 | -3.51272354 | 6.22357811  |
| H | -1.40626093 | -2.80770058 | 7.02819457  |
| H | -2.37422793 | -3.88120001 | 6.04650894  |
| H | -0.74164066 | -4.32793939 | 6.48027079  |
| C | 3.88729070  | -1.07833181 | -2.25767563 |
| H | 3.25648106  | -1.58564330 | -2.95740004 |
| C | 4.76811724  | -2.10535338 | -1.52216811 |
| H | 4.32272495  | -3.07540395 | -1.59651586 |
| H | 4.85264706  | -1.82972413 | -0.49173945 |
| C | 6.16831557  | -2.13292696 | -2.16270254 |
| H | 6.73125199  | -2.94624238 | -1.75463317 |
| H | 6.07398981  | -2.25993869 | -3.22094196 |
| H | 6.67256957  | -1.21175802 | -1.95757893 |
| C | 4.78446400  | -0.07642172 | -3.00791309 |
| H | 5.41471972  | 0.43145311  | -2.30809820 |
| H | 4.17244915  | 0.63668840  | -3.51958856 |
| C | 5.65538363  | -0.83181746 | -4.02893036 |
| H | 6.66178835  | -0.88458415 | -3.66939561 |
| H | 5.27171366  | -1.82179882 | -4.16172436 |
| C | 5.63003044  | -0.08643536 | -5.37628434 |
| H | 4.67934710  | -0.23042758 | -5.84571743 |
| H | 5.79069146  | 0.95813860  | -5.20909199 |
| C | 6.74171879  | -0.63721798 | -6.28863708 |
| H | 6.71583649  | -0.12824150 | -7.22947344 |
| H | 7.69341105  | -0.48159463 | -5.82499583 |
| H | 6.58831532  | -1.68450434 | -6.44534915 |

|    |             |             |             |
|----|-------------|-------------|-------------|
| C  | 2.97051257  | -3.27369558 | -1.55274171 |
| H  | 3.15662213  | -2.60216565 | -2.36472126 |
| C  | 2.07851464  | -4.43139935 | -2.03819169 |
| H  | 1.43808838  | -4.74664515 | -1.24108800 |
| H  | 1.48383936  | -4.10129026 | -2.86419974 |
| C  | 2.96413993  | -5.61049469 | -2.48204081 |
| H  | 3.44043777  | -5.36950065 | -3.40938230 |
| H  | 3.70870329  | -5.79764799 | -1.73672272 |
| C  | 2.09263754  | -6.86707991 | -2.66391206 |
| H  | 1.33907703  | -6.67518008 | -3.39890936 |
| H  | 1.62764592  | -7.11642492 | -1.73304695 |
| C  | 2.97493948  | -8.04098649 | -3.12768639 |
| H  | 2.37932726  | -8.92666555 | -3.20330835 |
| H  | 3.39819154  | -7.81310472 | -4.08362969 |
| H  | 3.76032739  | -8.19882523 | -2.41835377 |
| C  | 4.30726469  | -3.83743182 | -1.03612269 |
| H  | 4.13179272  | -4.76318227 | -0.52907665 |
| H  | 4.75118356  | -3.13826086 | -0.35863024 |
| C  | 5.25765345  | -4.07506270 | -2.22435363 |
| H  | 4.92599310  | -3.50381582 | -3.06612463 |
| H  | 6.24784999  | -3.77173348 | -1.95527707 |
| H  | 5.25945201  | -5.11474596 | -2.47724787 |
| Am | -1.38817310 | 1.47719610  | 0.43350630  |
